# Supplementary material for: Detection of selection signatures in Piemontese and Marchigiana cattle, two breeds with similar production aptitudes but different selection histories
Source: PubMed Central journal article supplement (PMC4476081; doi:10.1186/s12711-015-0128-2), 2015-06-23

**FST BTA 1**

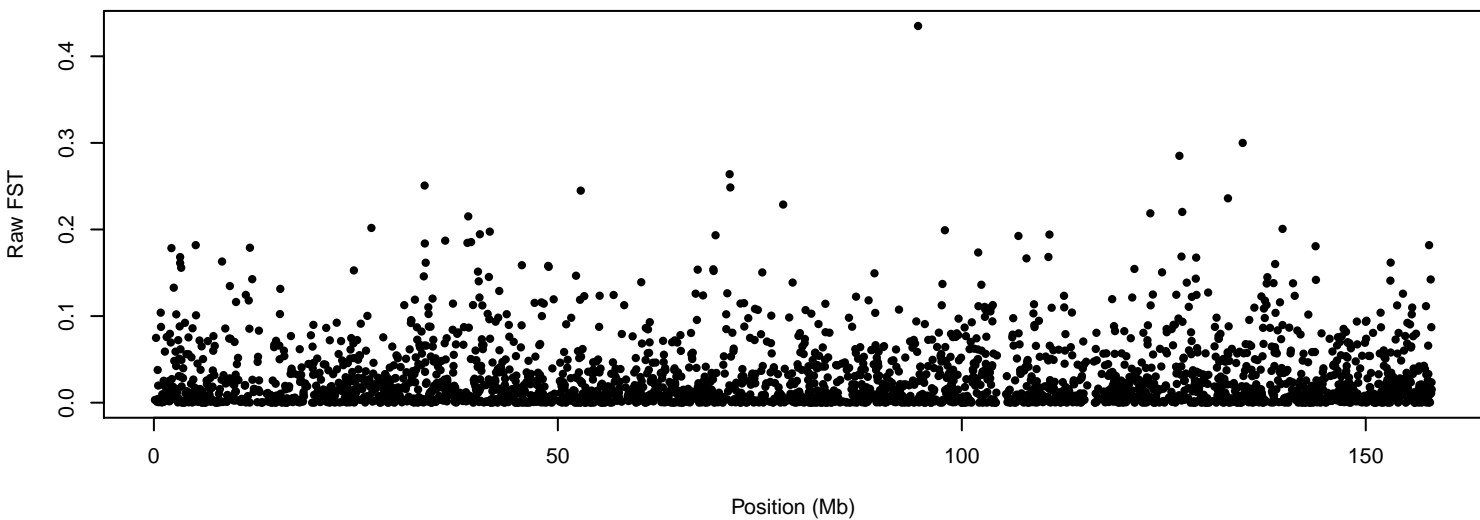

**LOWESS BTA 1**

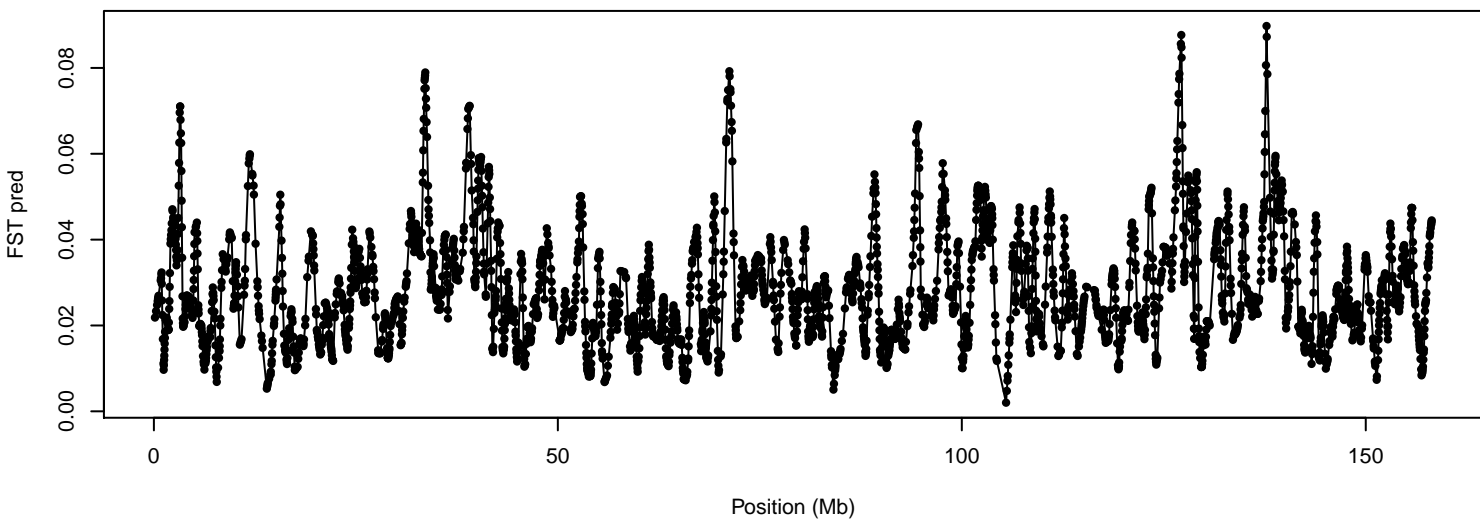

**Control Chart BTA 1**

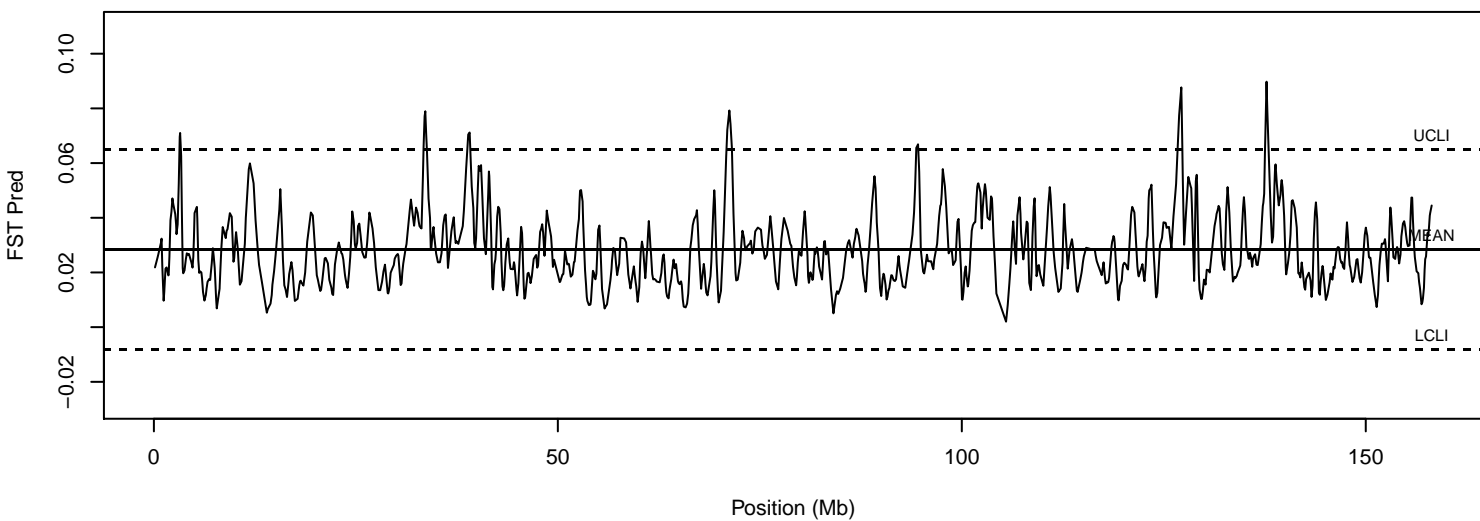

**FST BTA 2**

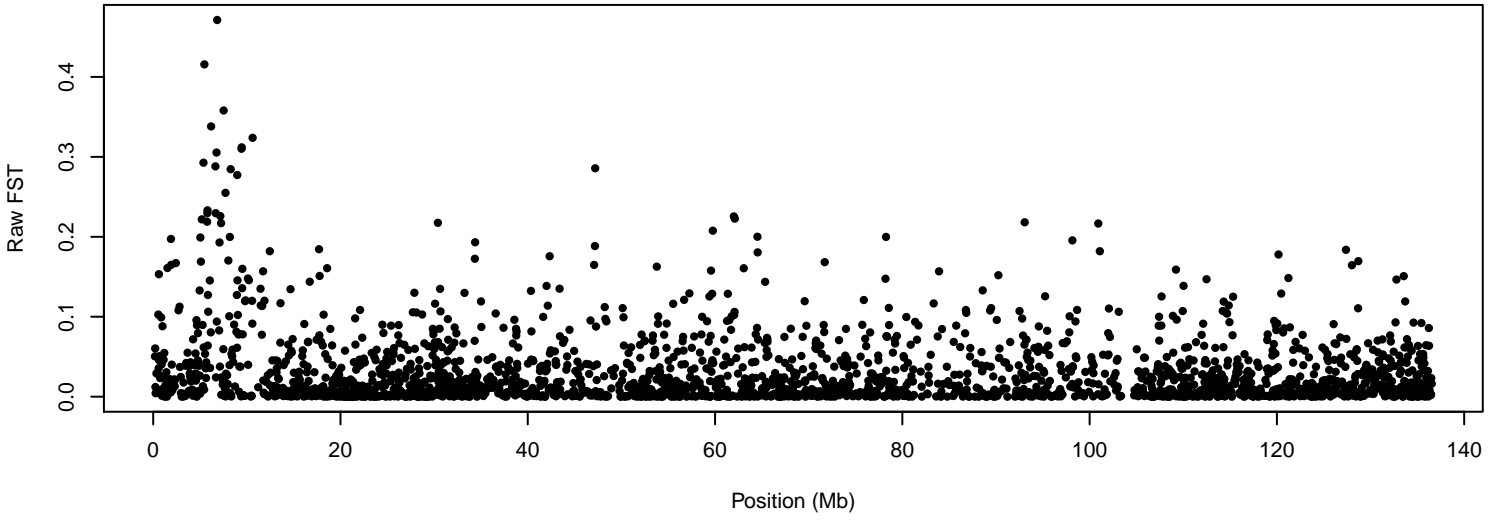

**LOWESS BTA 2**

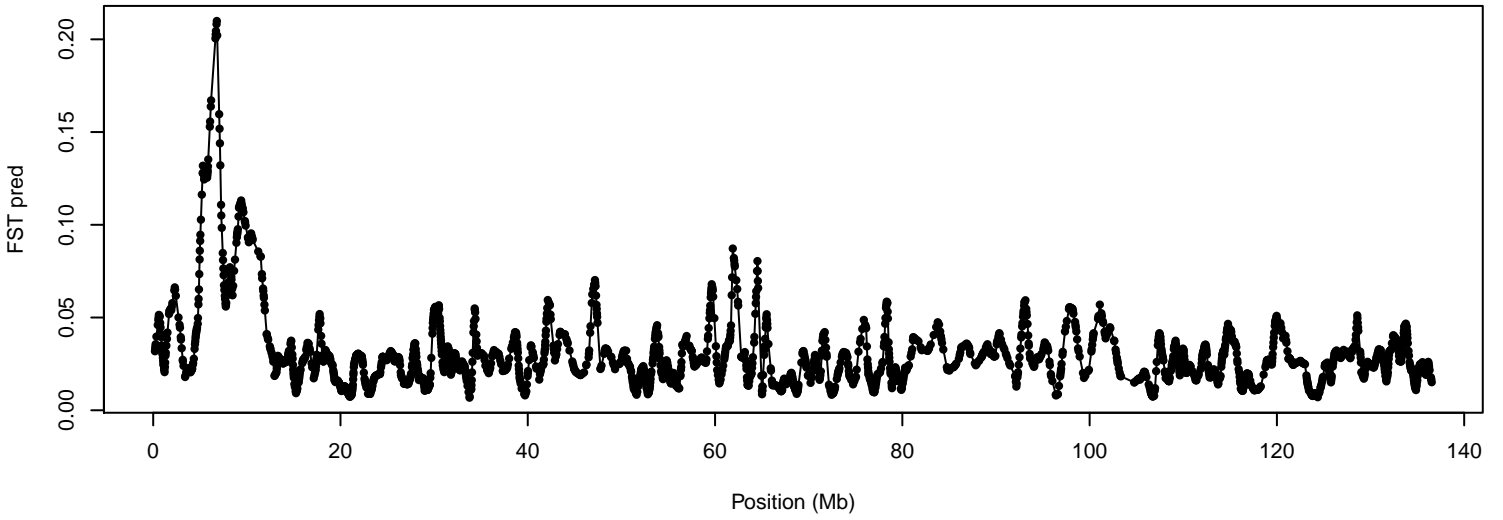

**Control Chart BTA 2**

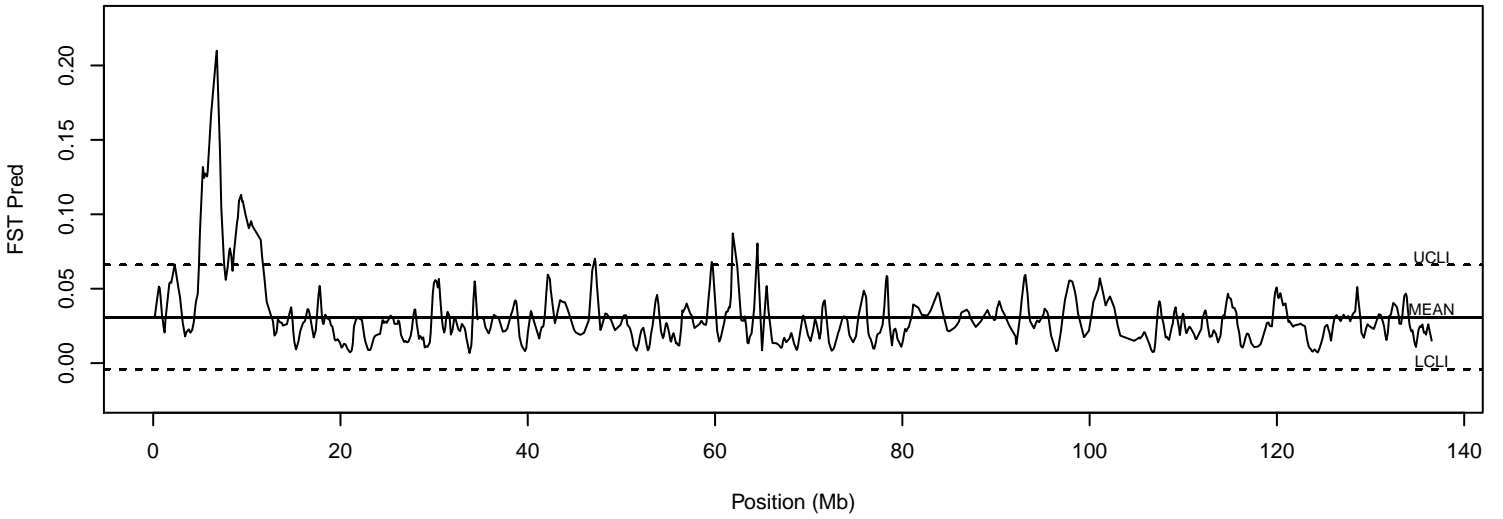

**FST BTA 3**

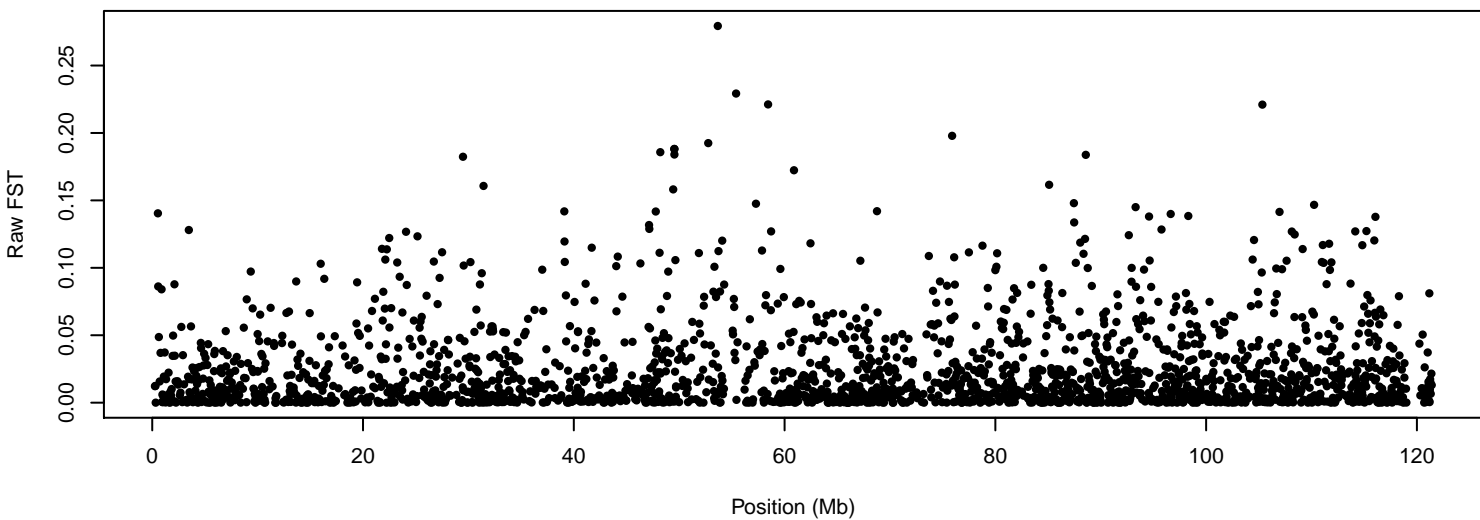

**LOWESS BTA 3**

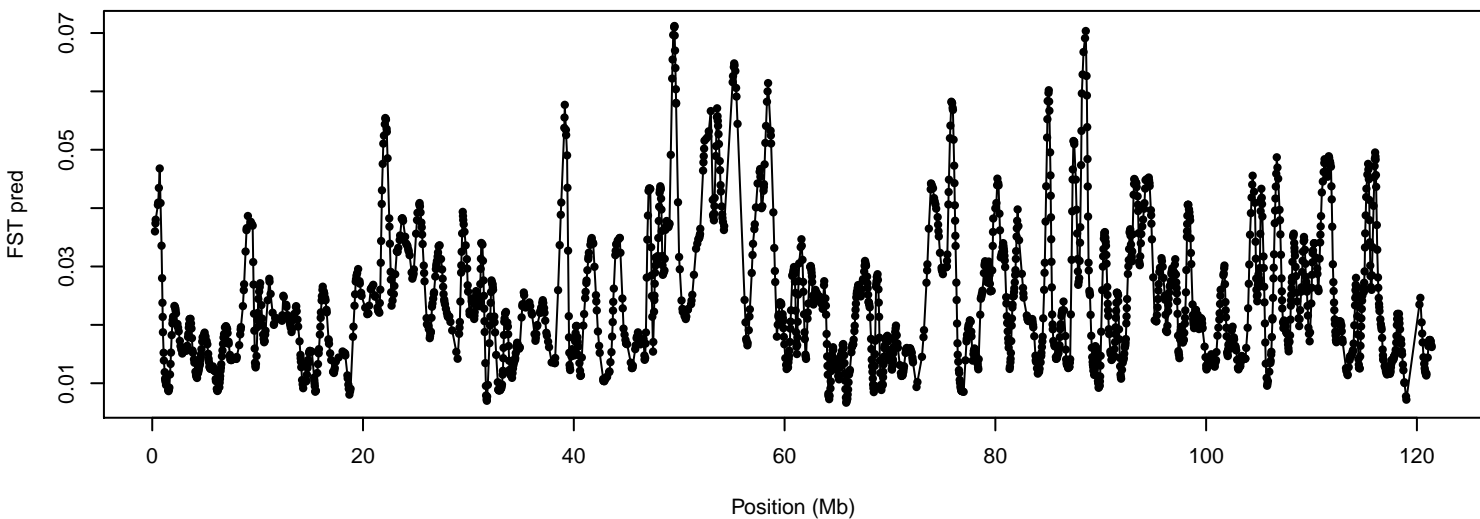

**Control Chart BTA 3**

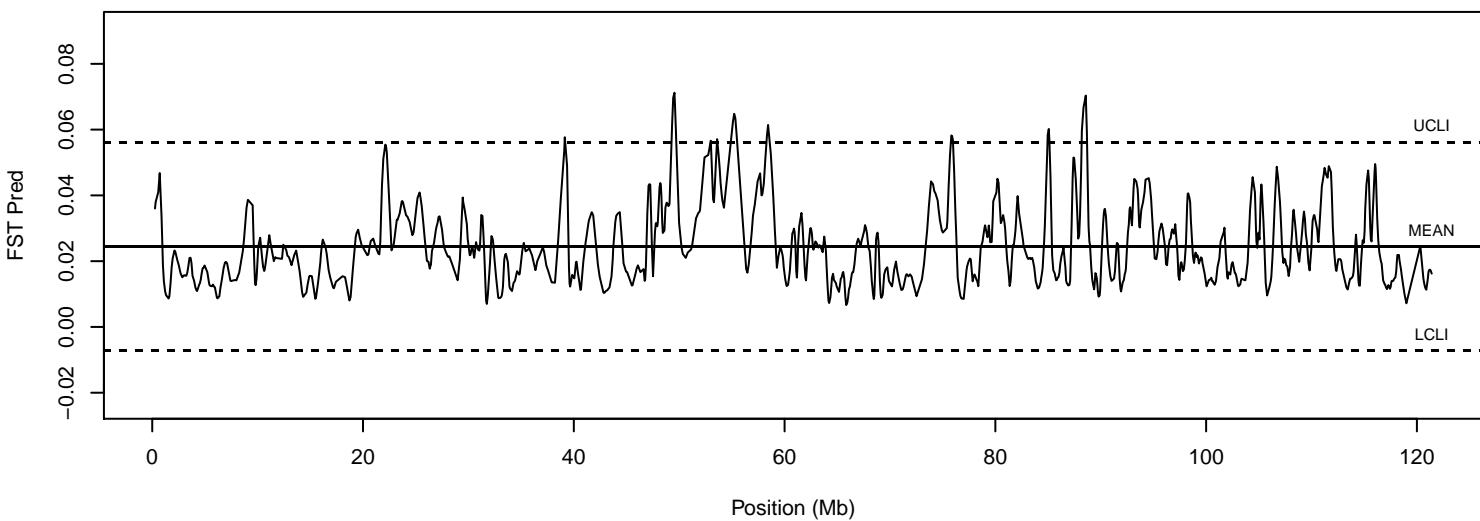

**FST BTA 4**

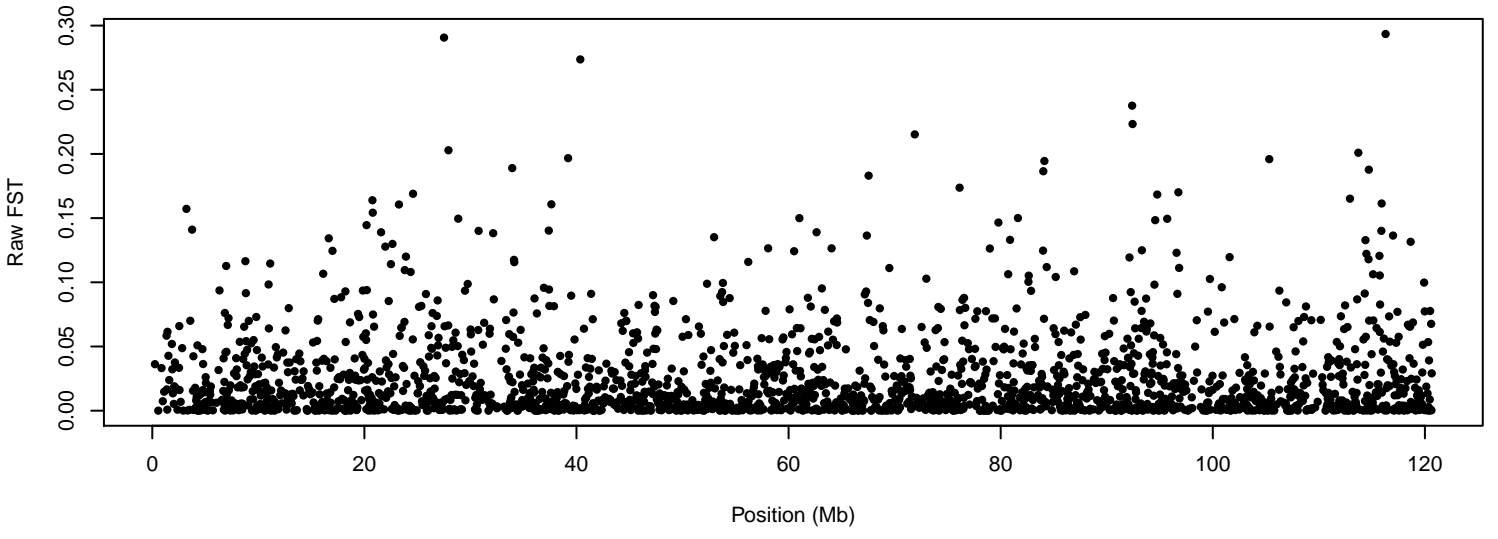

**LOWESS BTA 4**

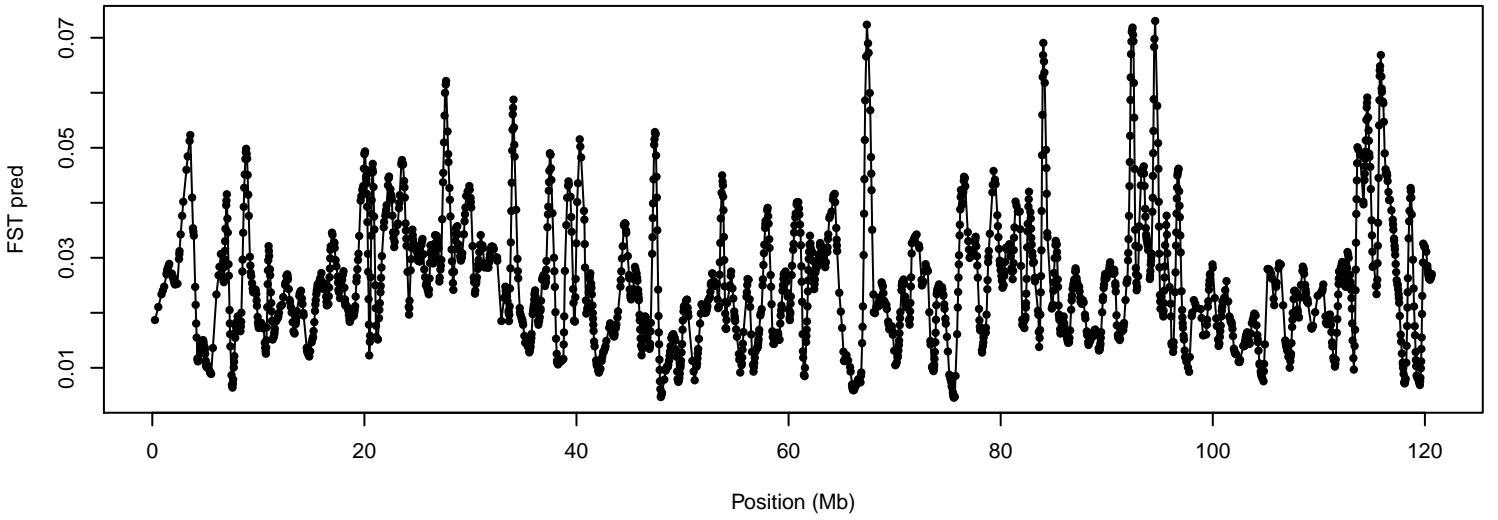

**Control Chart BTA 4**

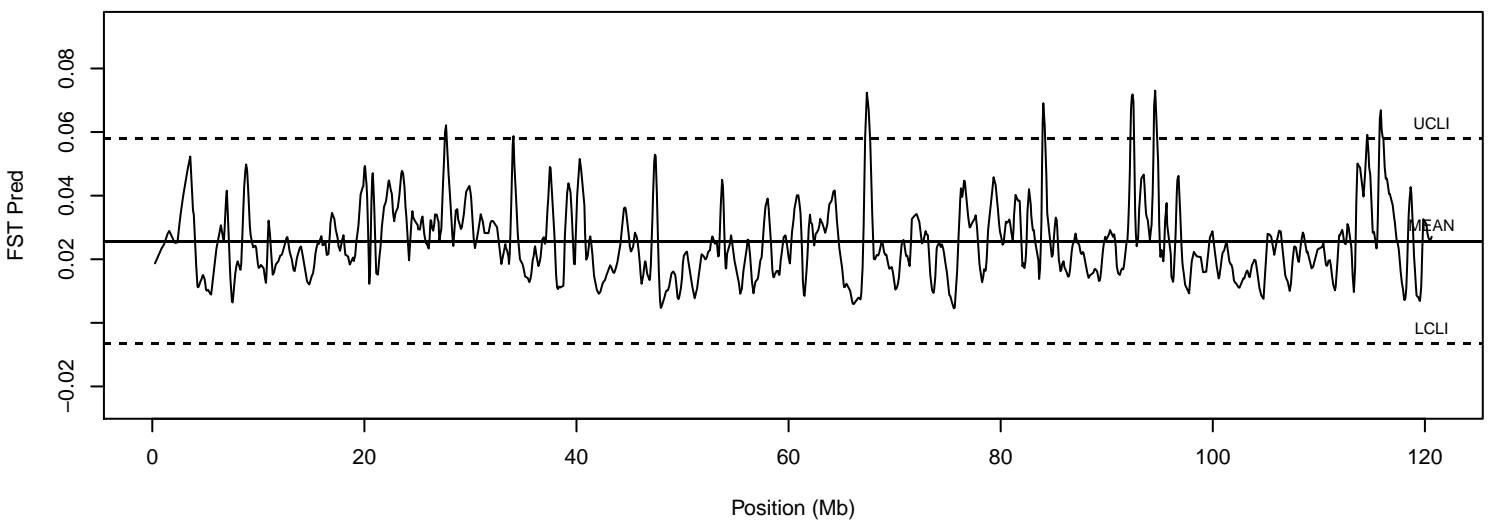

**FST BTA 5**

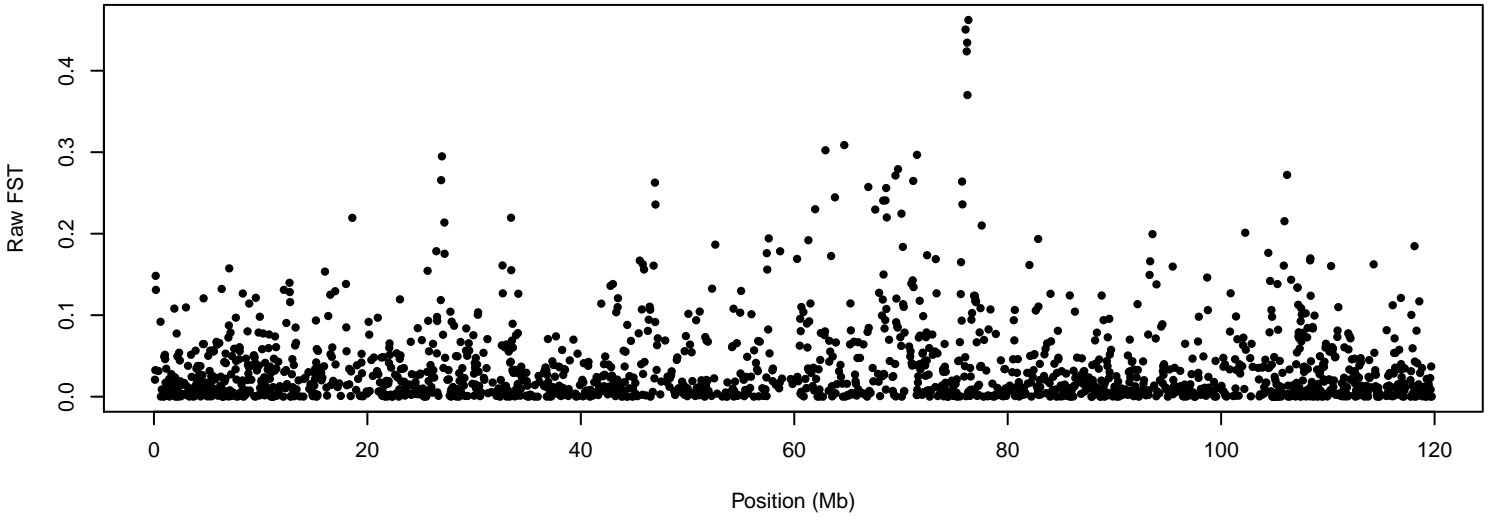

**LOWESS BTA 5**

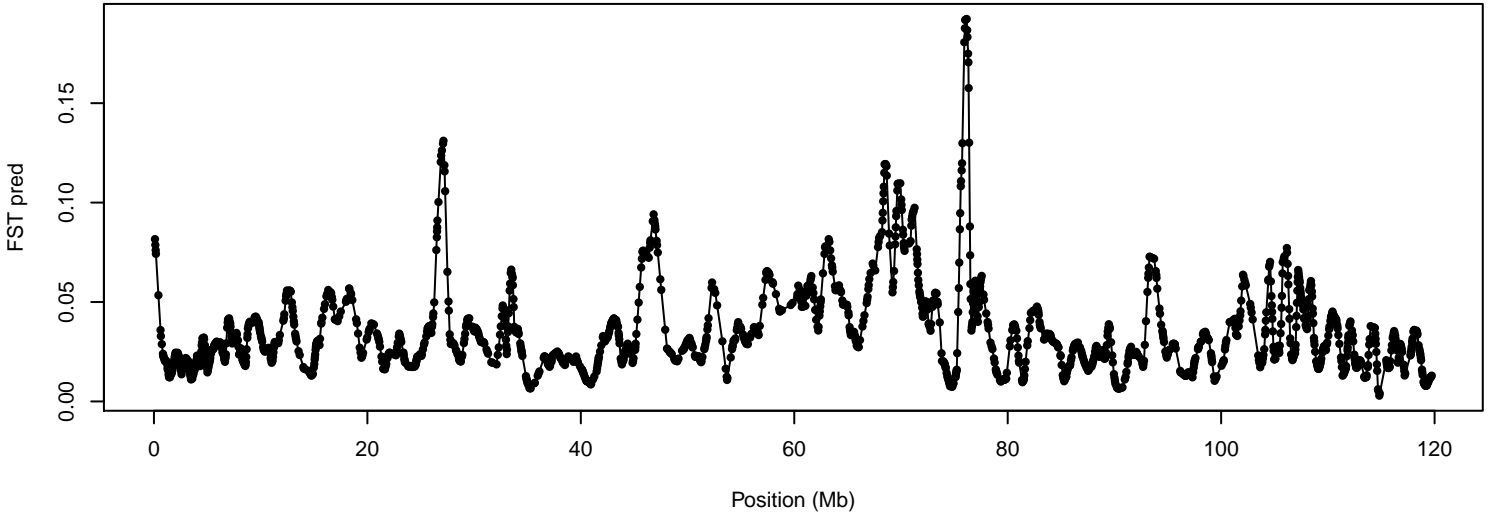

**Control Chart BTA 5**

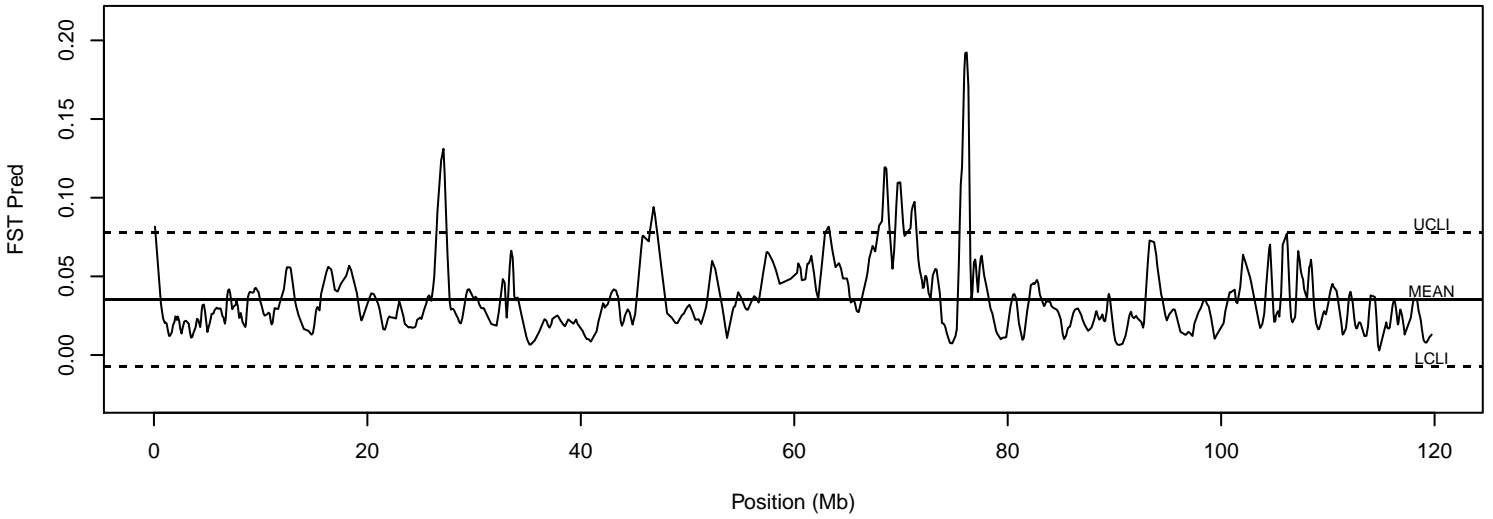

**FST BTA 6**

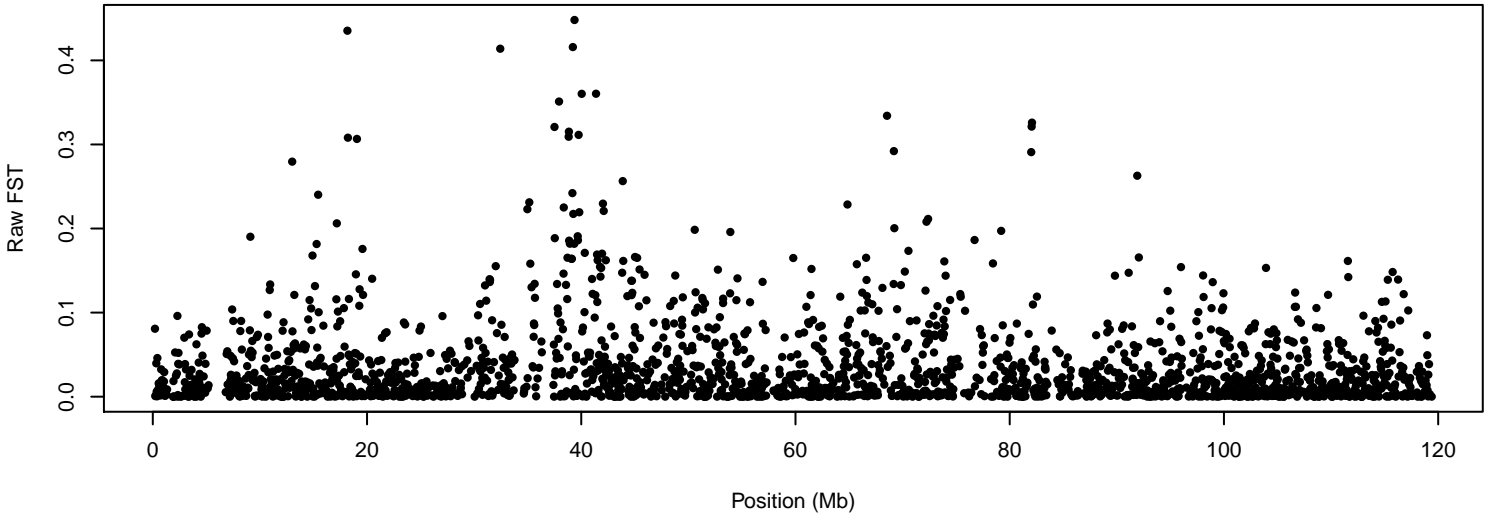

**LOWESS BTA 6**

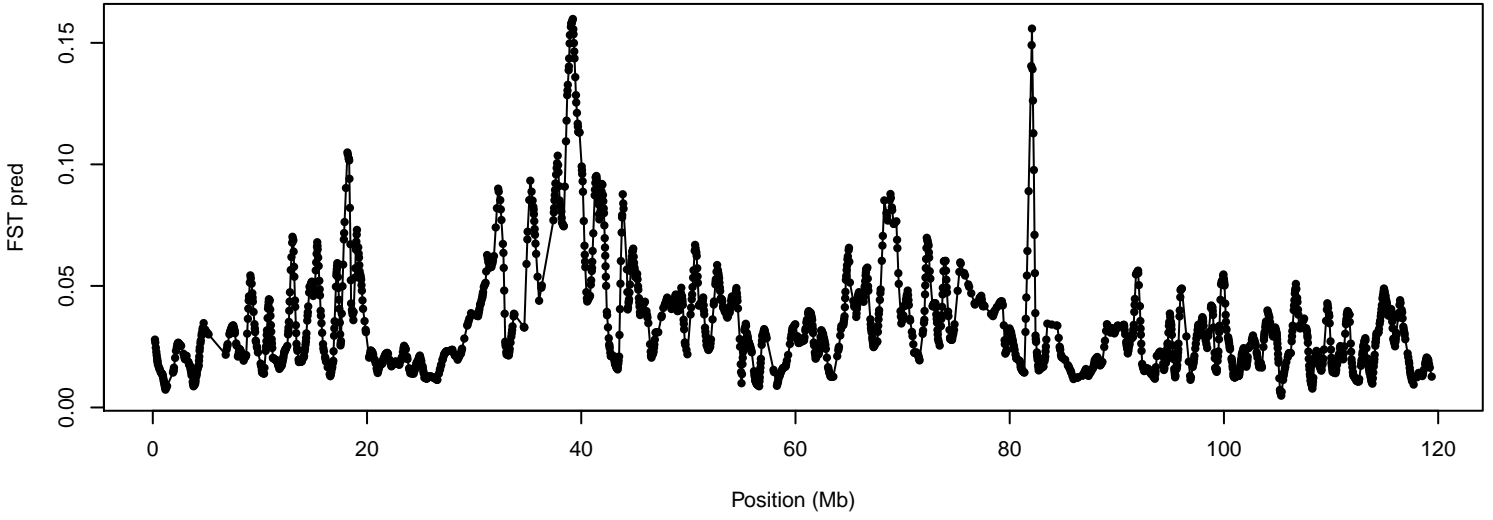

**Control Chart BTA 6**

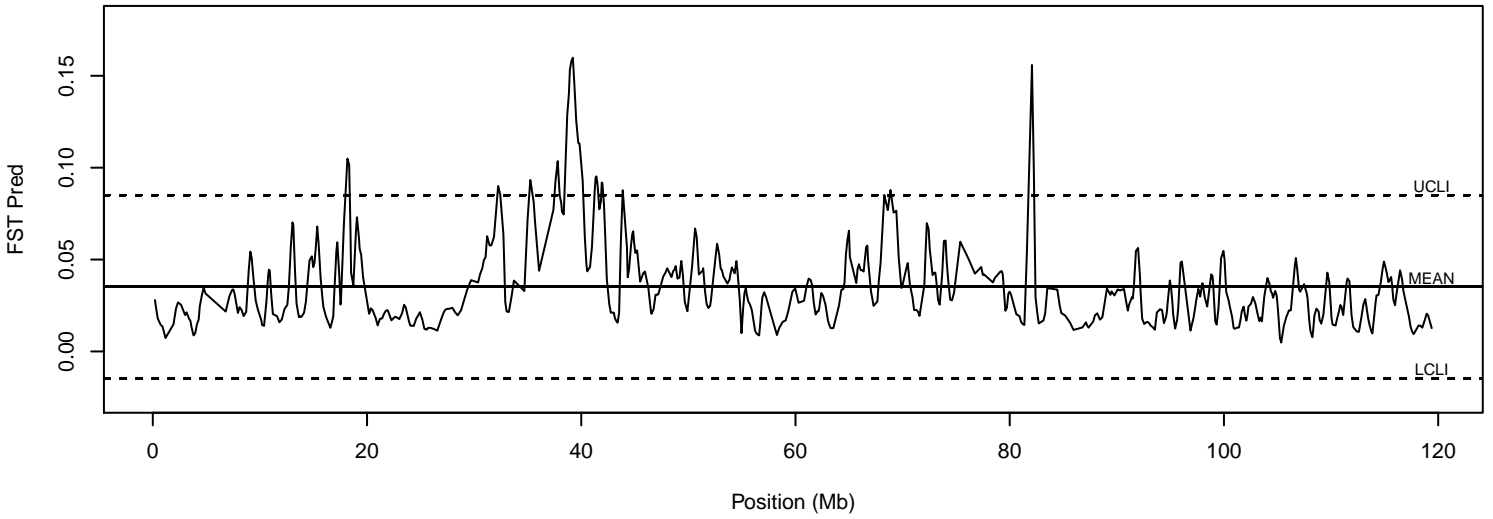

**FST BTA 7**

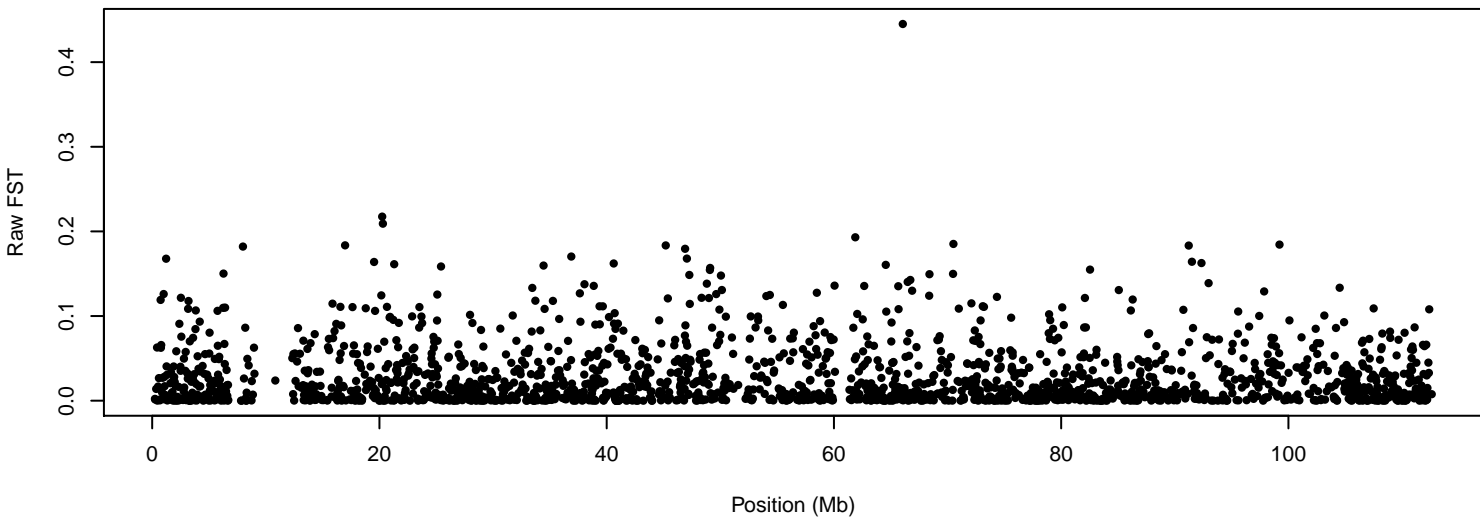

**LOWESS BTA 7**

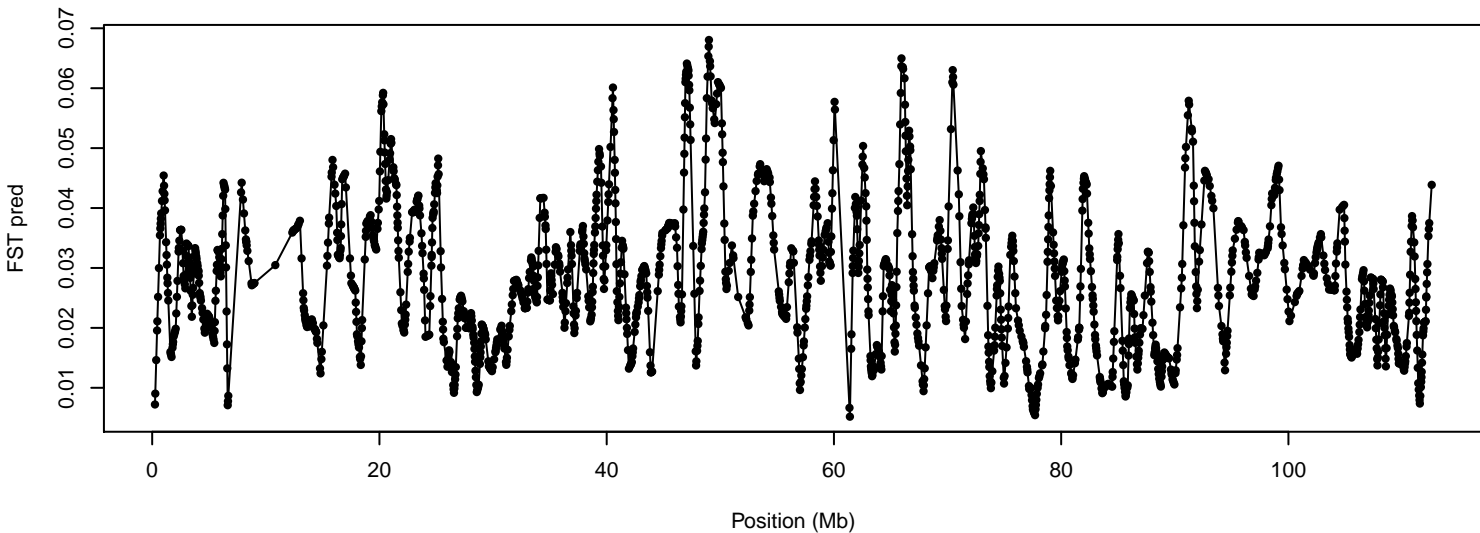

**Control Chart BTA 7**

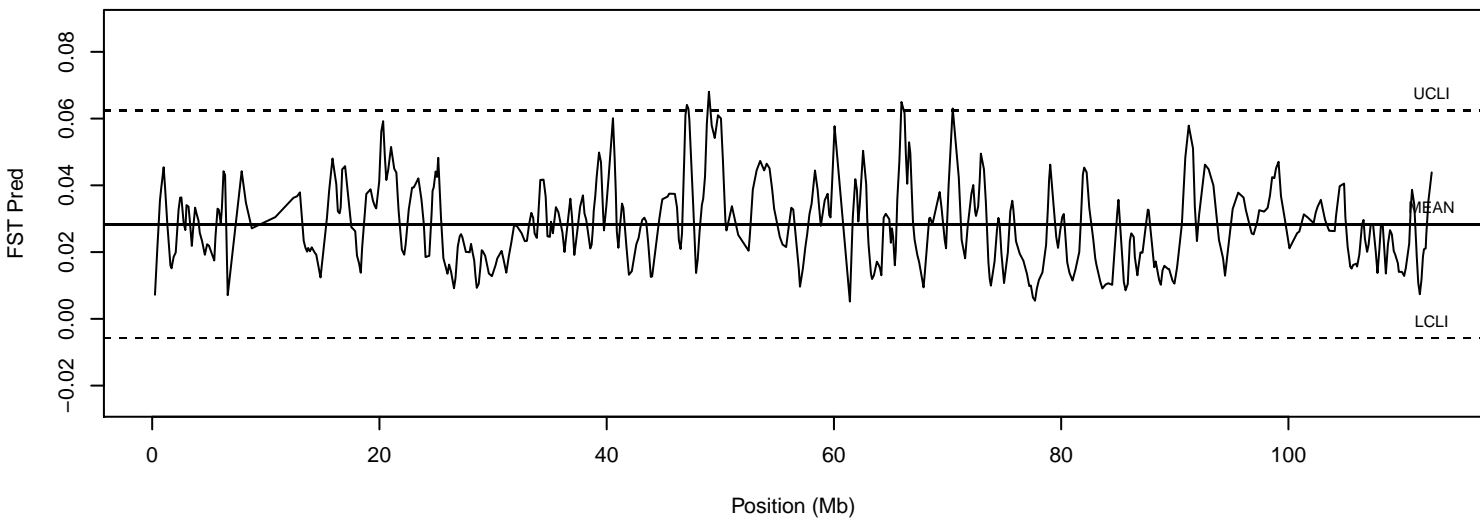

**FST BTA 8**

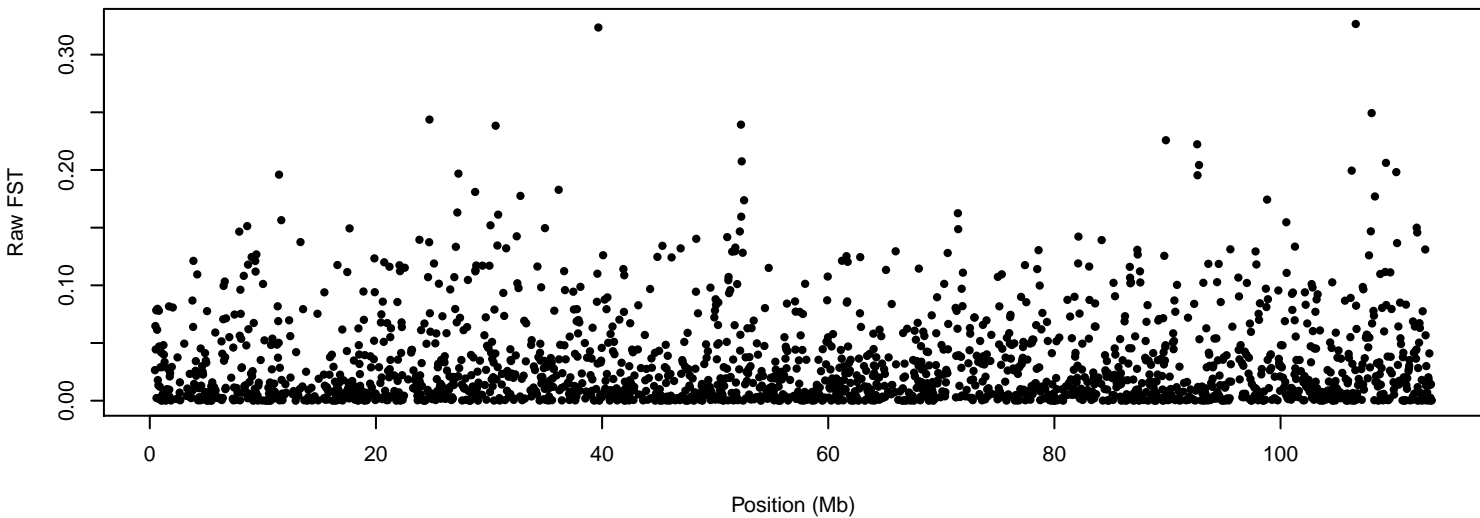

**LOWESS BTA 8**

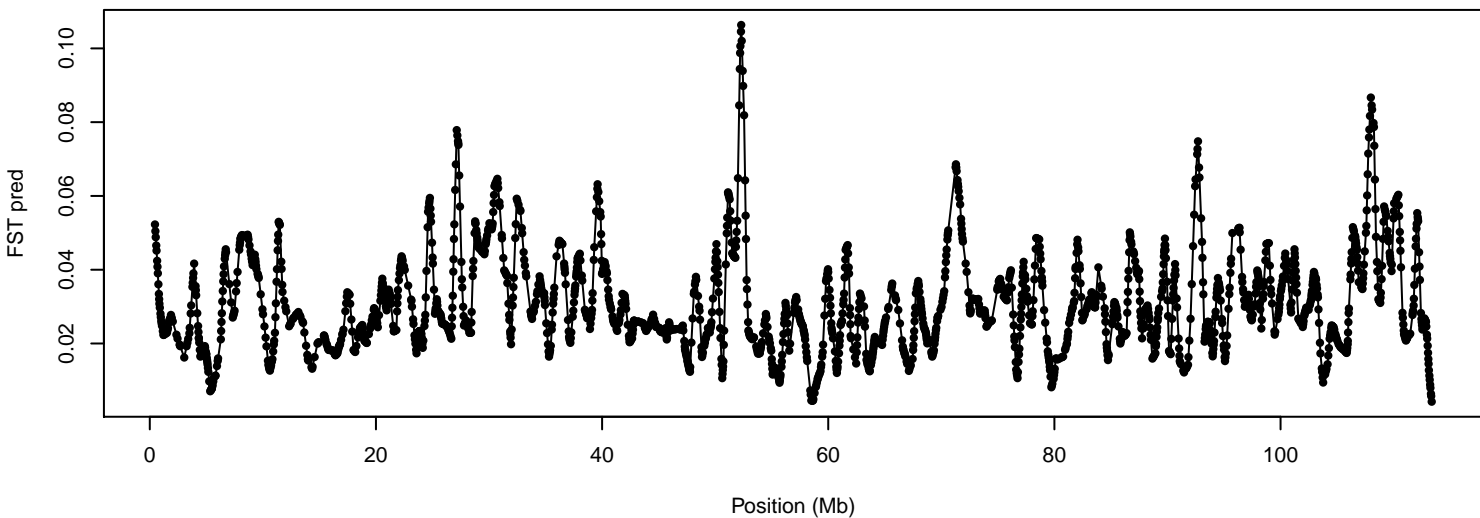

**Control Chart BTA 8**

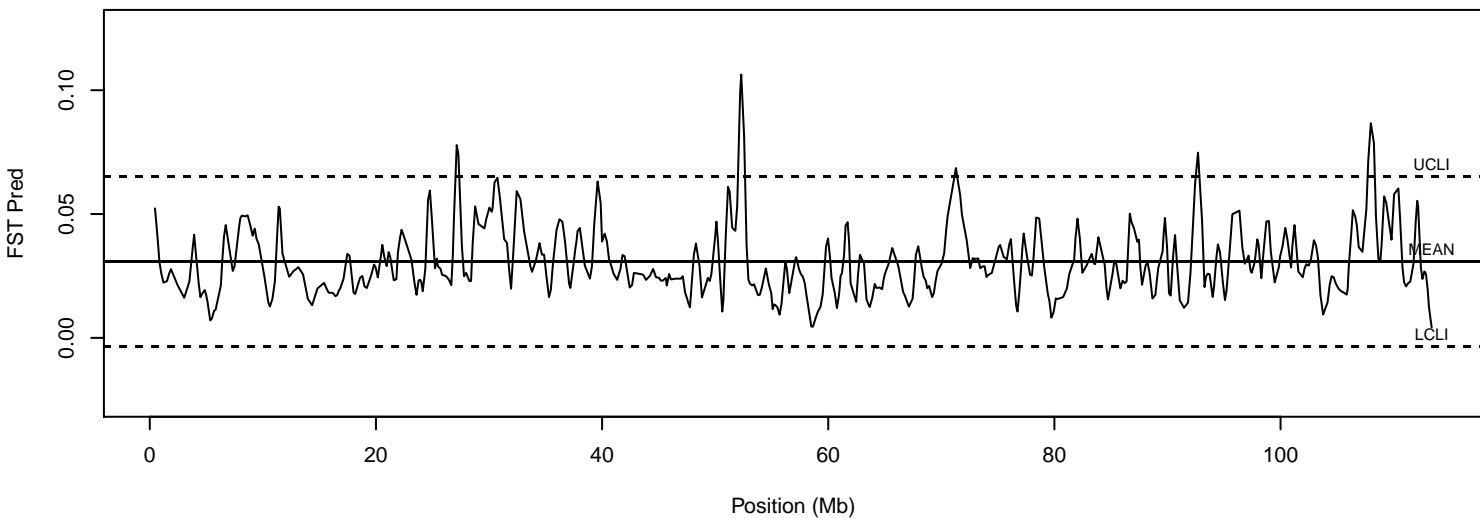



**FST BTA 9**

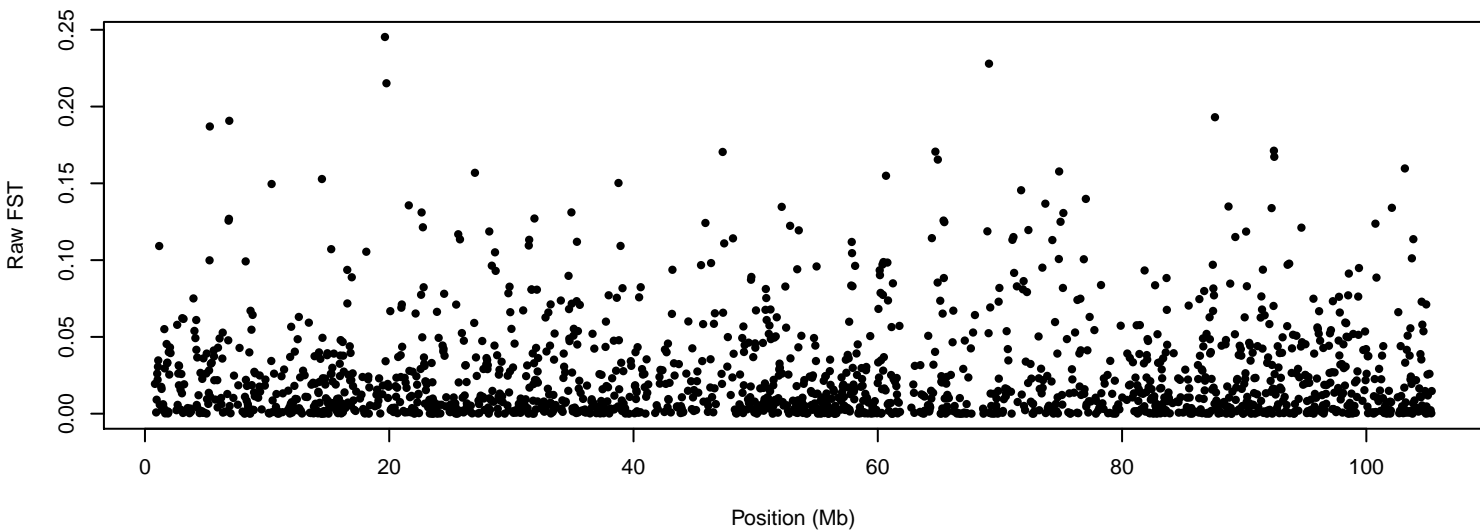

**LOWESS BTA 9**

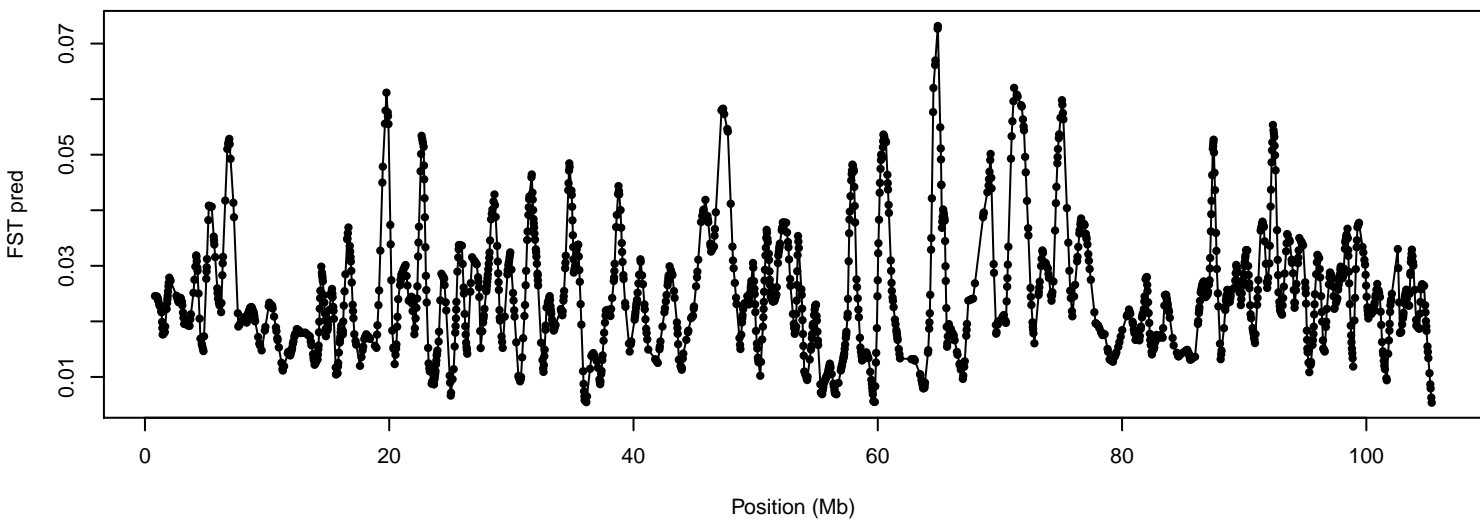

**Control Chart BTA 9**

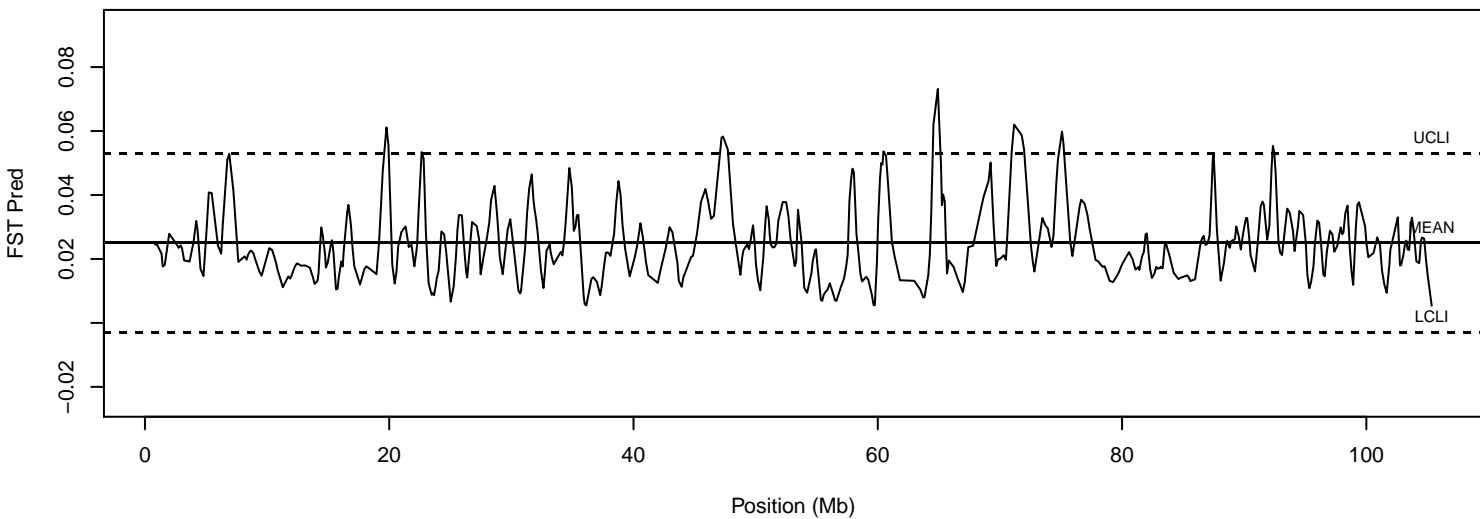

**FST BTA 10**

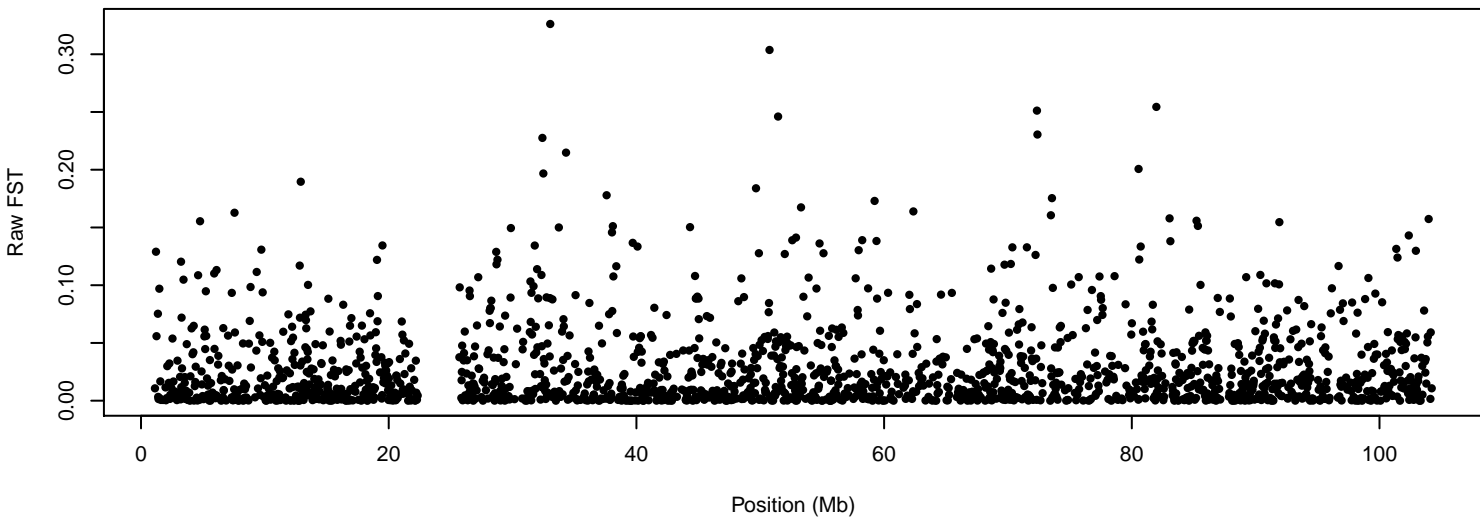

**LOWESS BTA 10**

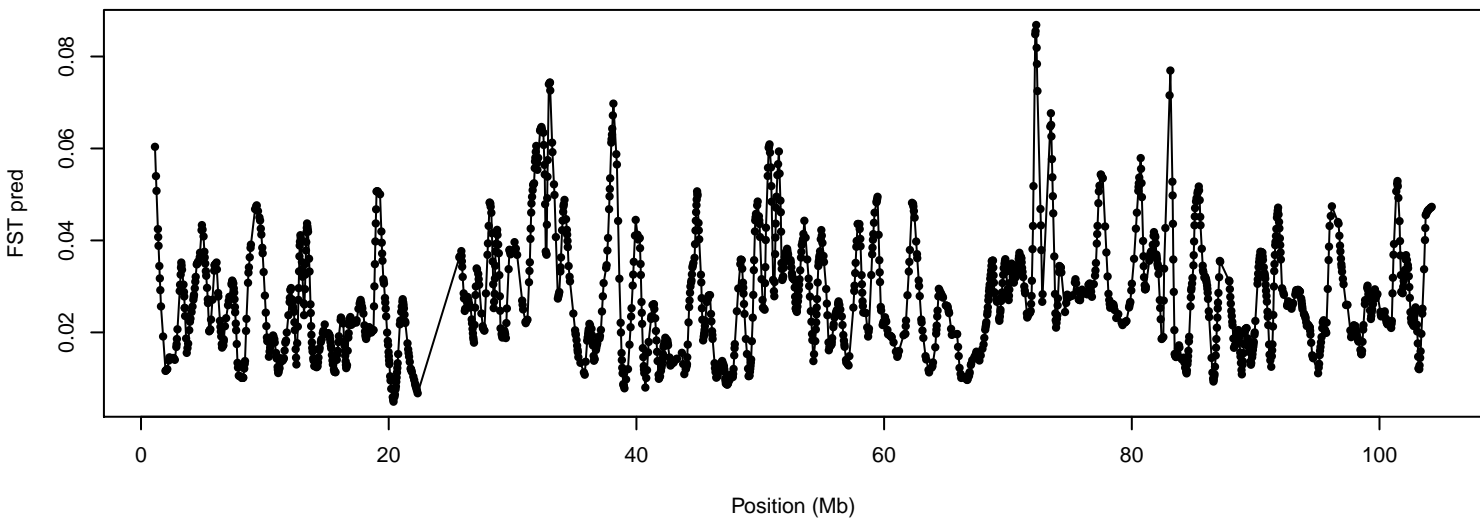

**Control Chart BTA 10**

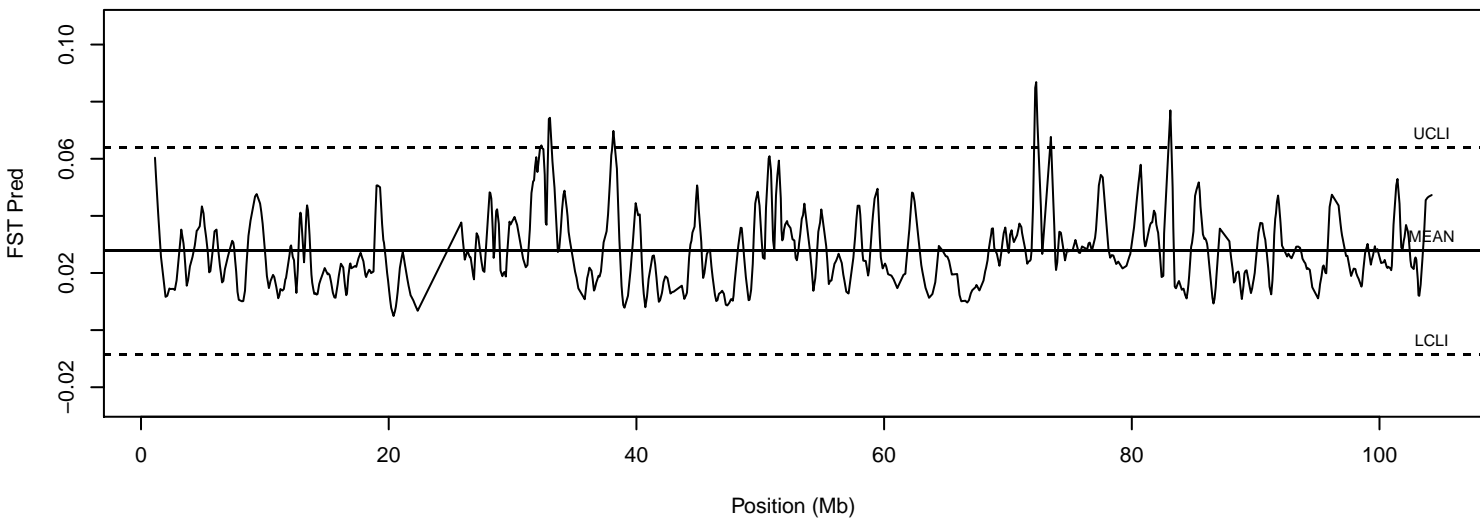

**FST BTA 11**

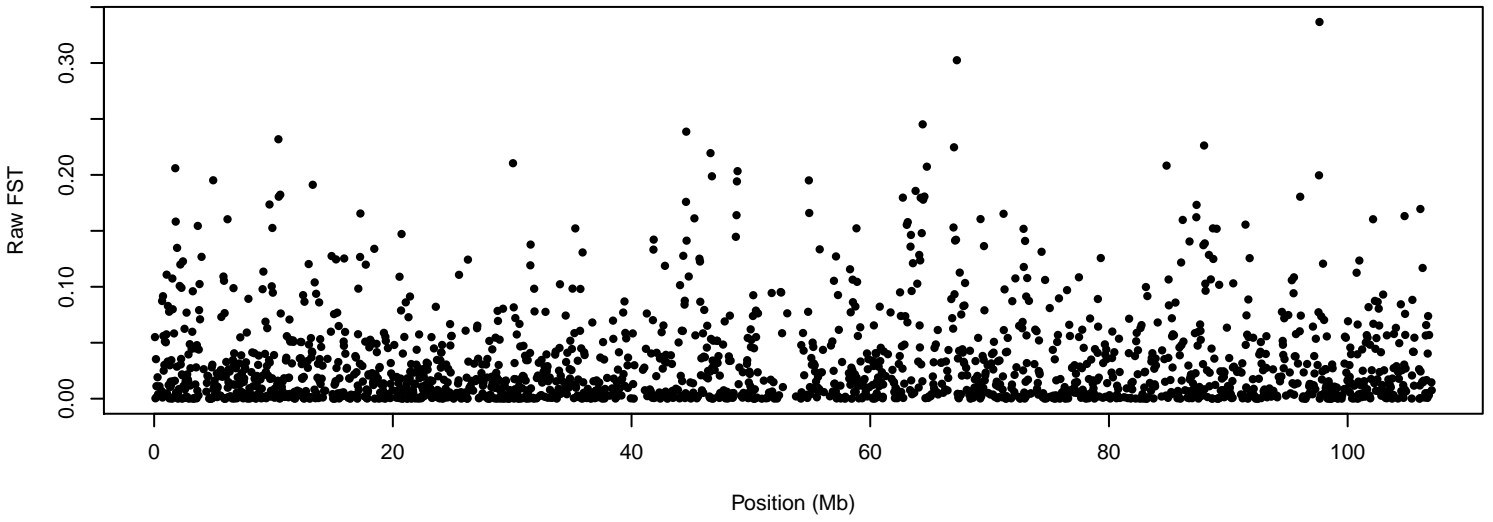

**LOWESS BTA 11**

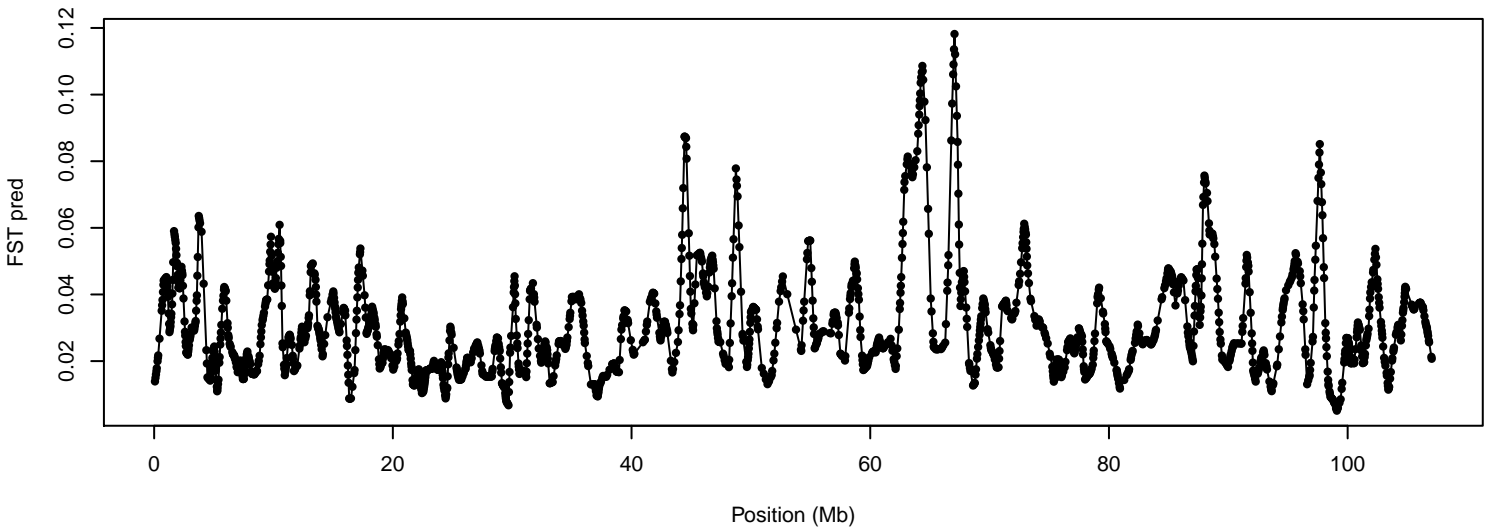

**Control Chart BTA 11**

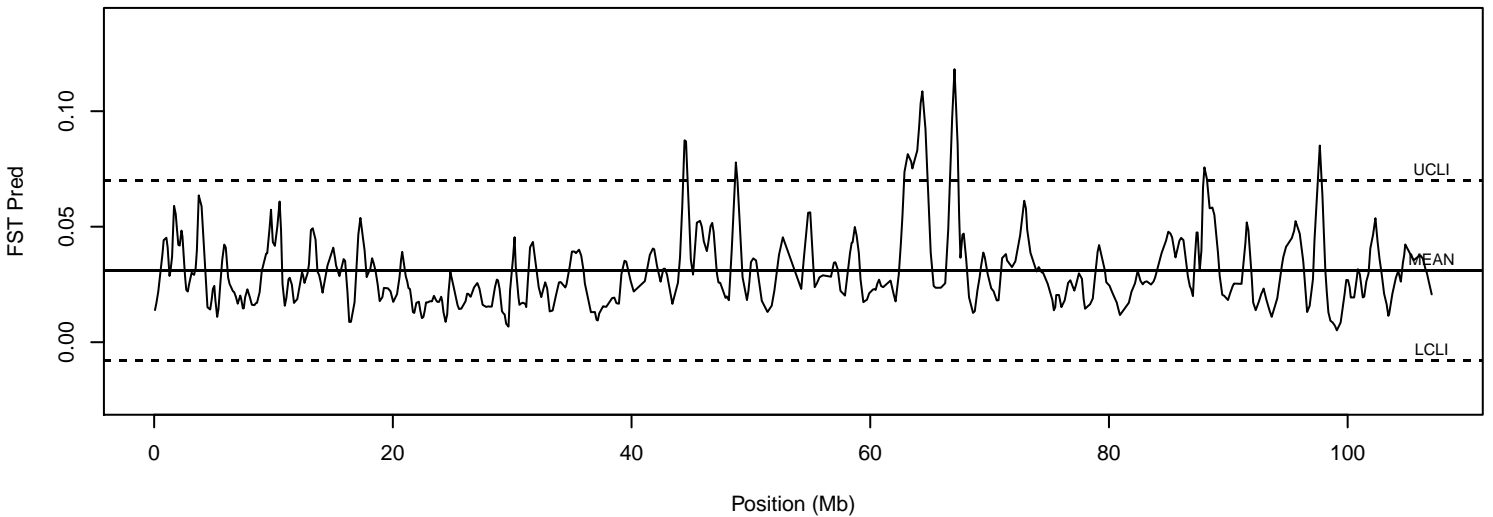

**FST BTA 12**

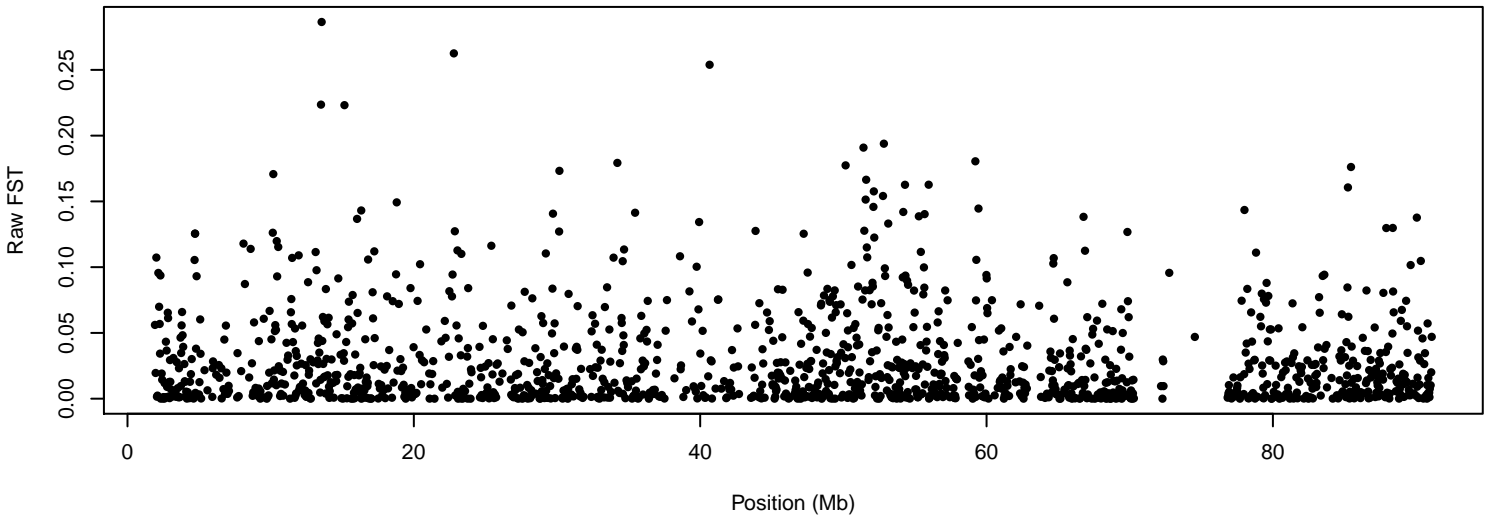

**LOWESS BTA 12**

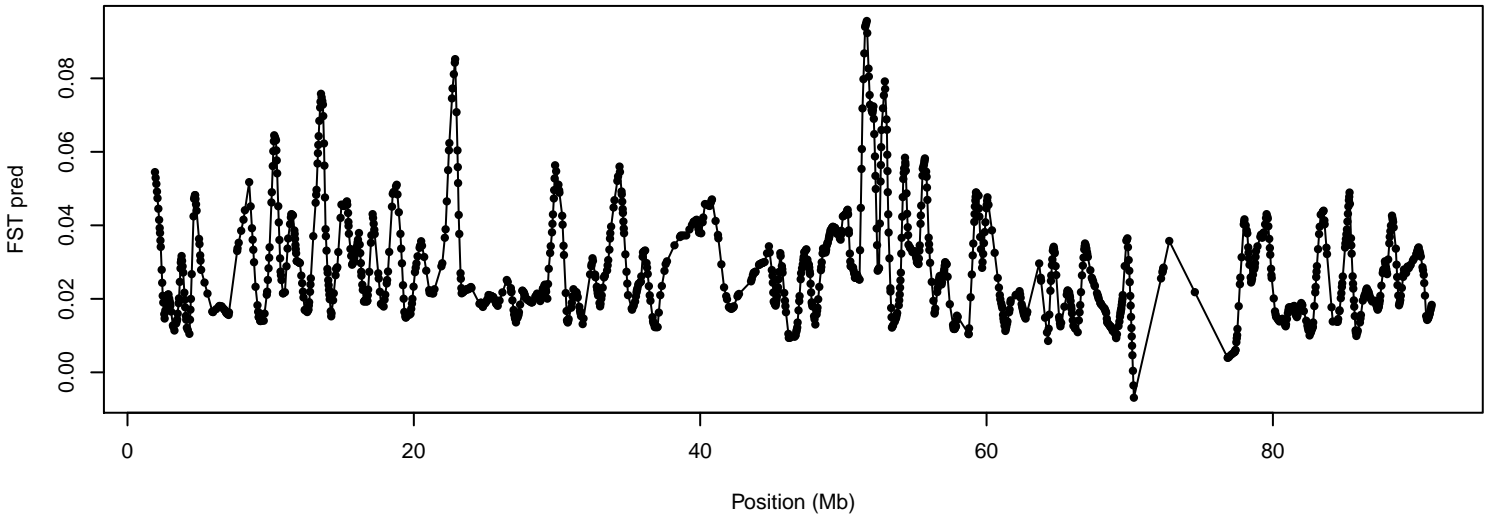

**Control Chart BTA 12**

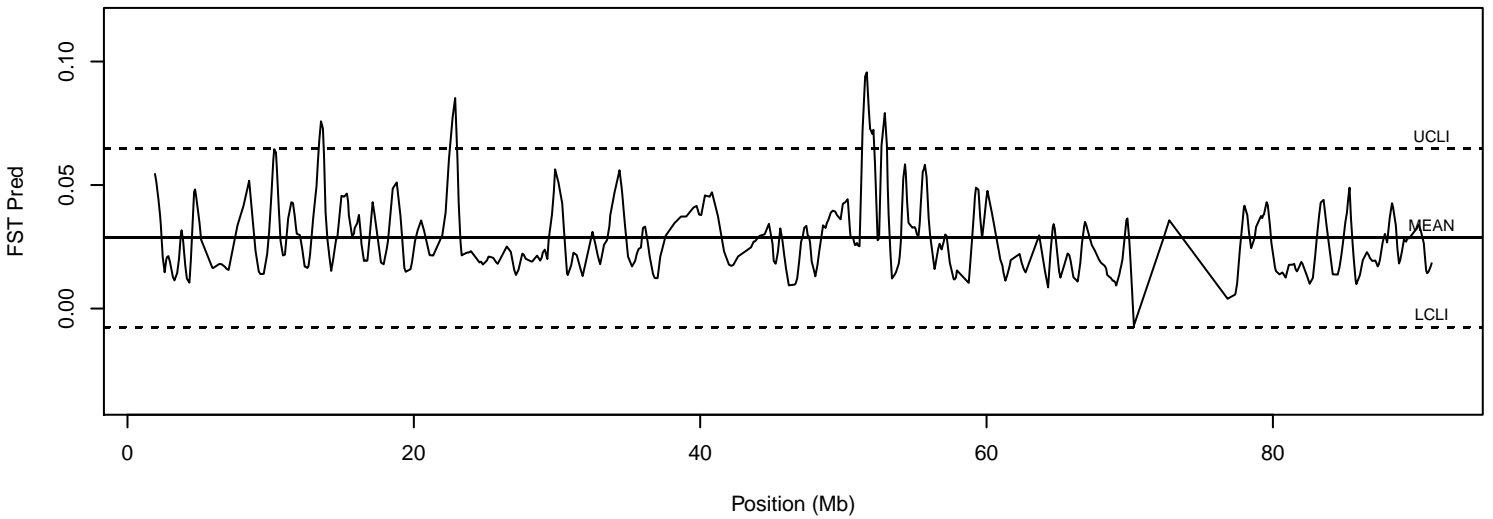

**FST BTA 13**

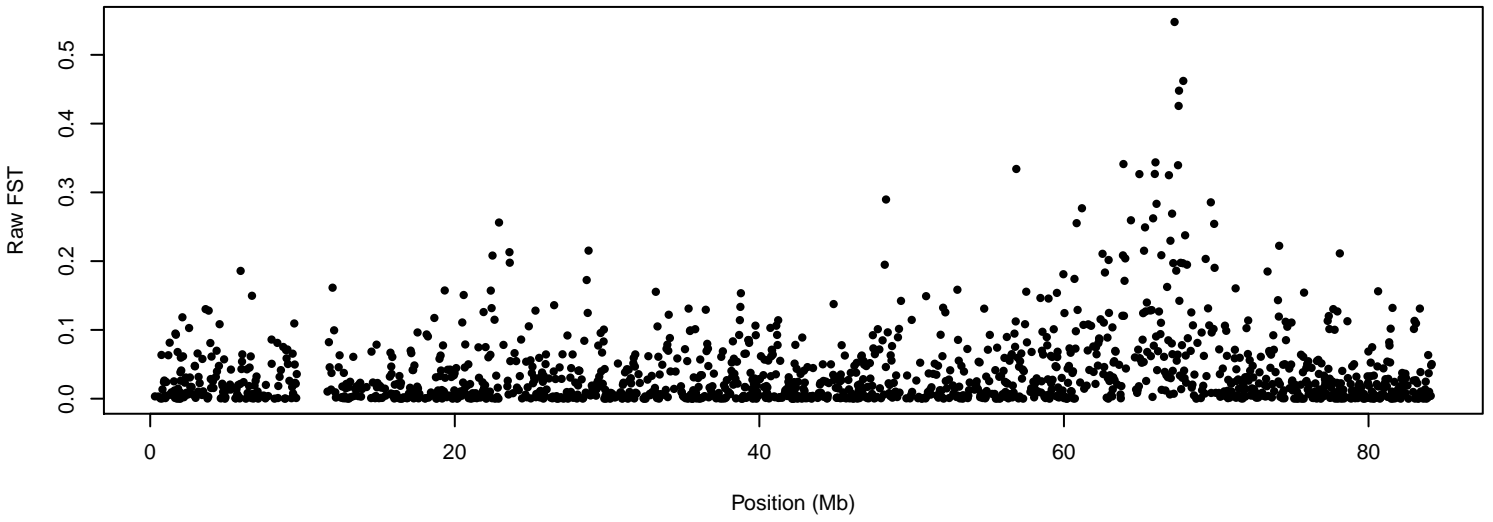

**LOWESS BTA 13**

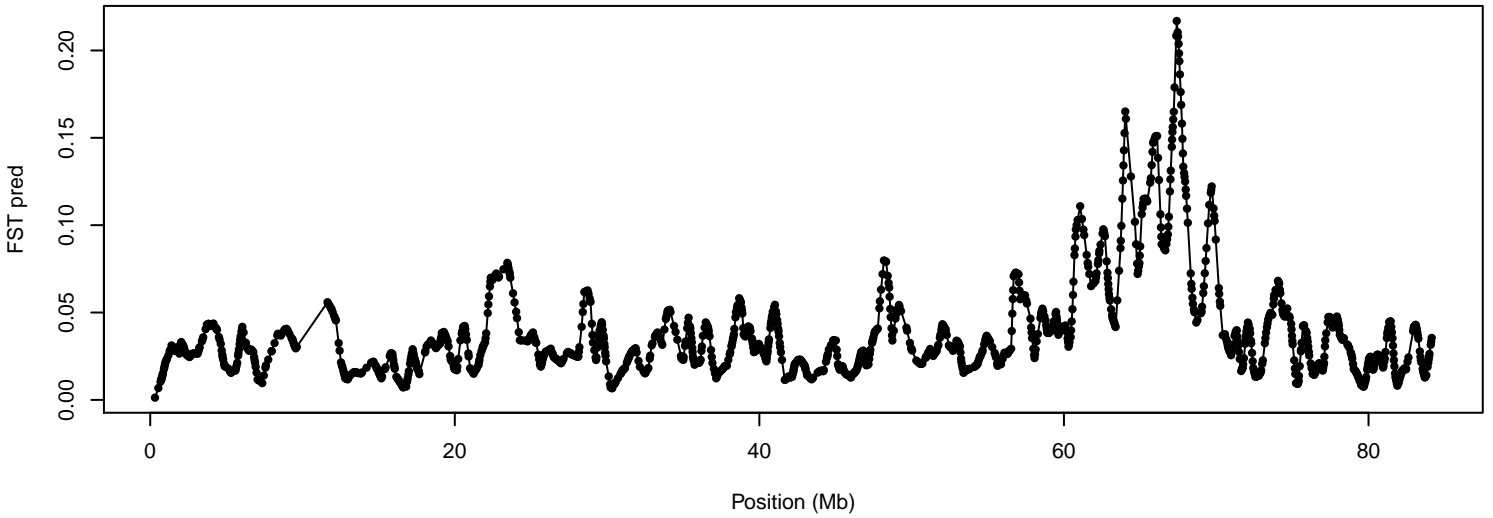

**Control Chart BTA 13**

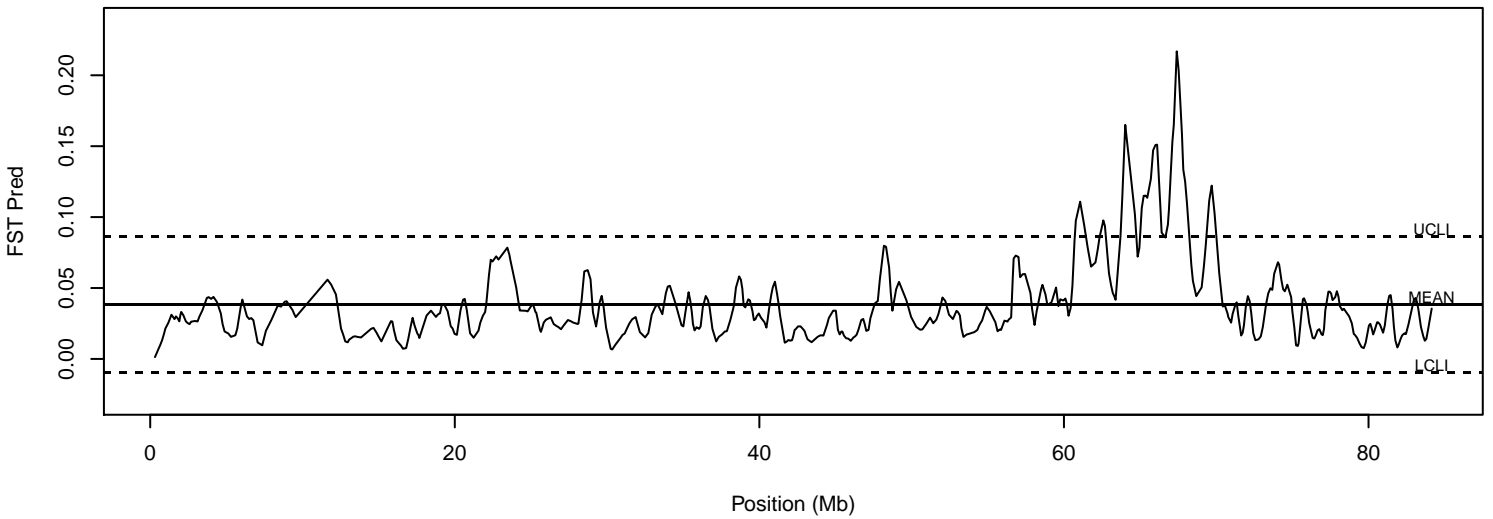

**FST BTA 14**

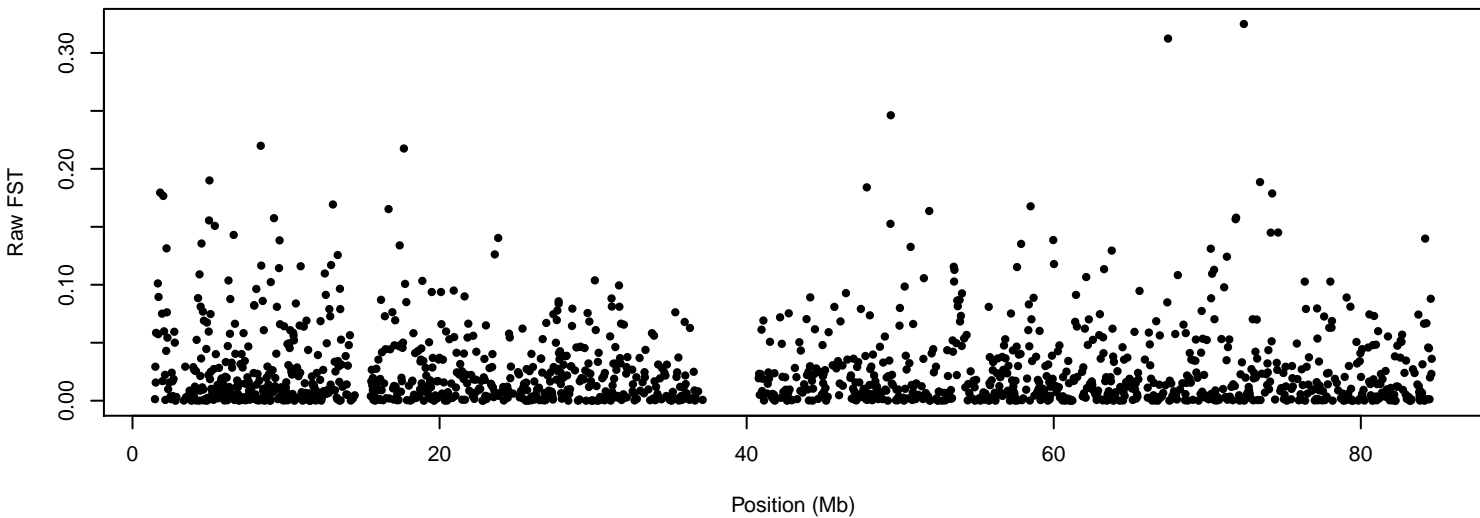

**LOWESS BTA 14**

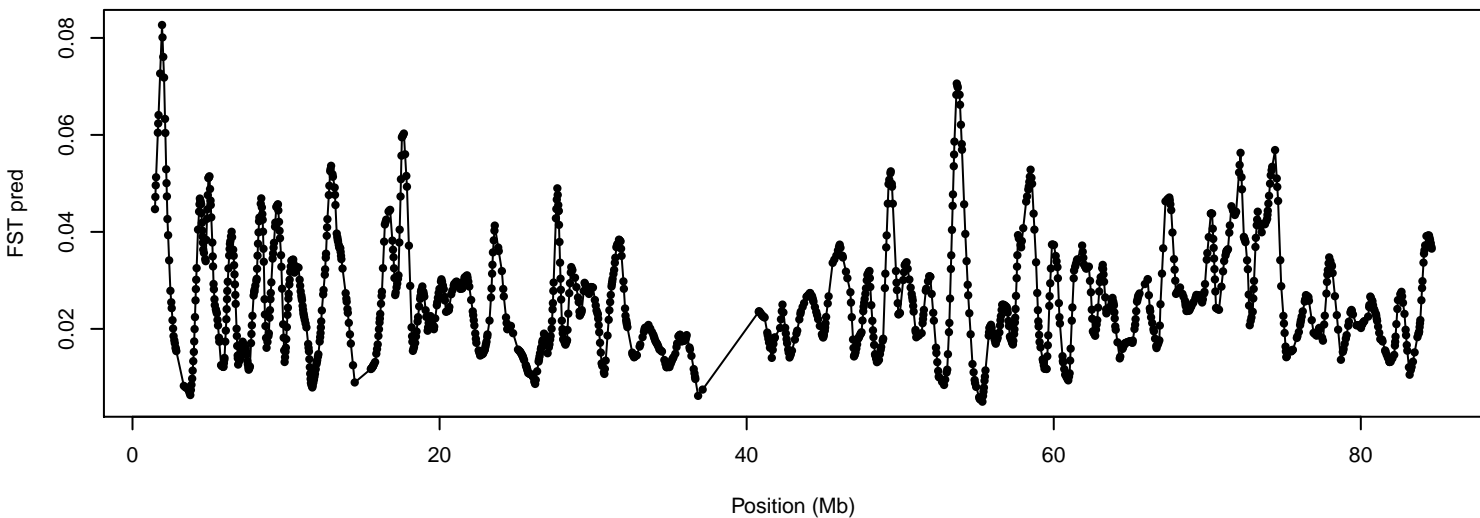

**Control Chart BTA 14**

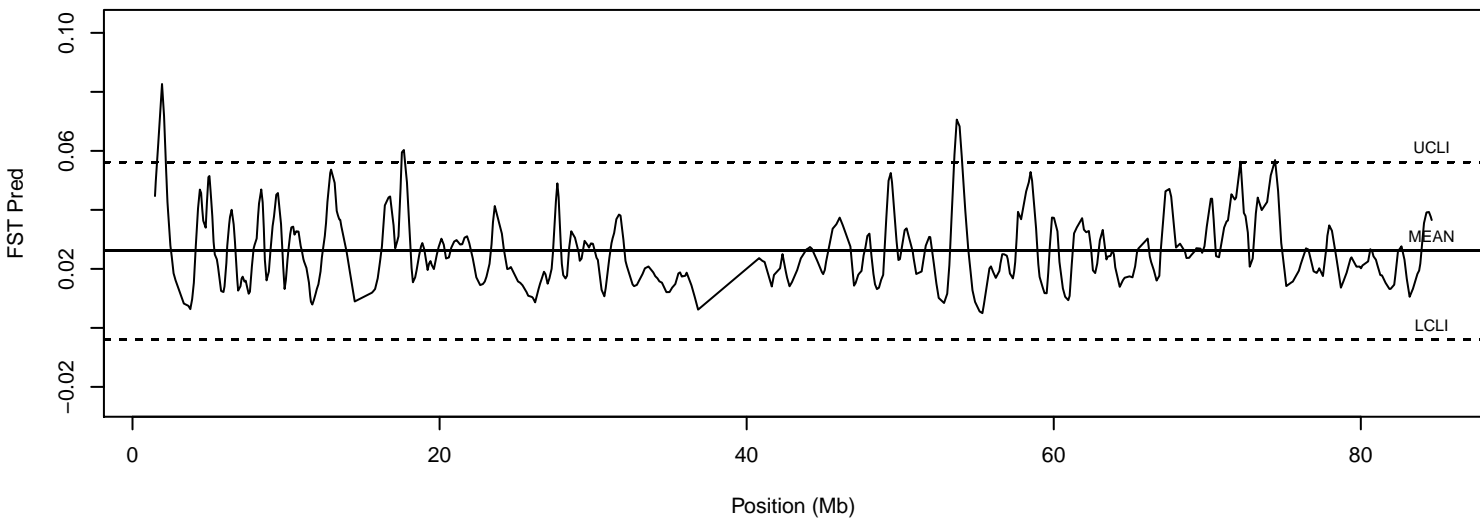

**FST BTA 15**

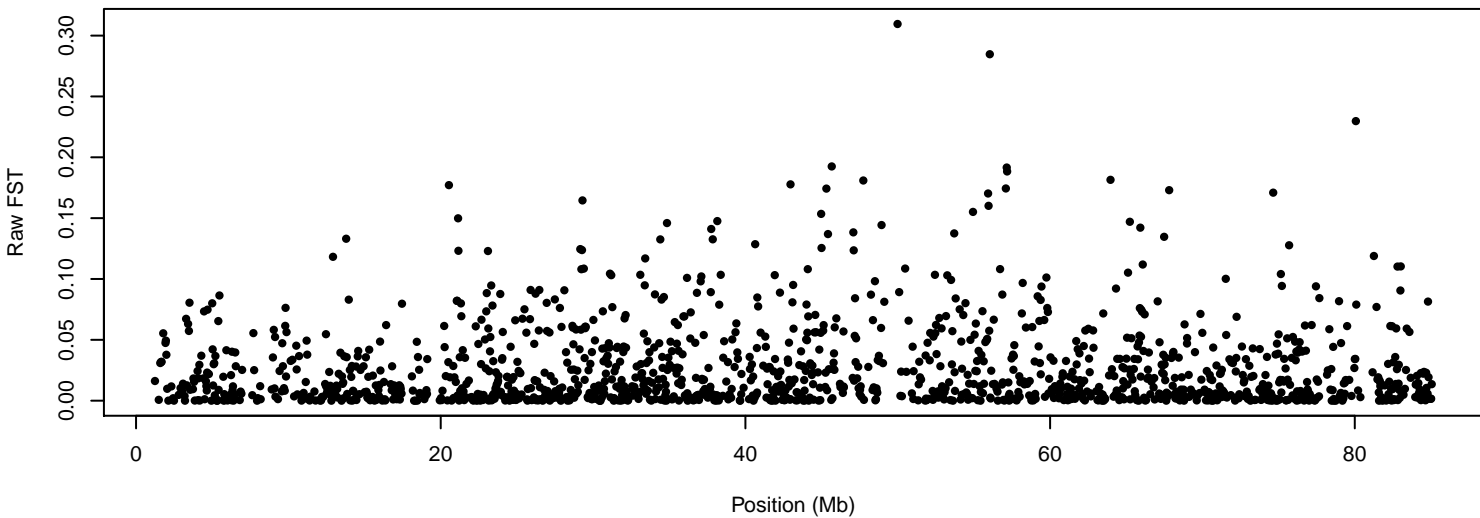

**LOWESS BTA 15**

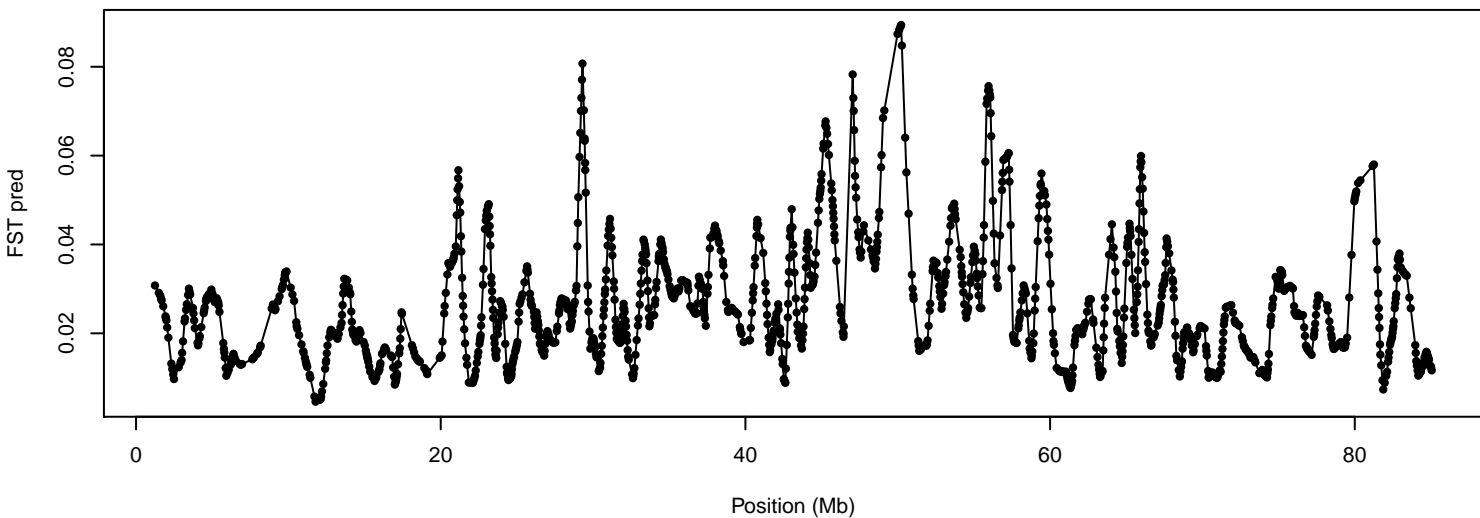

**Control Chart BTA 15**

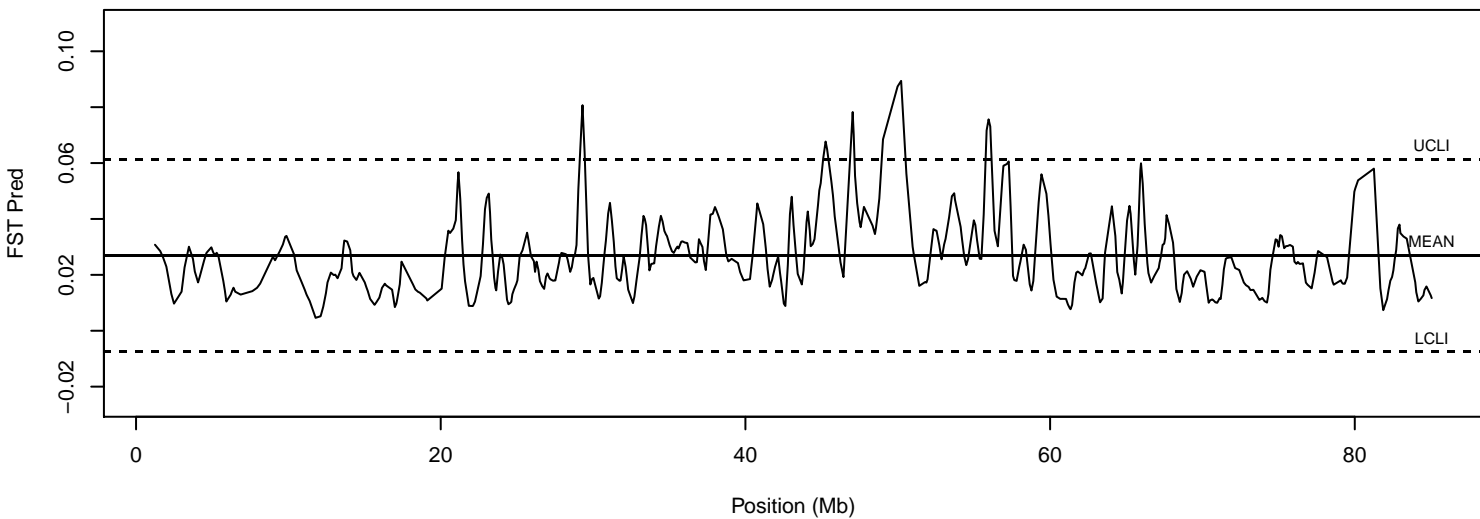

**FST BTA 16**

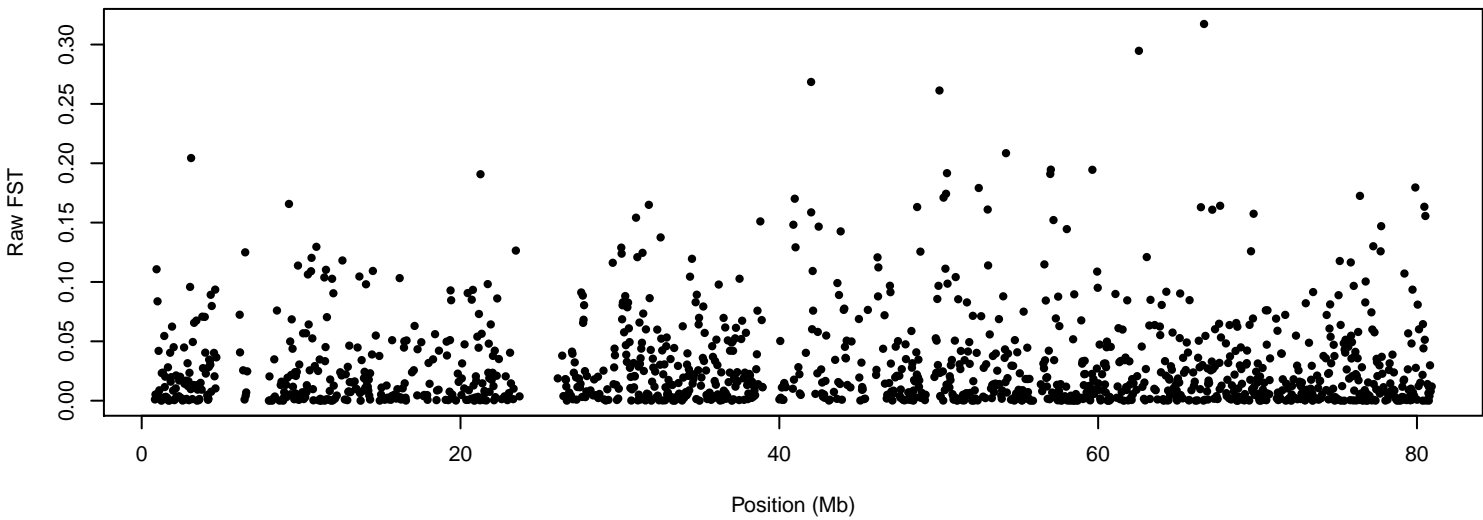

**LOWESS BTA 16**

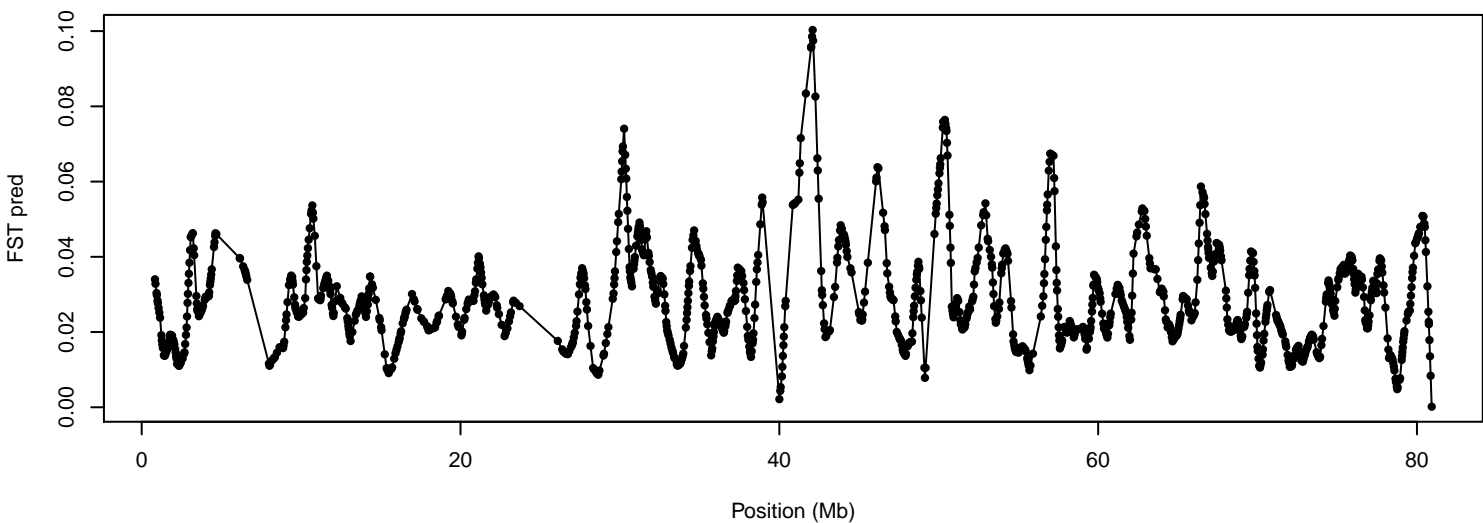

**Control Chart BTA 16**

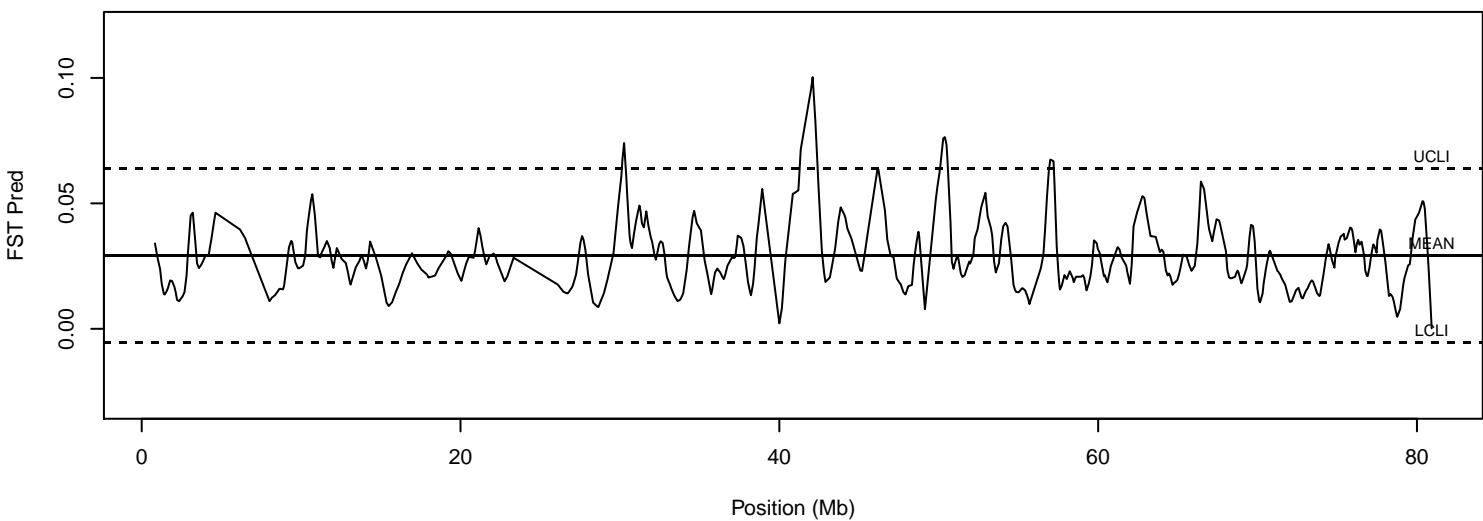



**FST BTA 17**

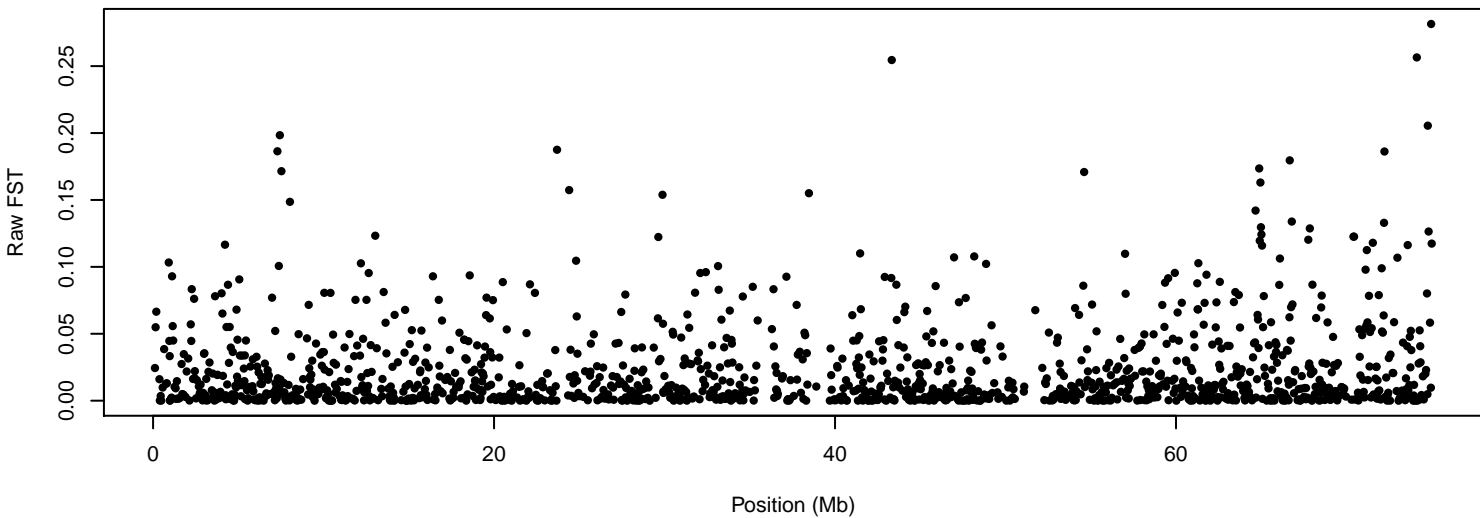

**LOWESS BTA 17**

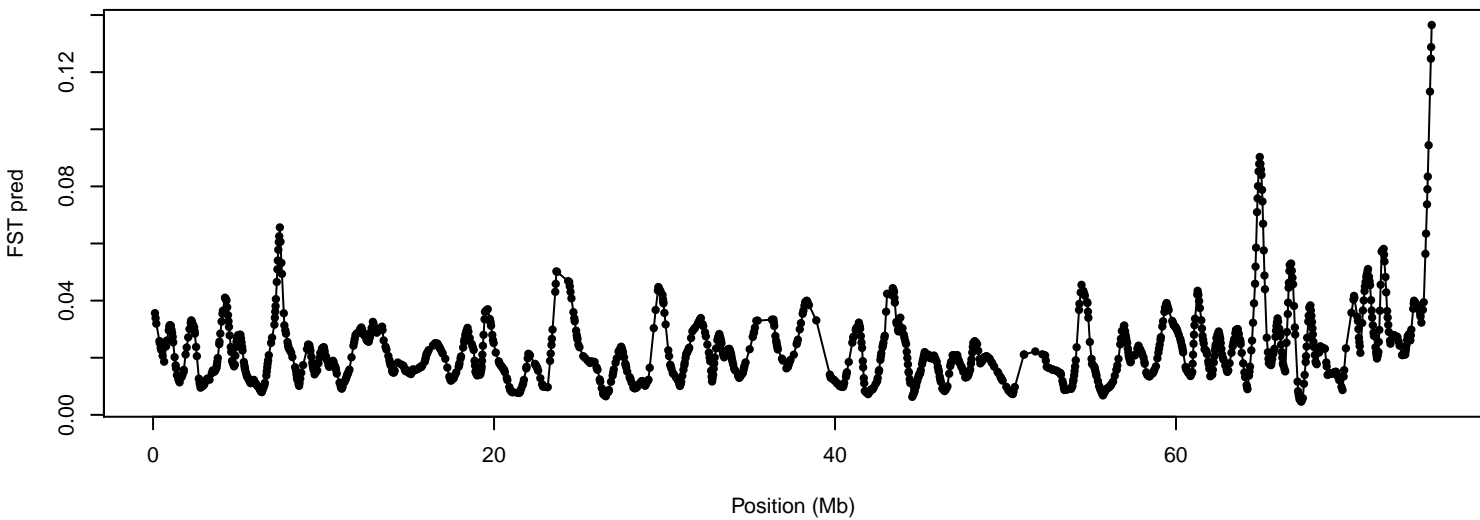

**Control Chart BTA 17**

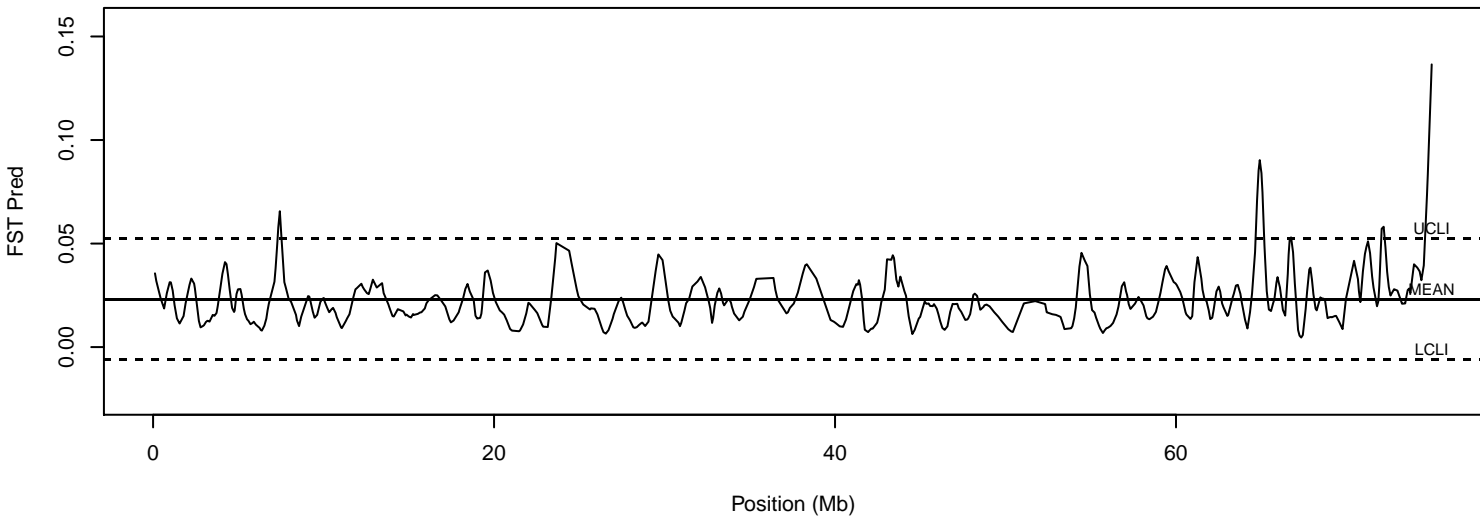

**FST BTA 18**

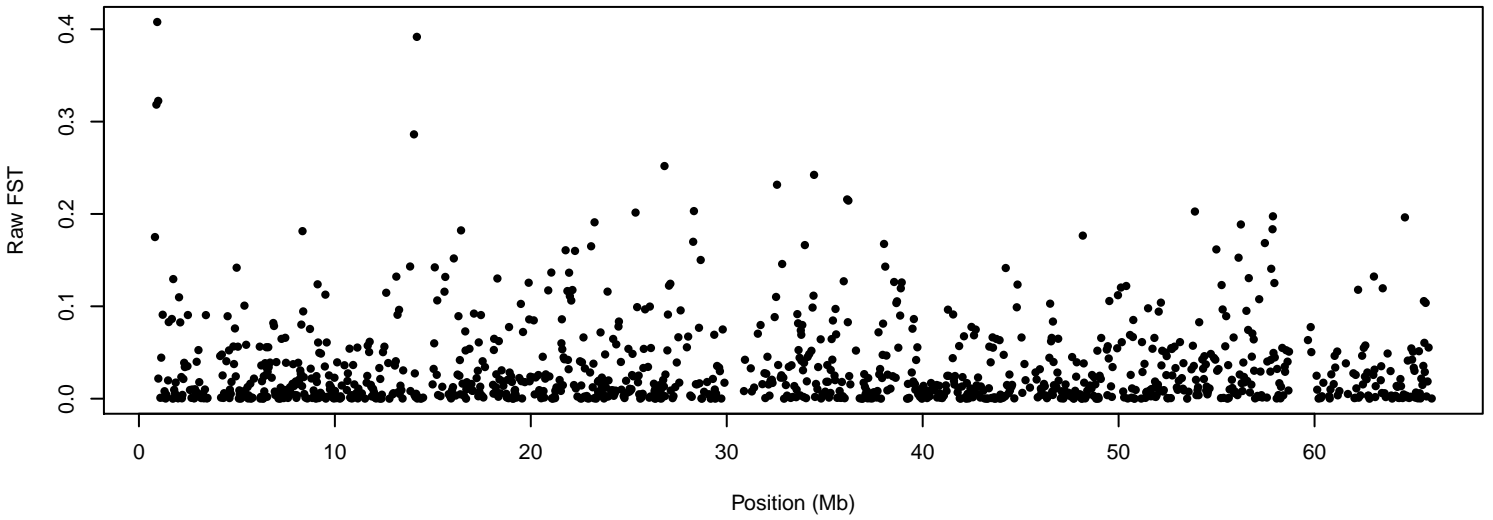

**LOWESS BTA 18**

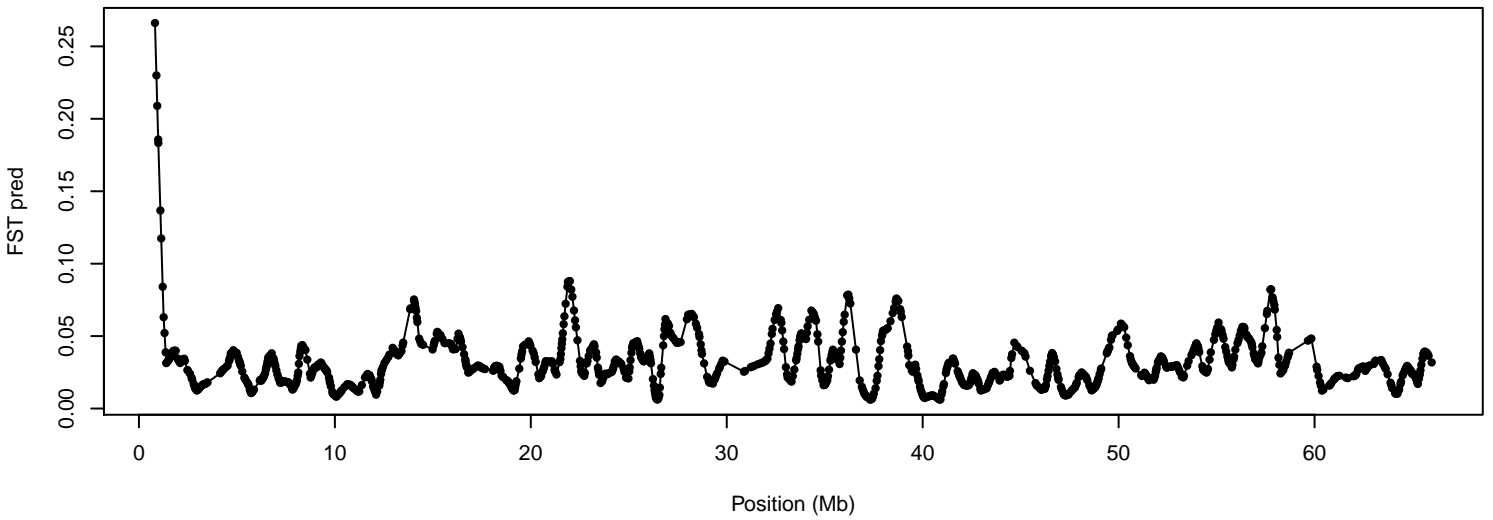

**Control Chart BTA 18**

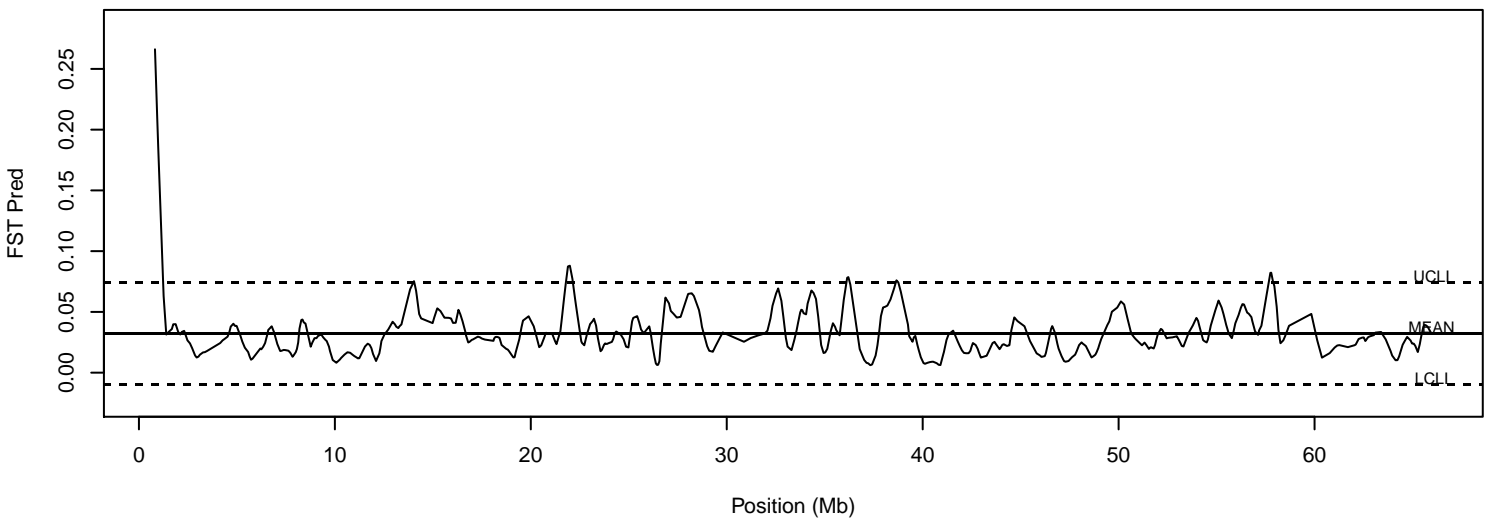

**FST BTA 19**

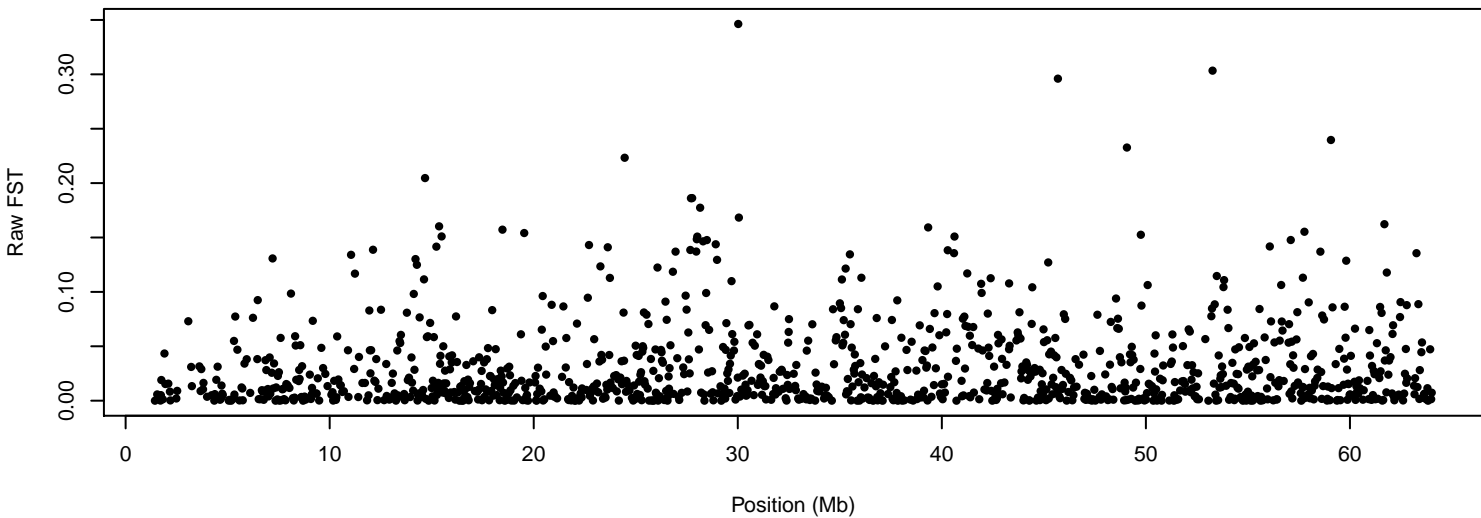

**LOWESS BTA 19**

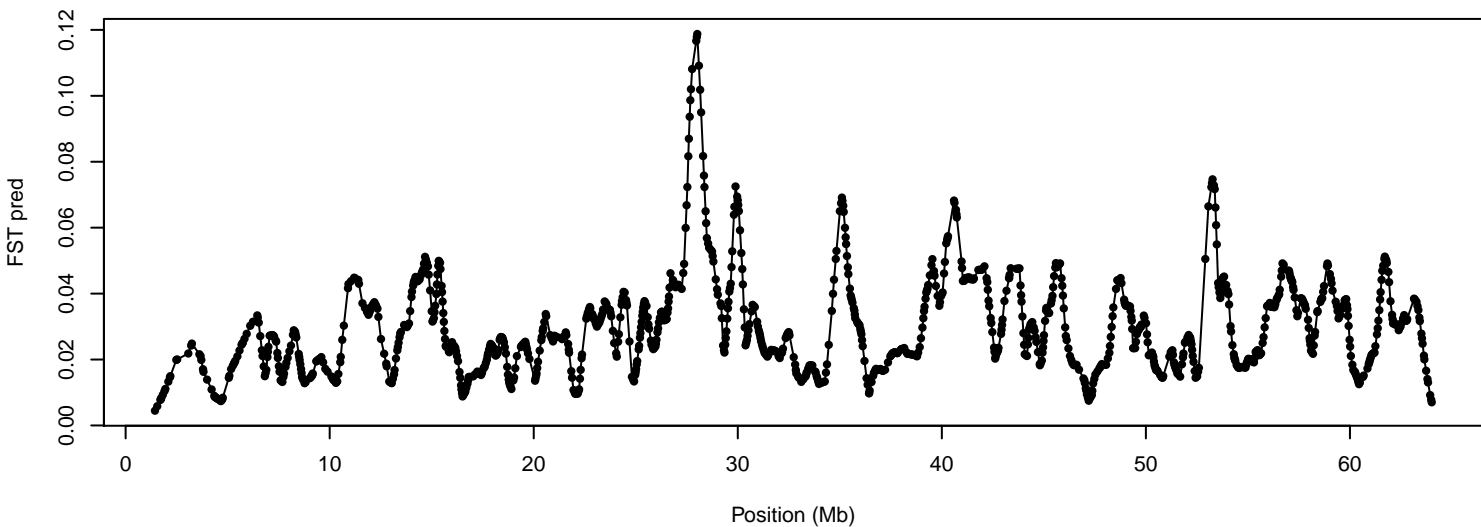

**Control Chart BTA 19**

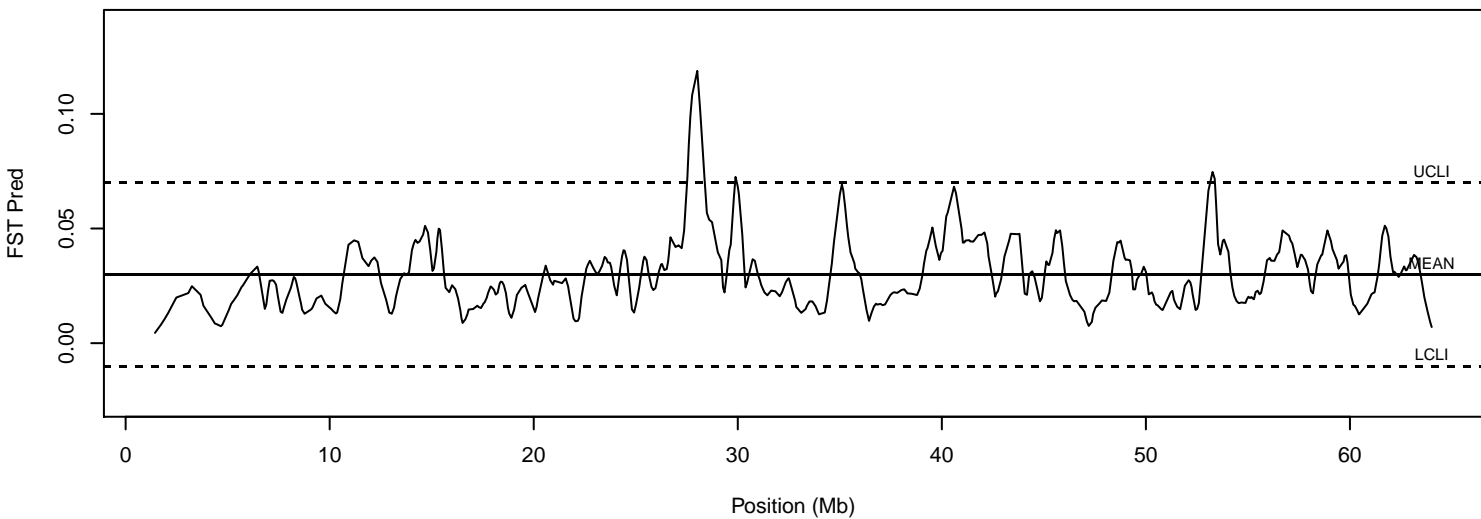

**FST BTA 20**

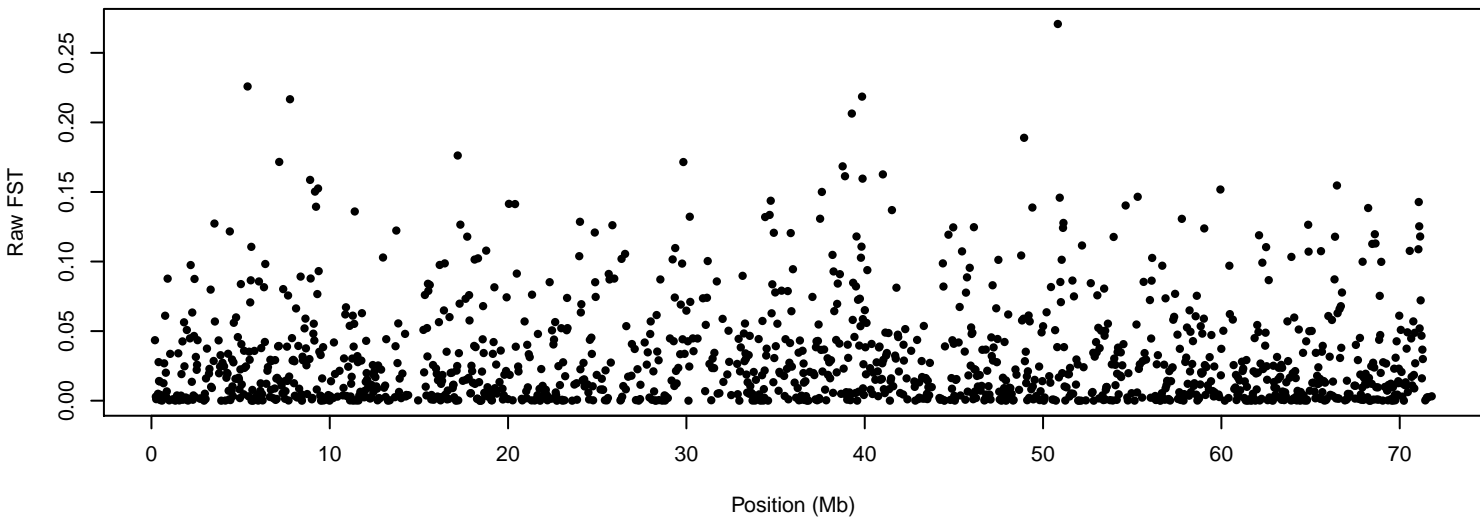

**LOWESS BTA 20**

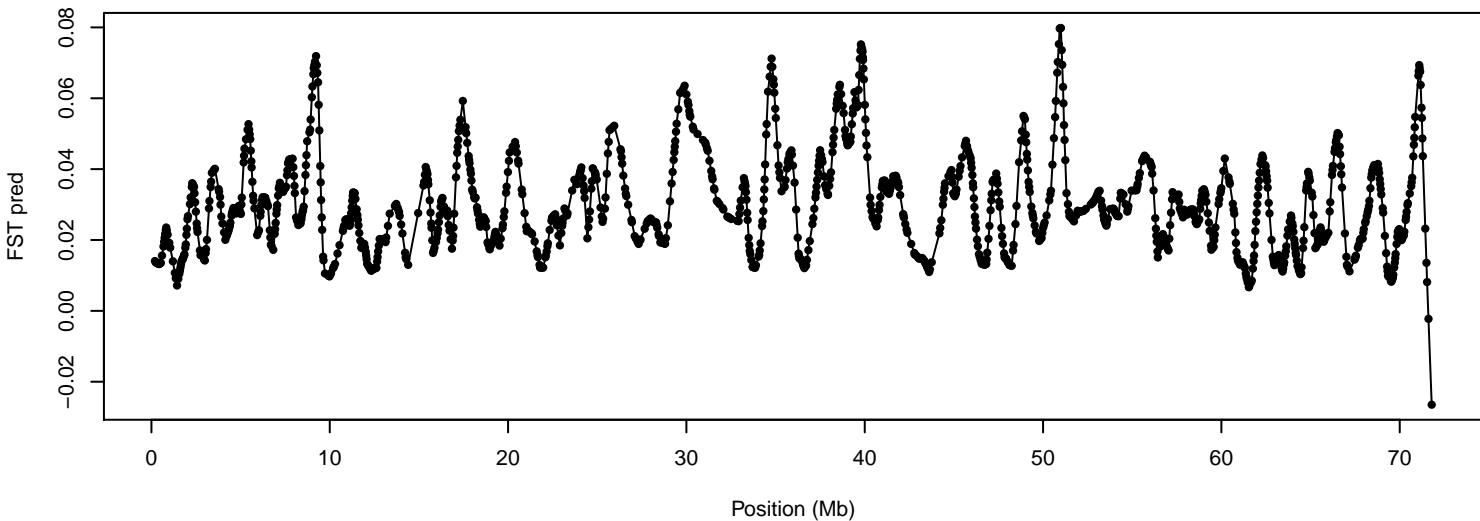

**Control Chart BTA 20**

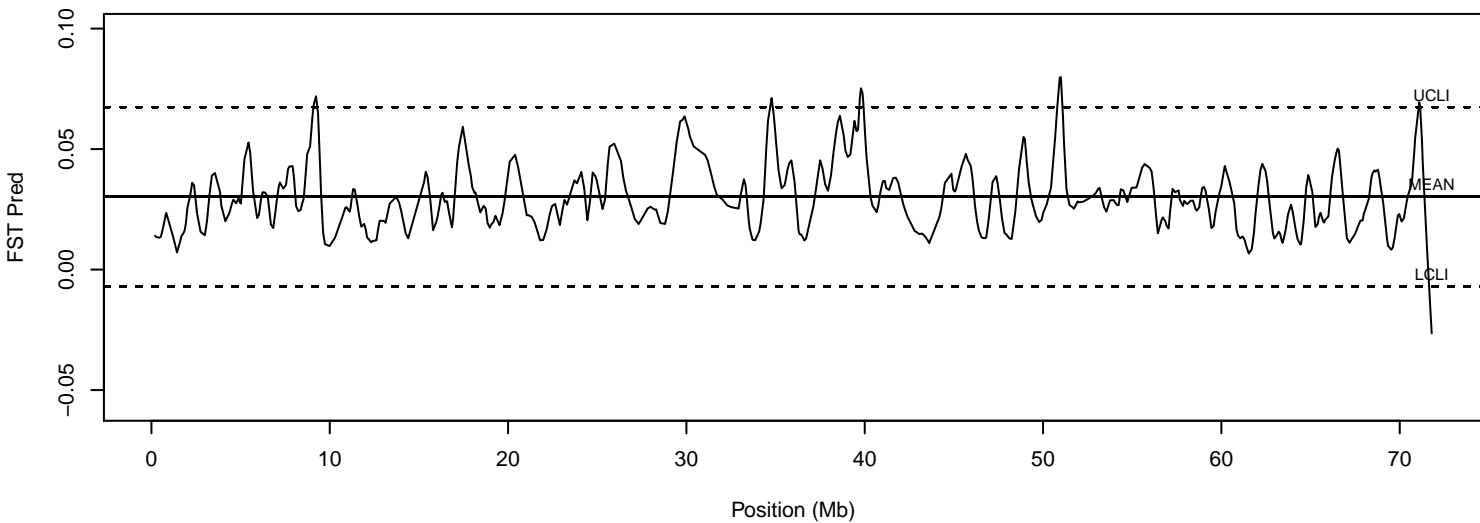

**FST BTA 21**

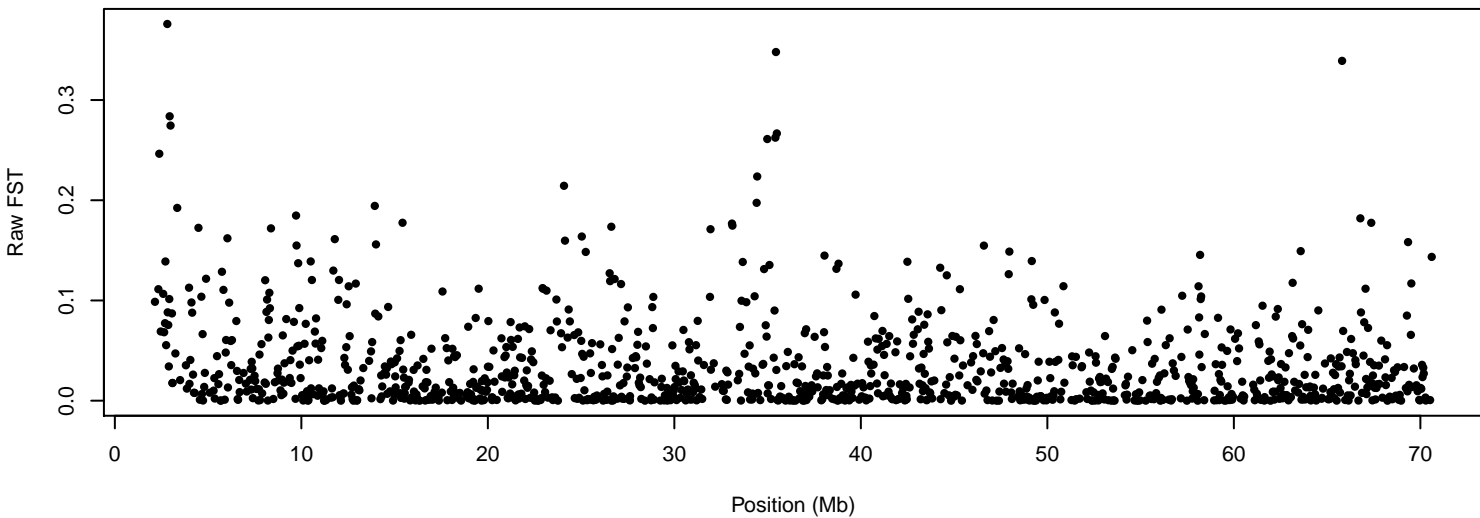

**LOWESS BTA 21**

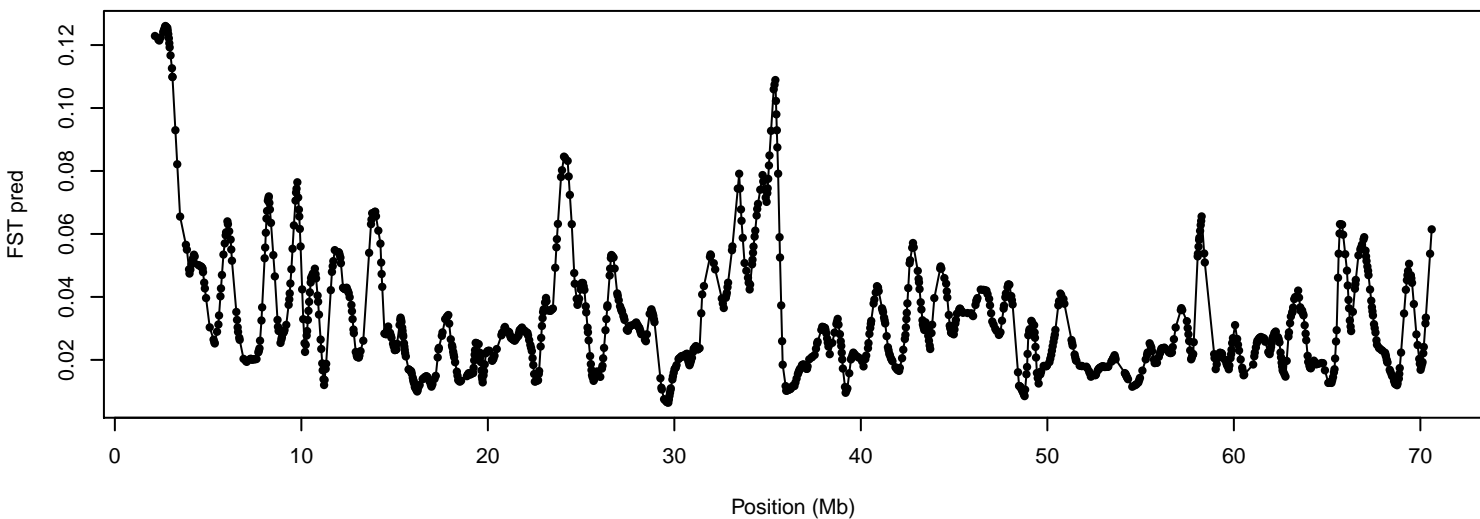

**Control Chart BTA 21**

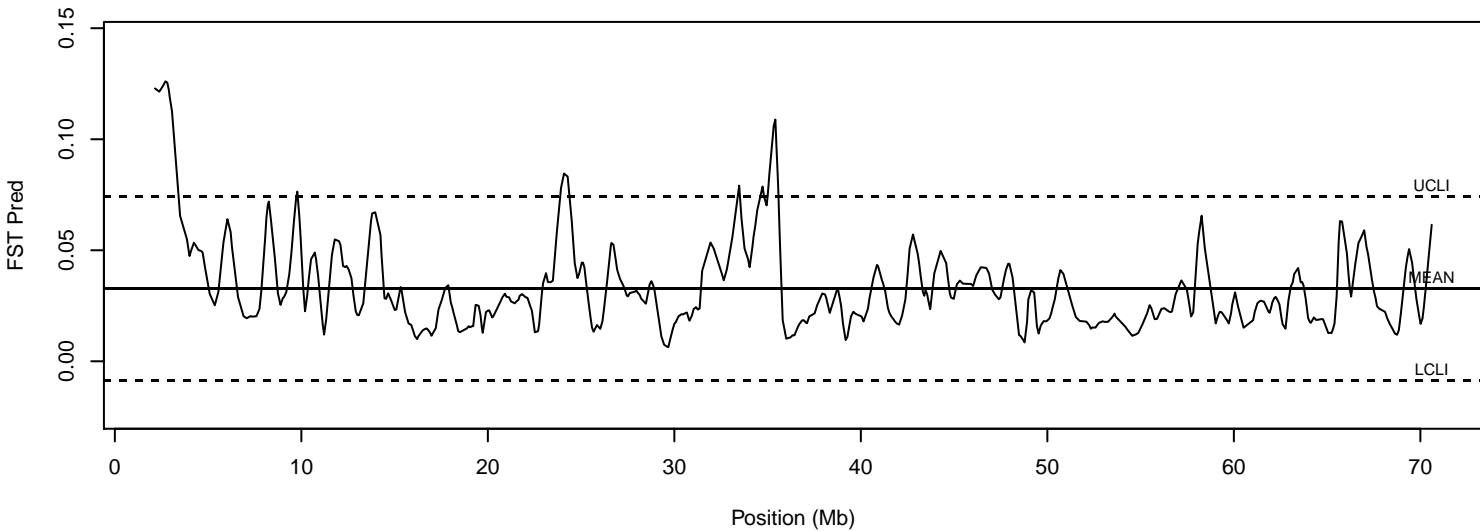

**FST BTA 22**

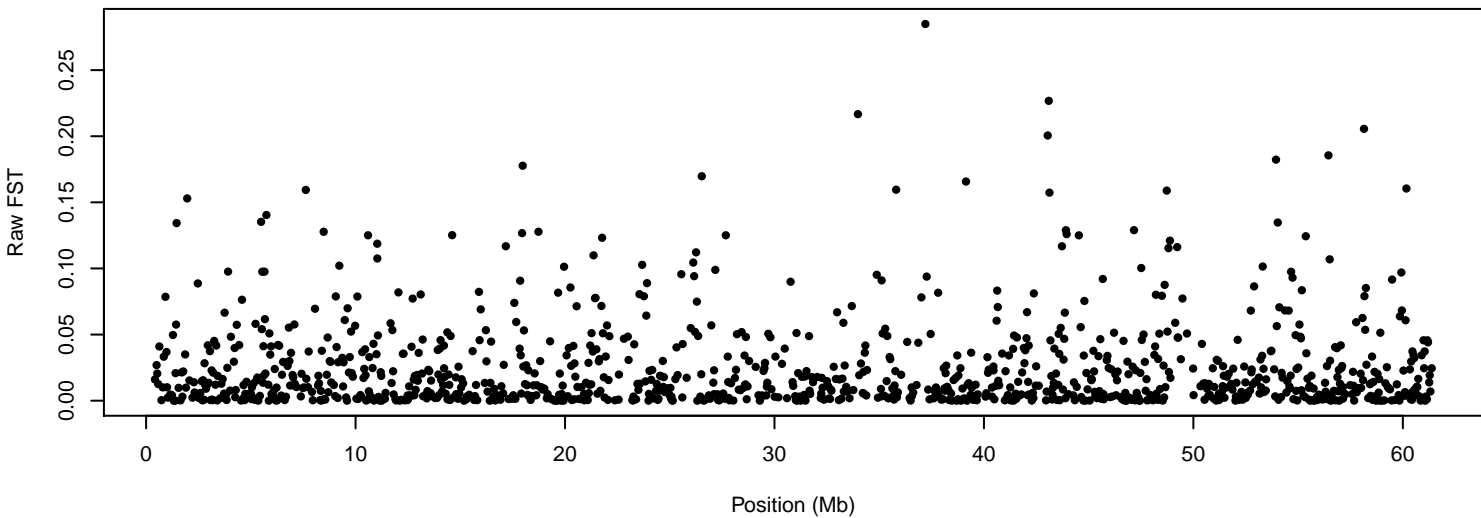

**LOWESS BTA 22**

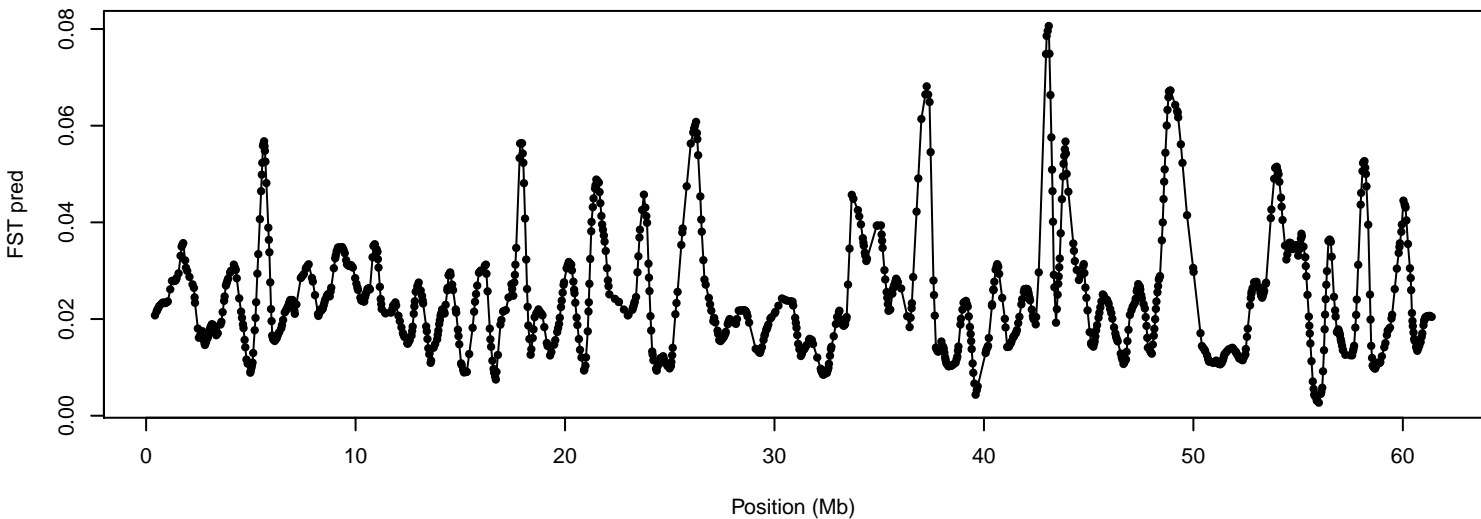

**Control Chart BTA 22**

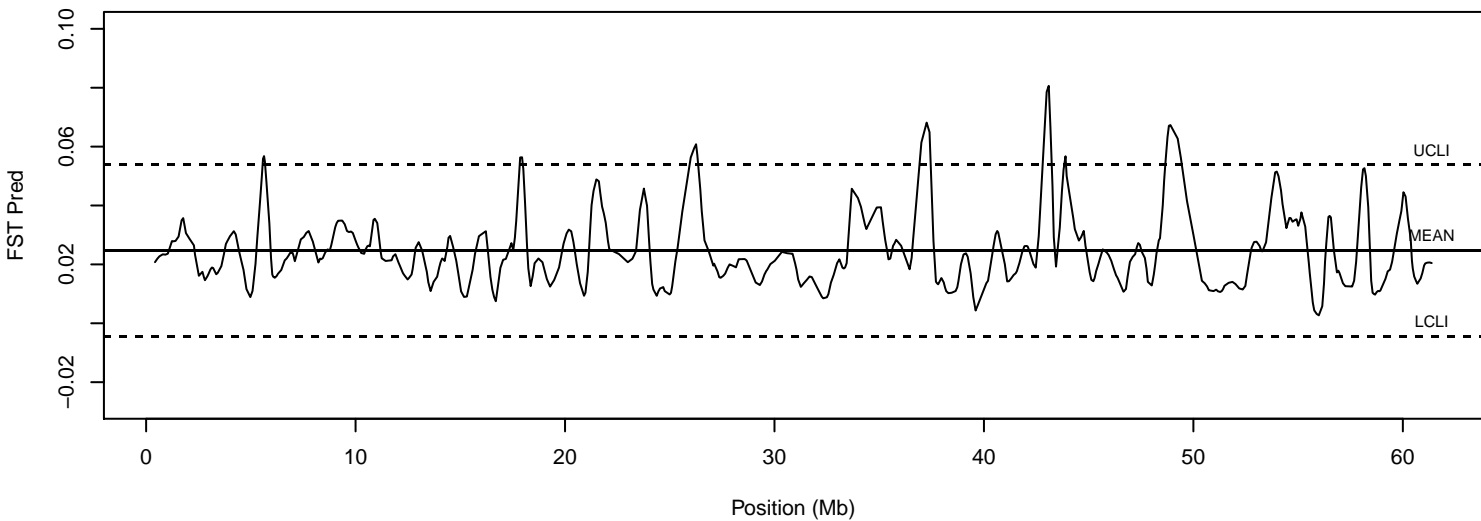

**FST BTA 23**

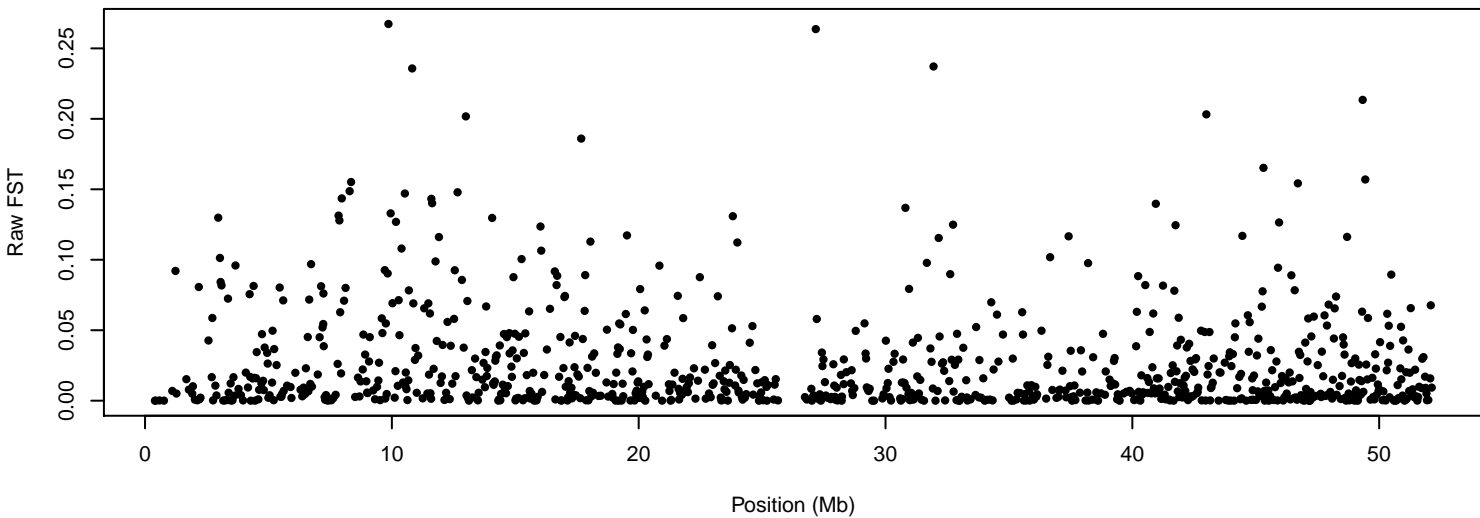

**LOWESS BTA 23**

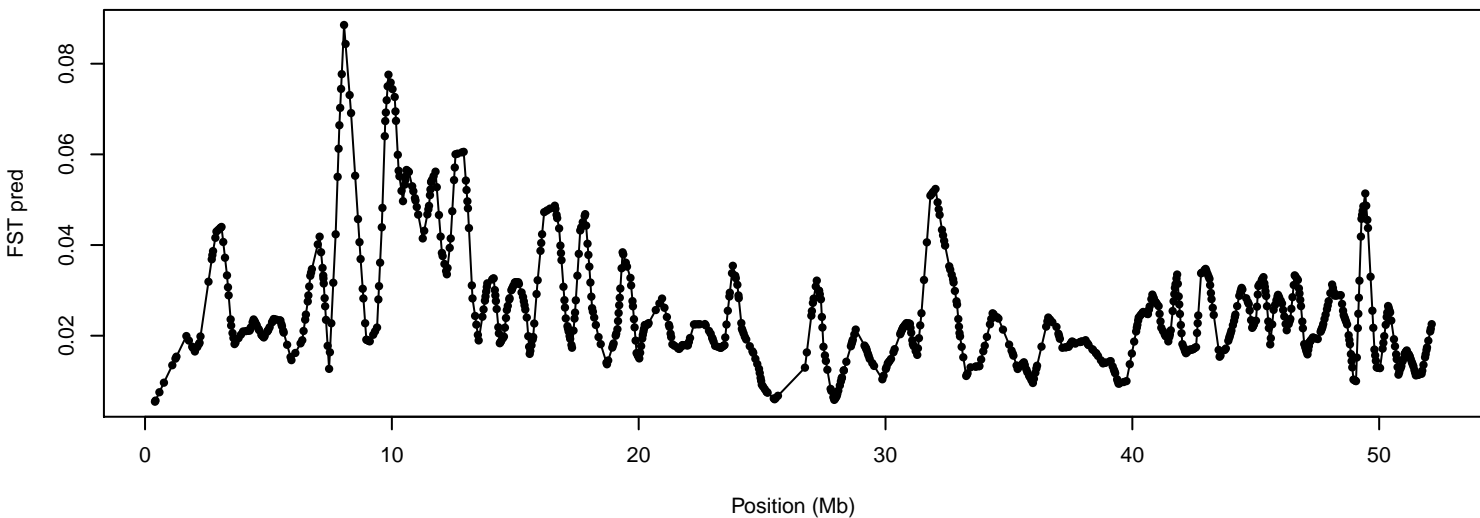

**Control Chart BTA 23**

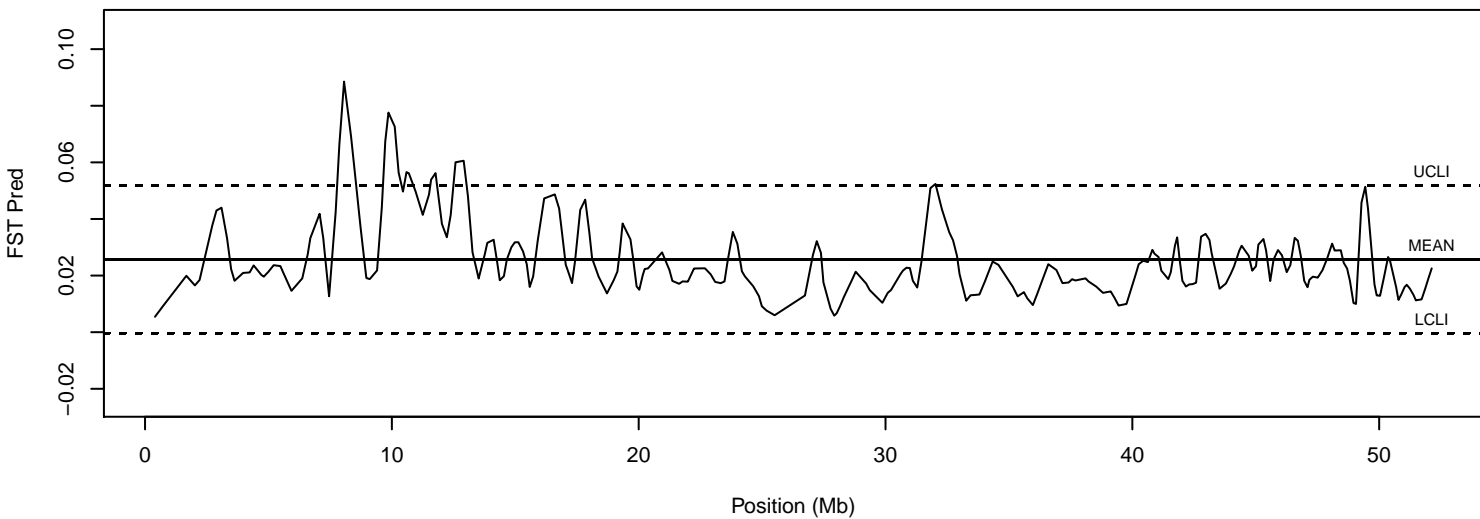

**FST BTA 24**

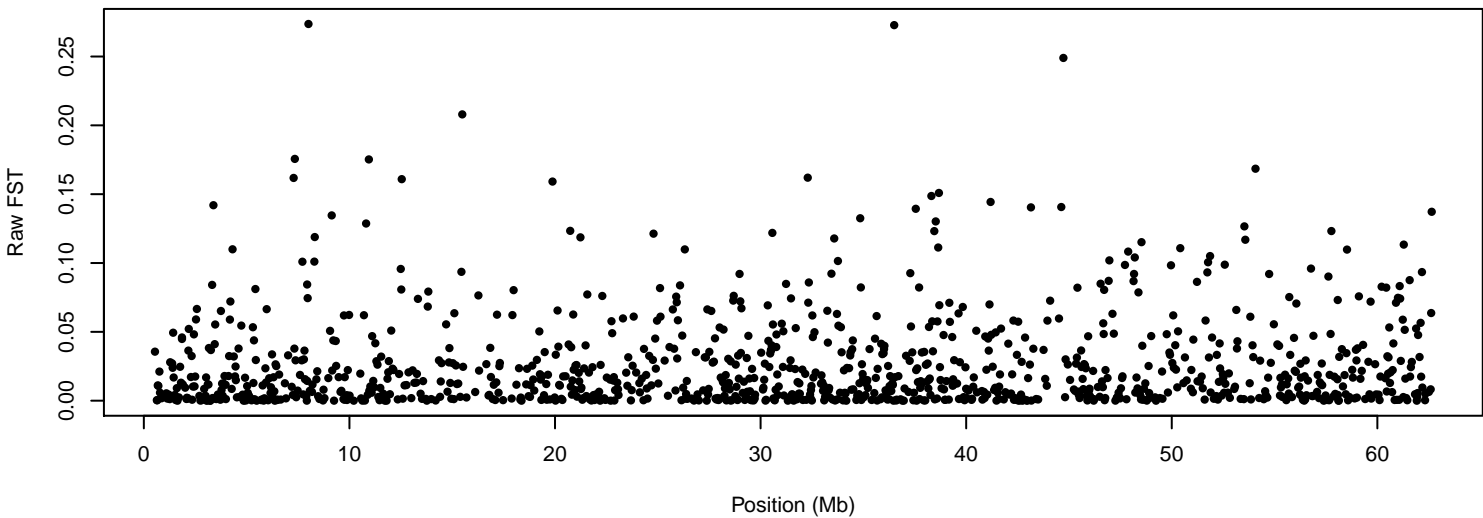

**LOWESS BTA 24**

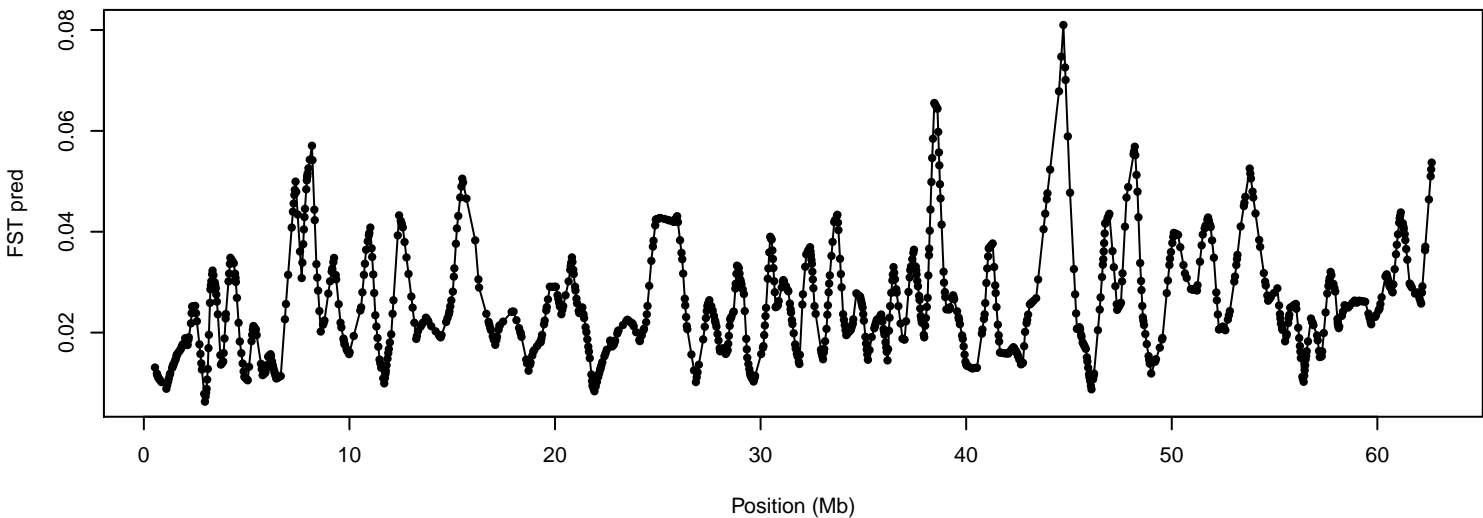

**Control Chart BTA 24**

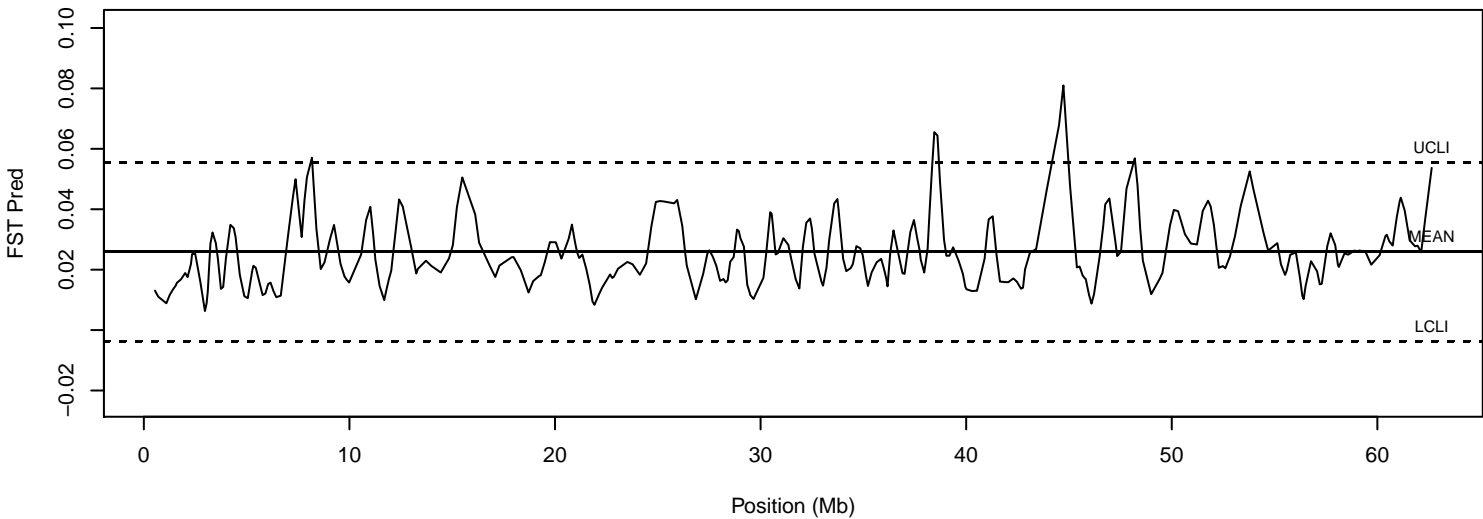



**FST BTA 25**

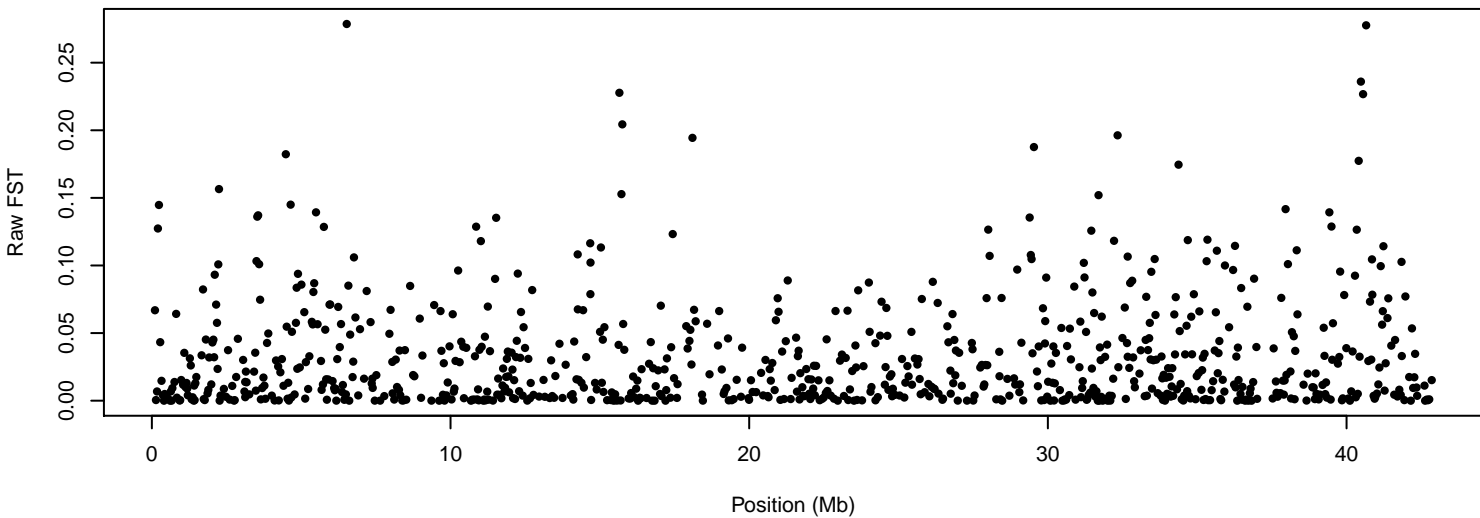

**LOWESS BTA 25**

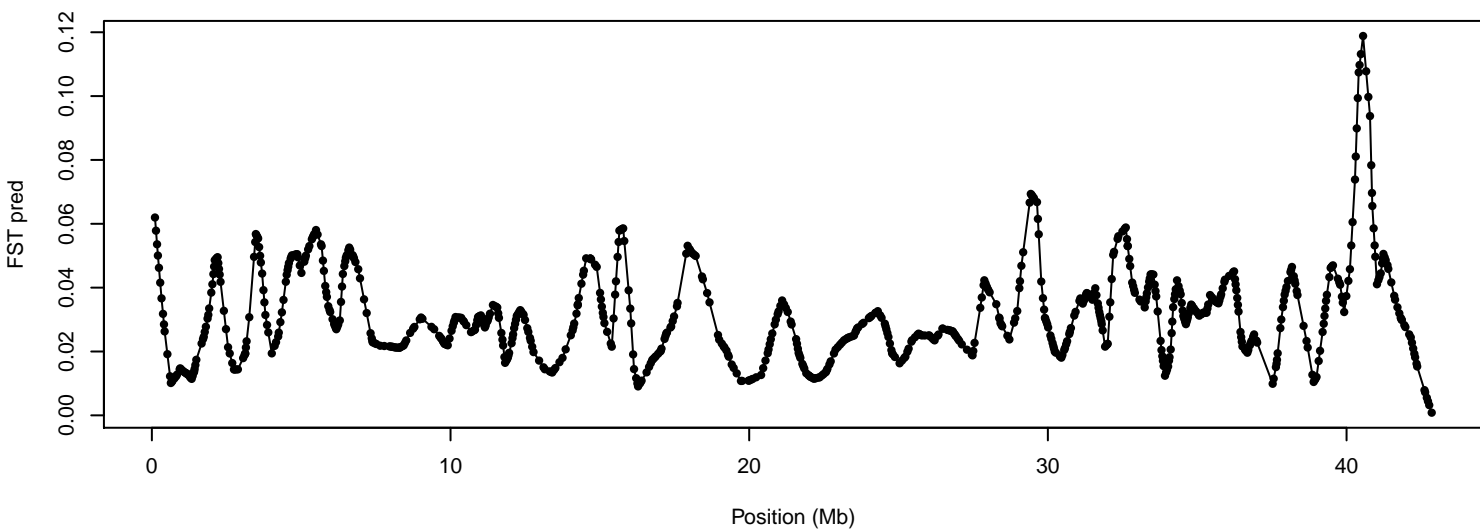

**Control Chart BTA 25**

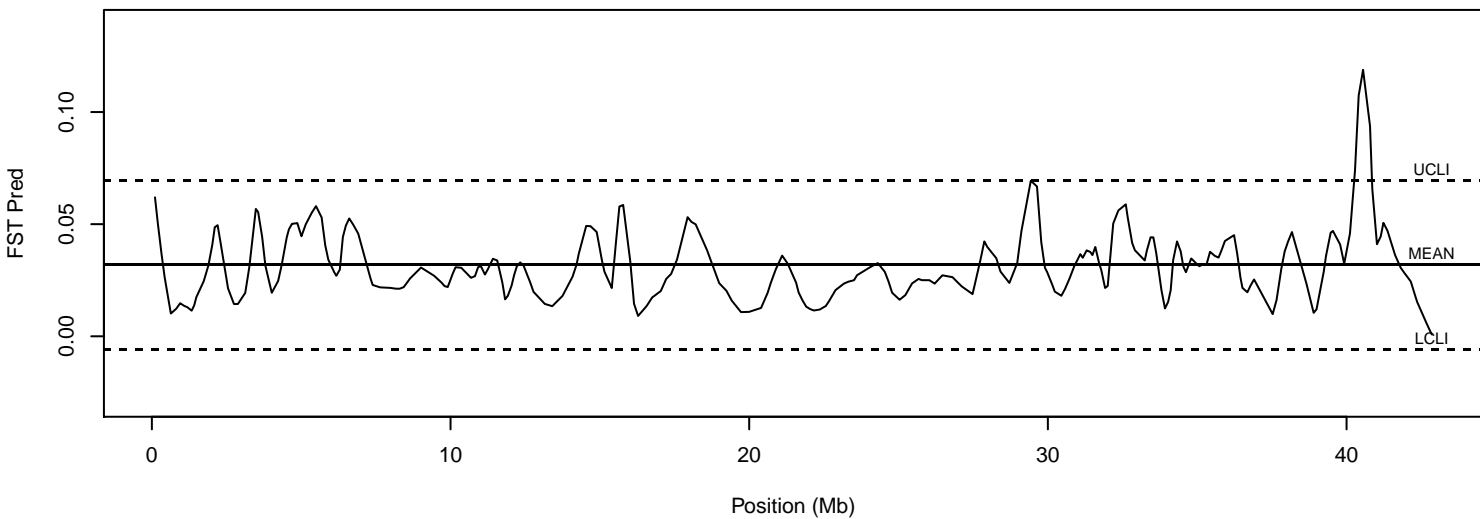

**FST BTA 26**

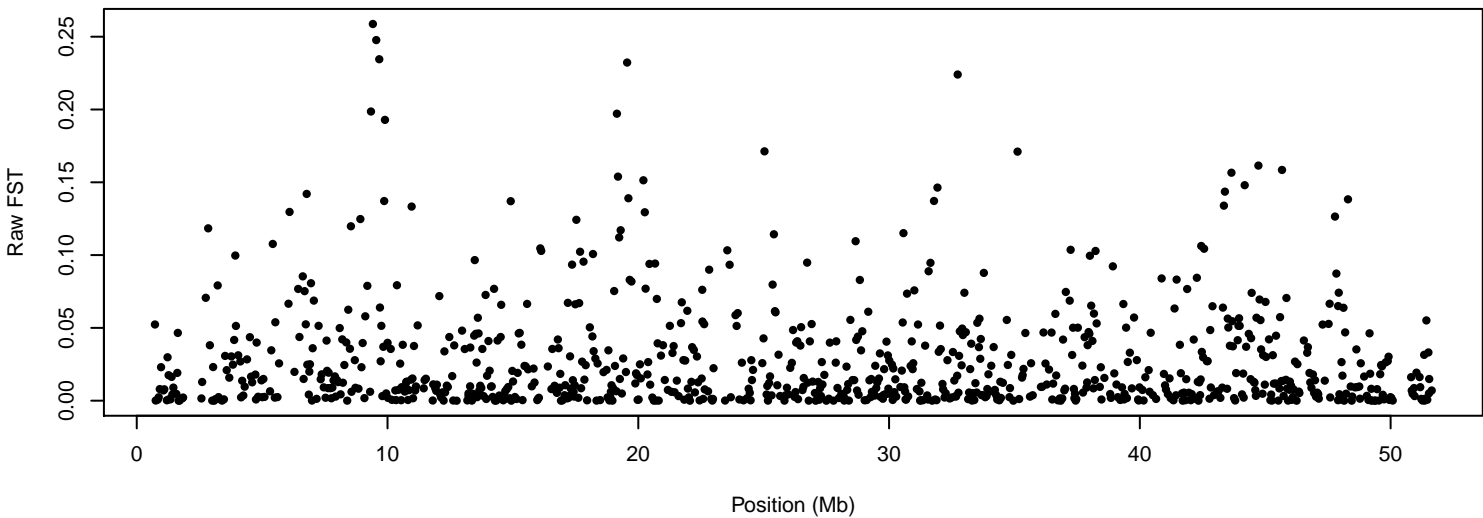

**LOWESS BTA 26**

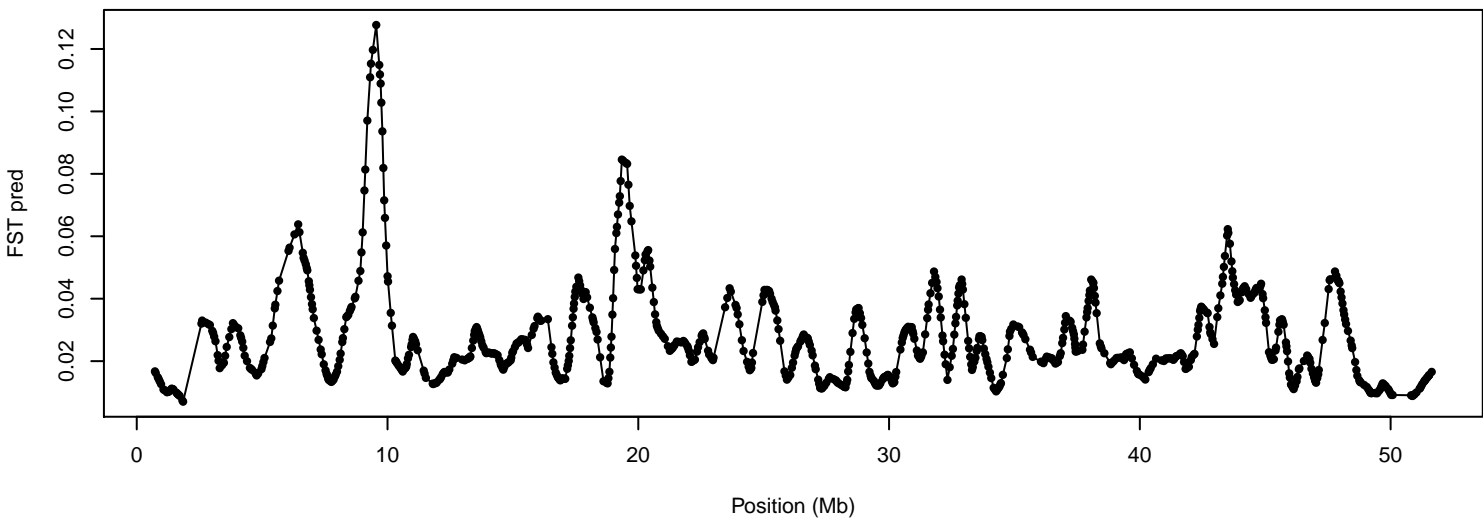

**Control Chart BTA 26**

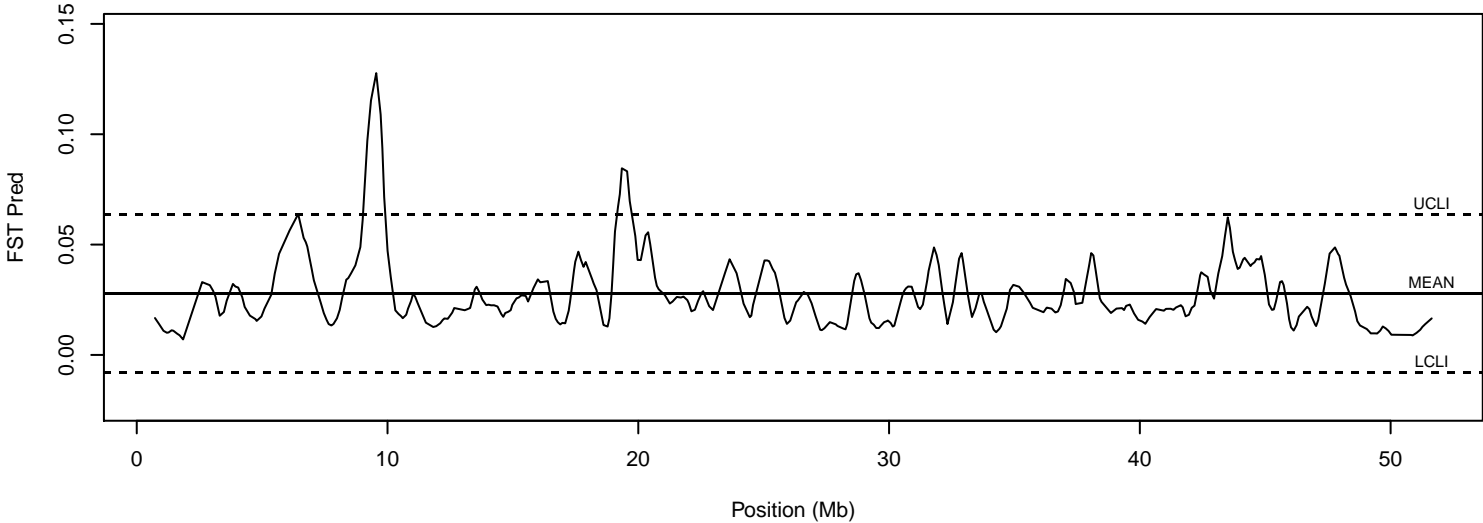

**FST BTA 27**

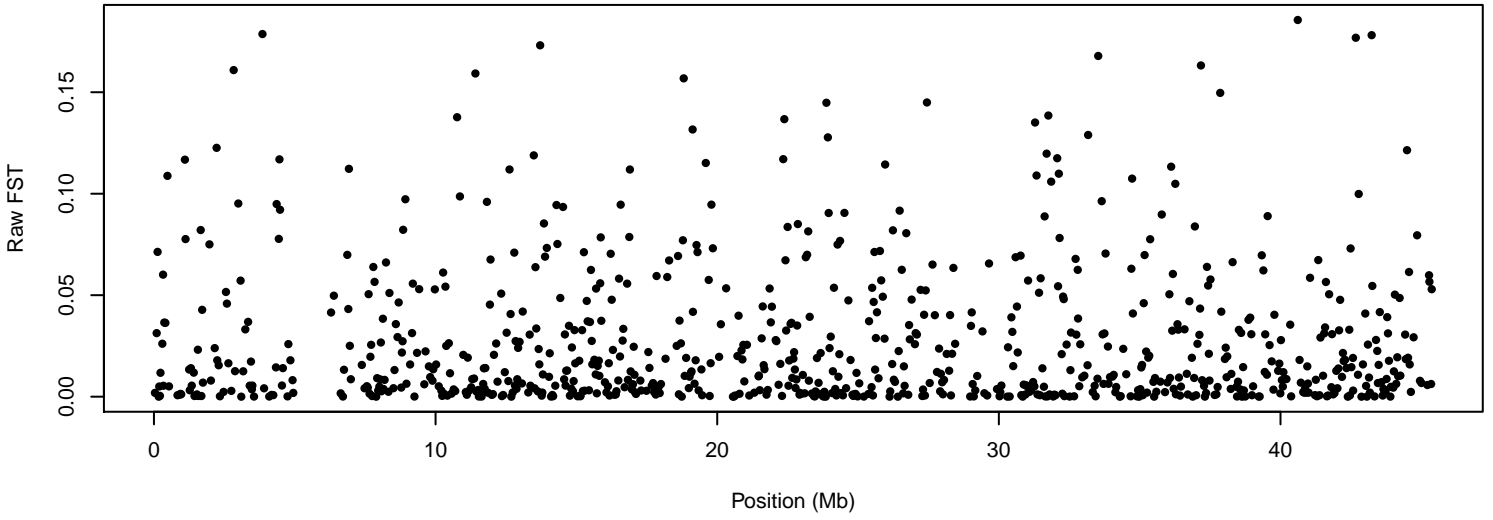

**LOWESS BTA 27**

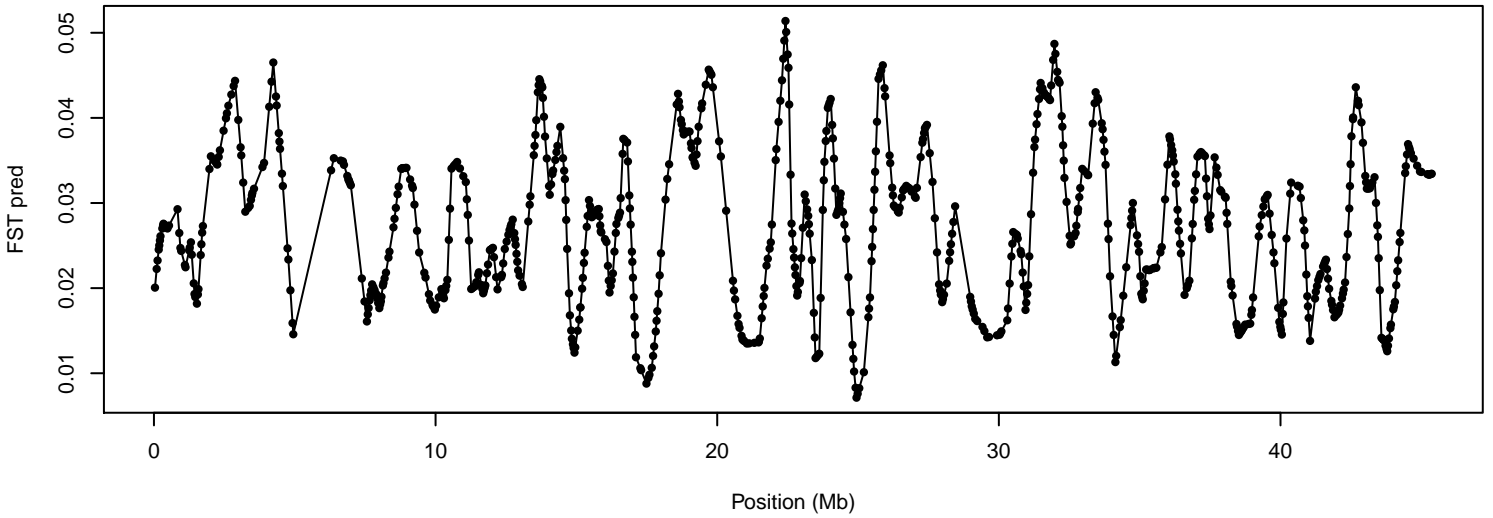

**Control Chart BTA 27**

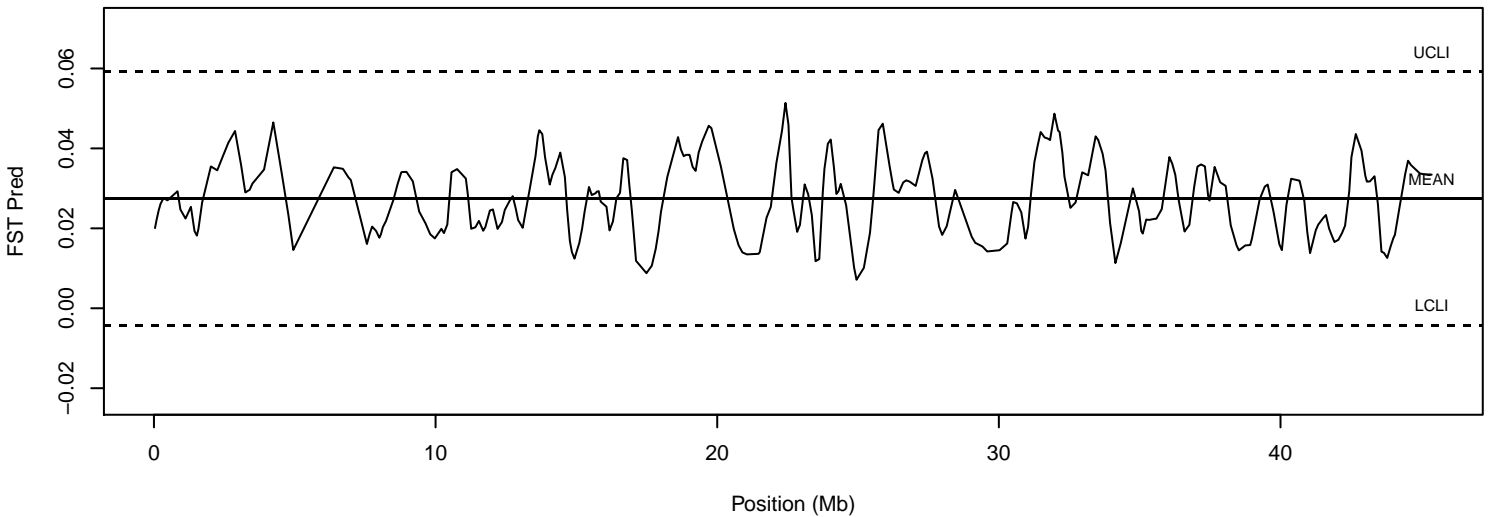

**FST BTA 28**

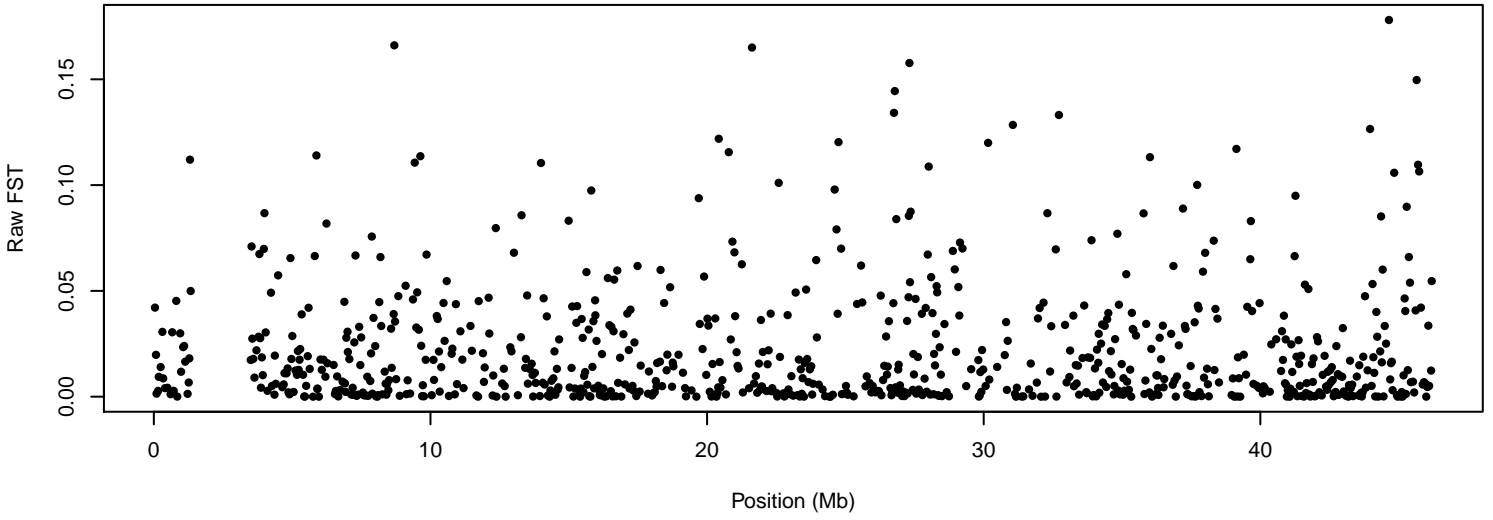

**LOWESS BTA 28**

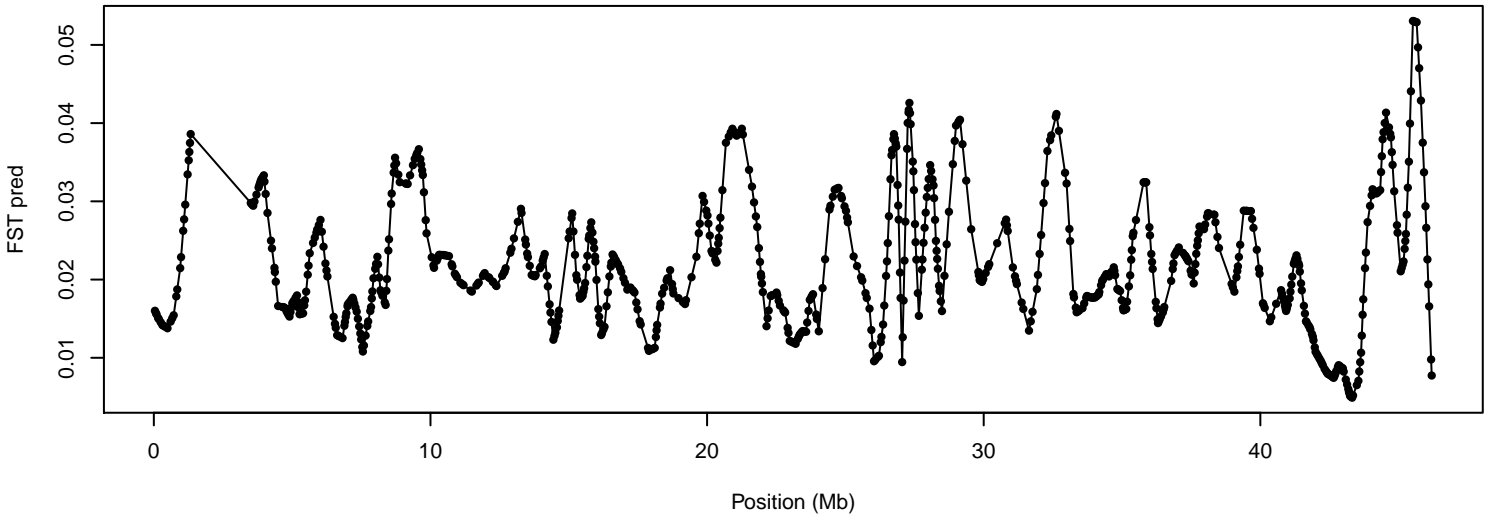

**Control Chart BTA 28**

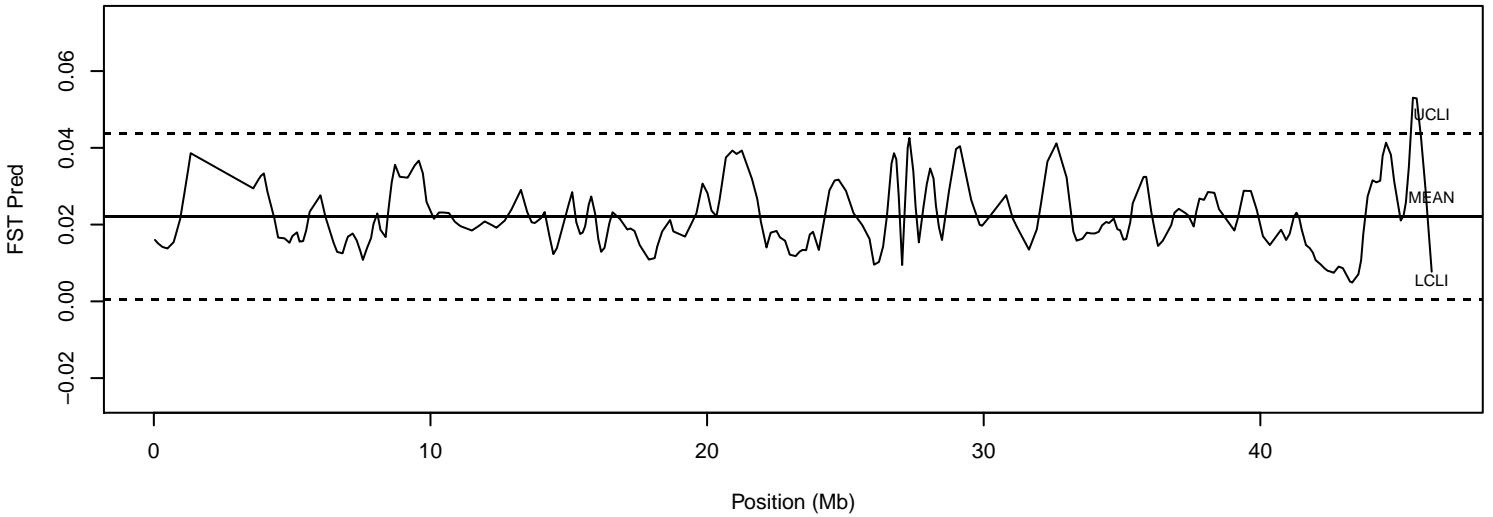

**FST BTA 29**

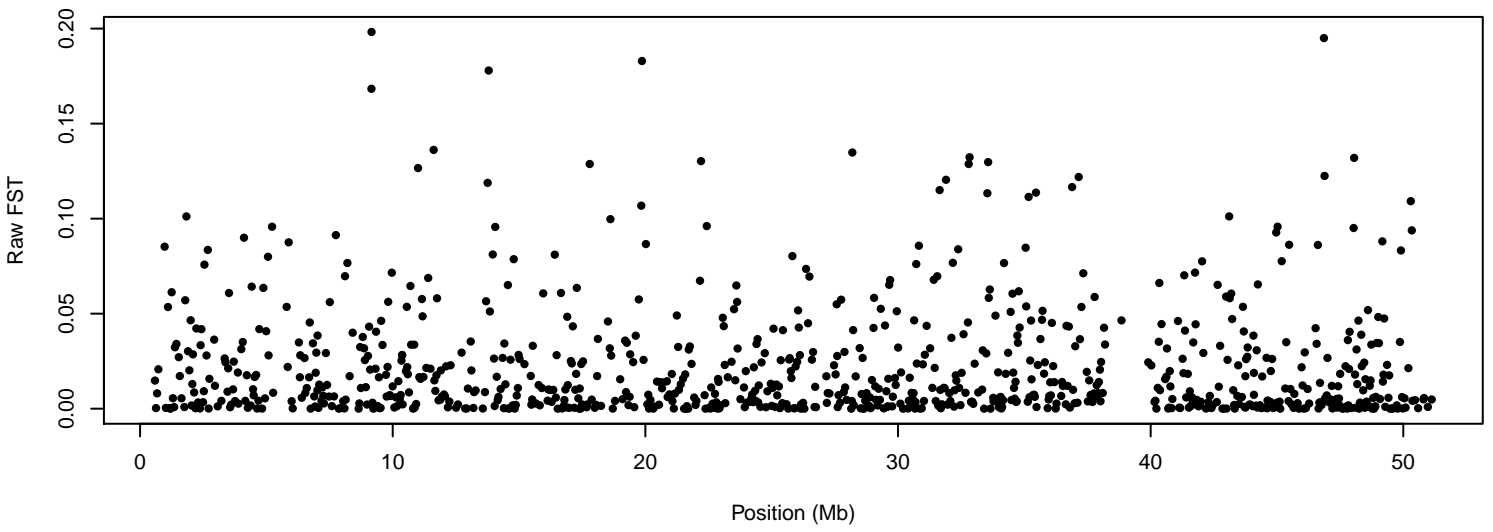

**LOWESS BTA 29**

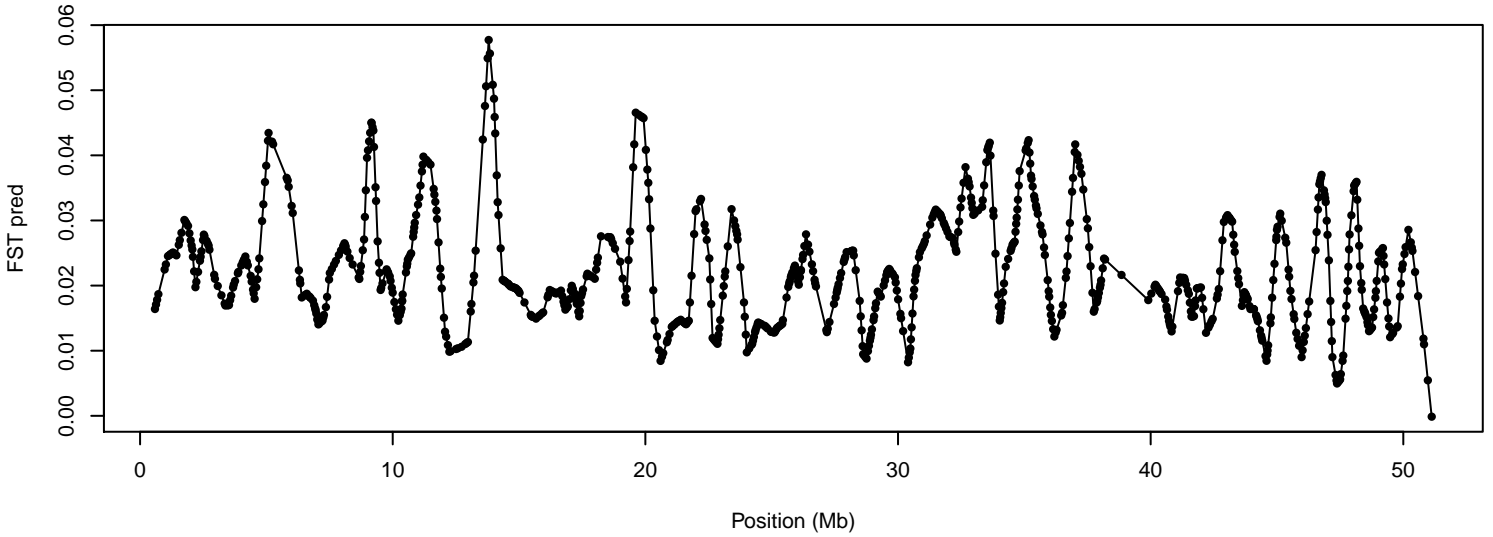

**Control Chart BTA 29**

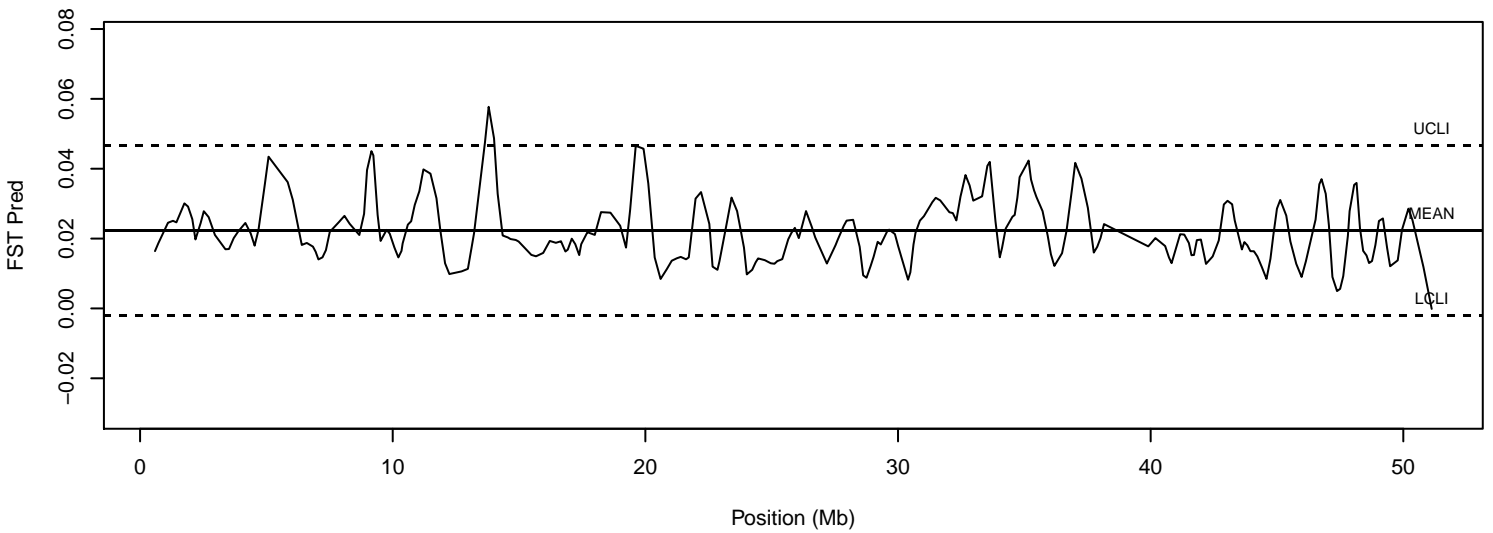

Supplement: 12711_2015_128_MOESM2_ESM.pdf [file 12711_2015_128_MOESM2_ESM.pdf]
