# Supplementary material for: Detection of selection signatures in Piemontese and Marchigiana cattle, two breeds with similar production aptitudes but different selection histories
Source: PubMed Central journal article supplement (PMC4476081; doi:10.1186/s12711-015-0128-2), 2015-06-23

FST VS varLD BTA 1

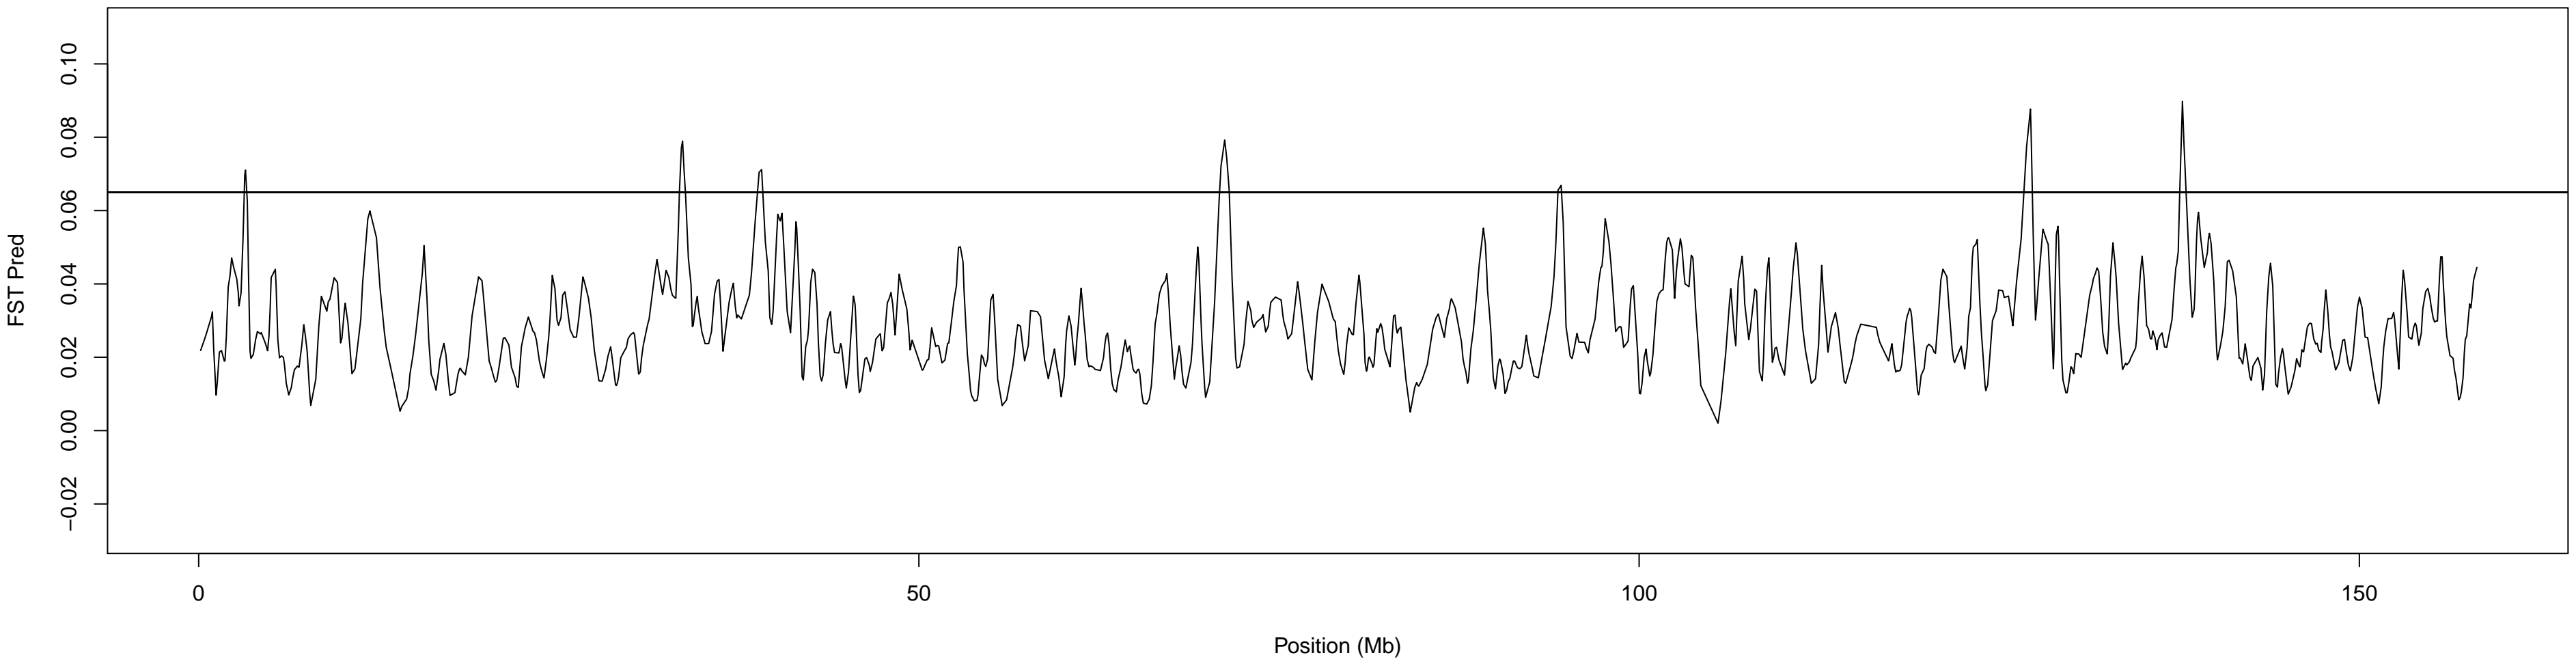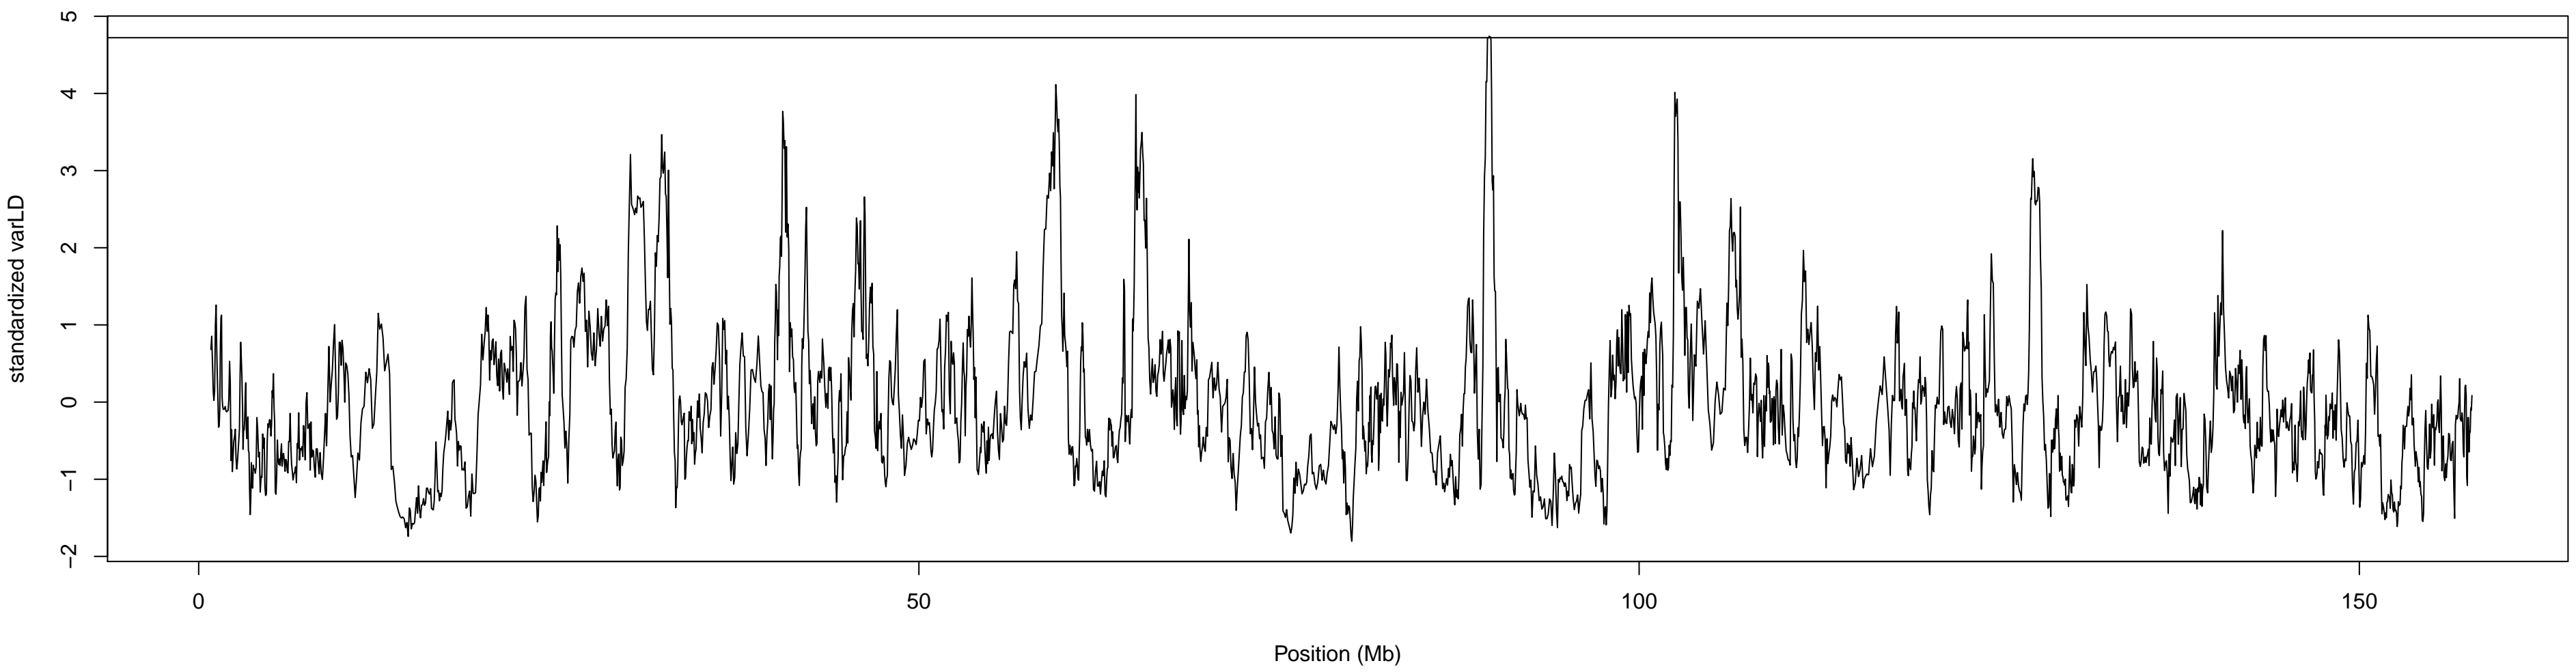

# FST VS varLD BTA 2

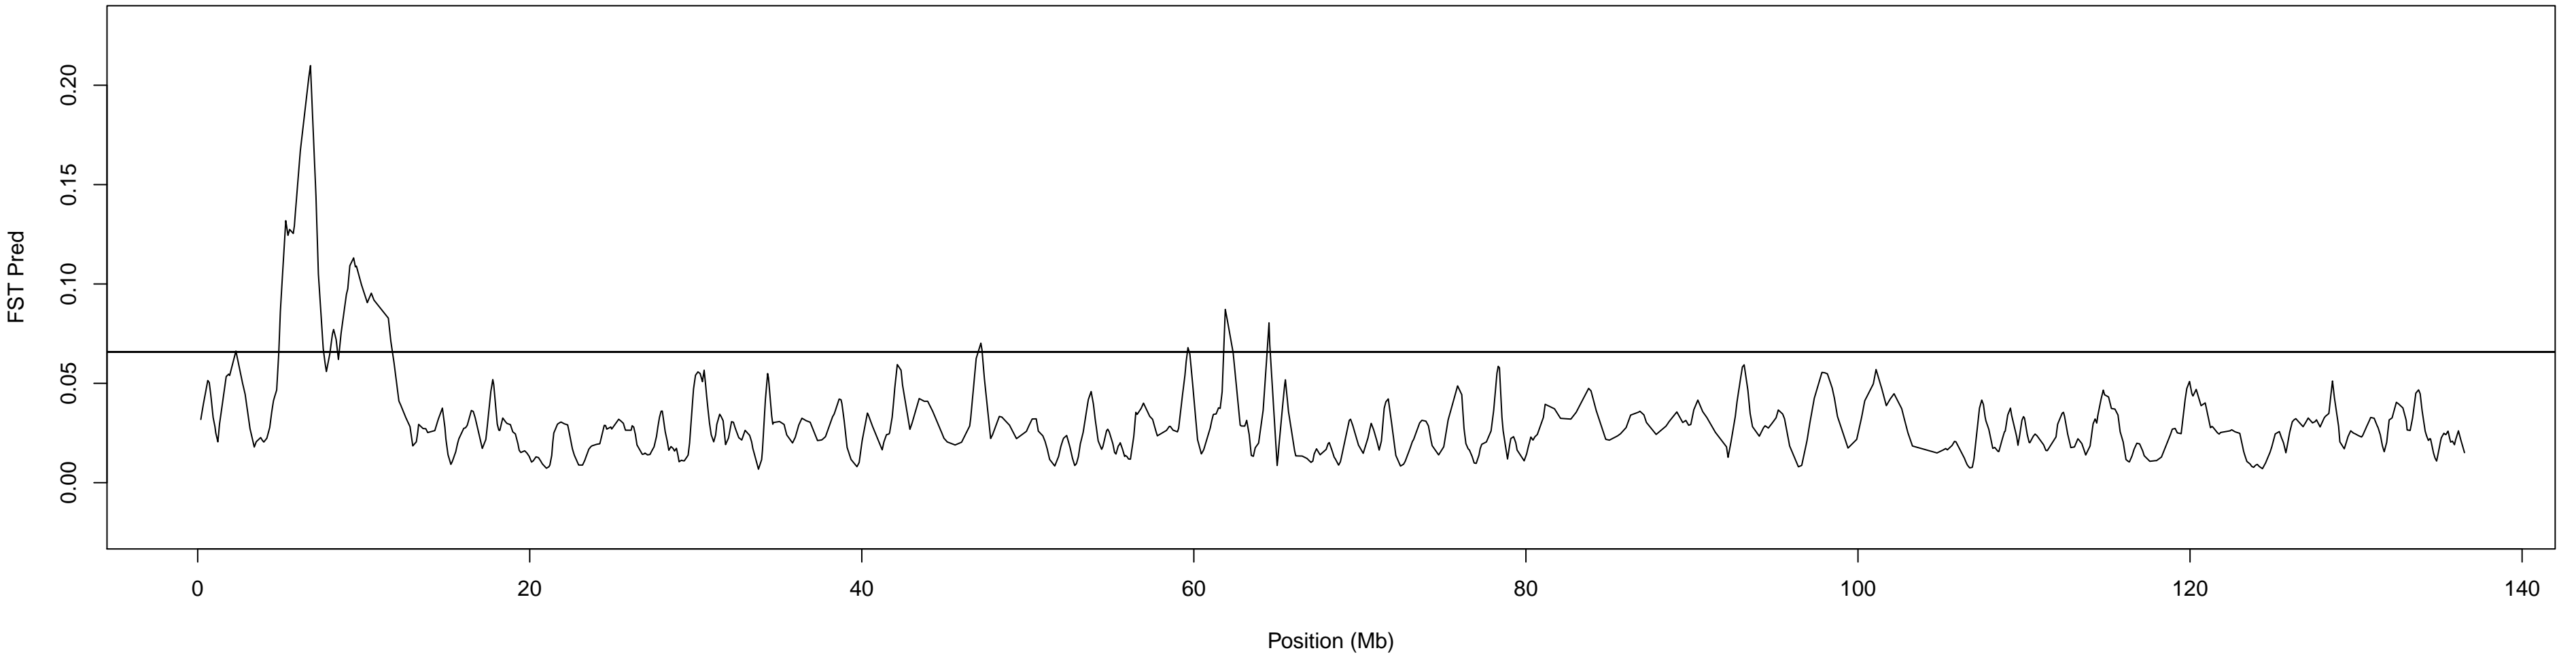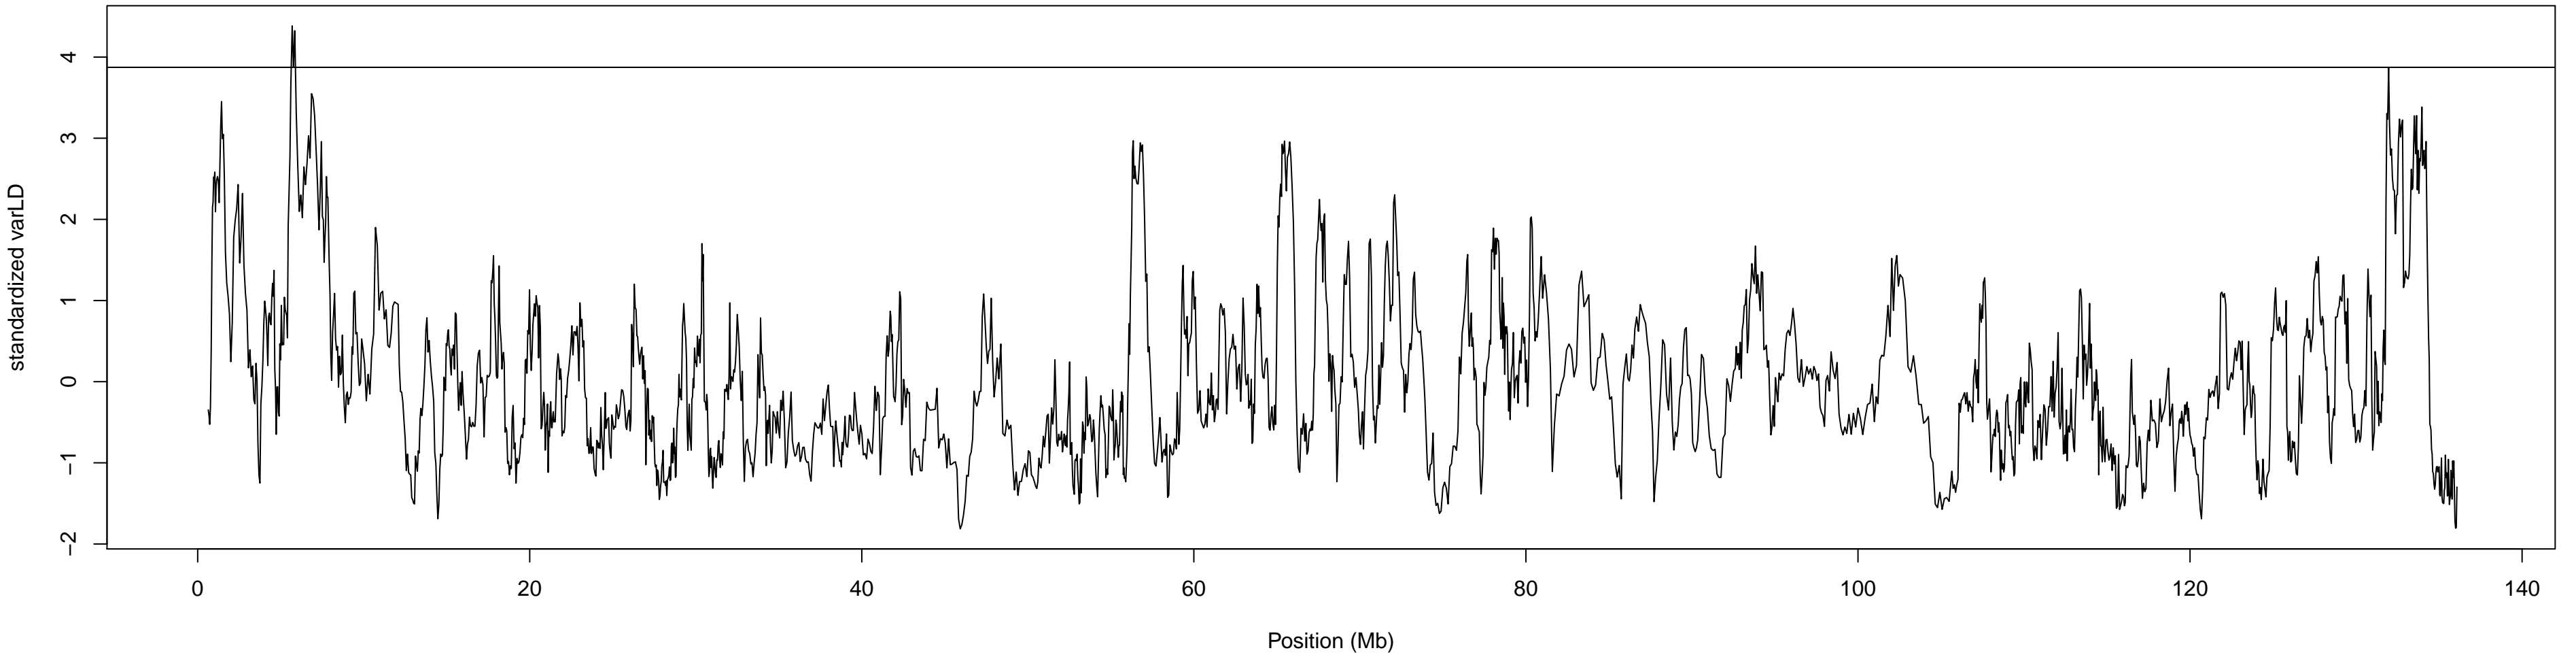

### FST VS varLD BTA 3

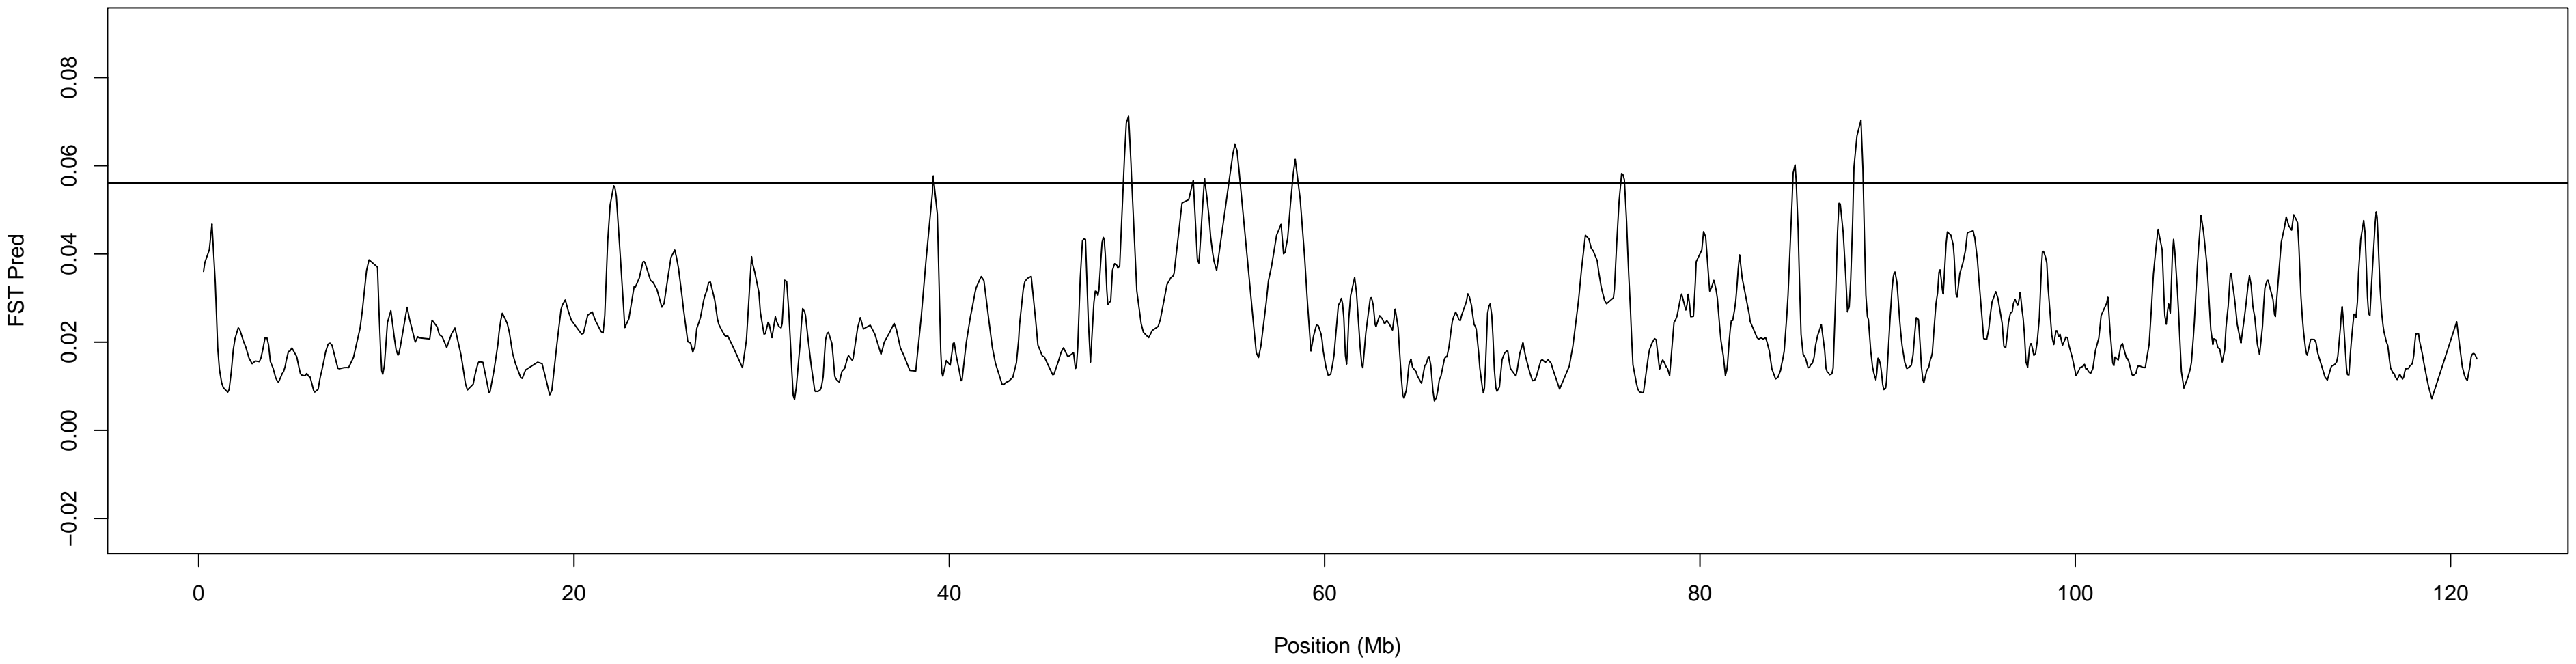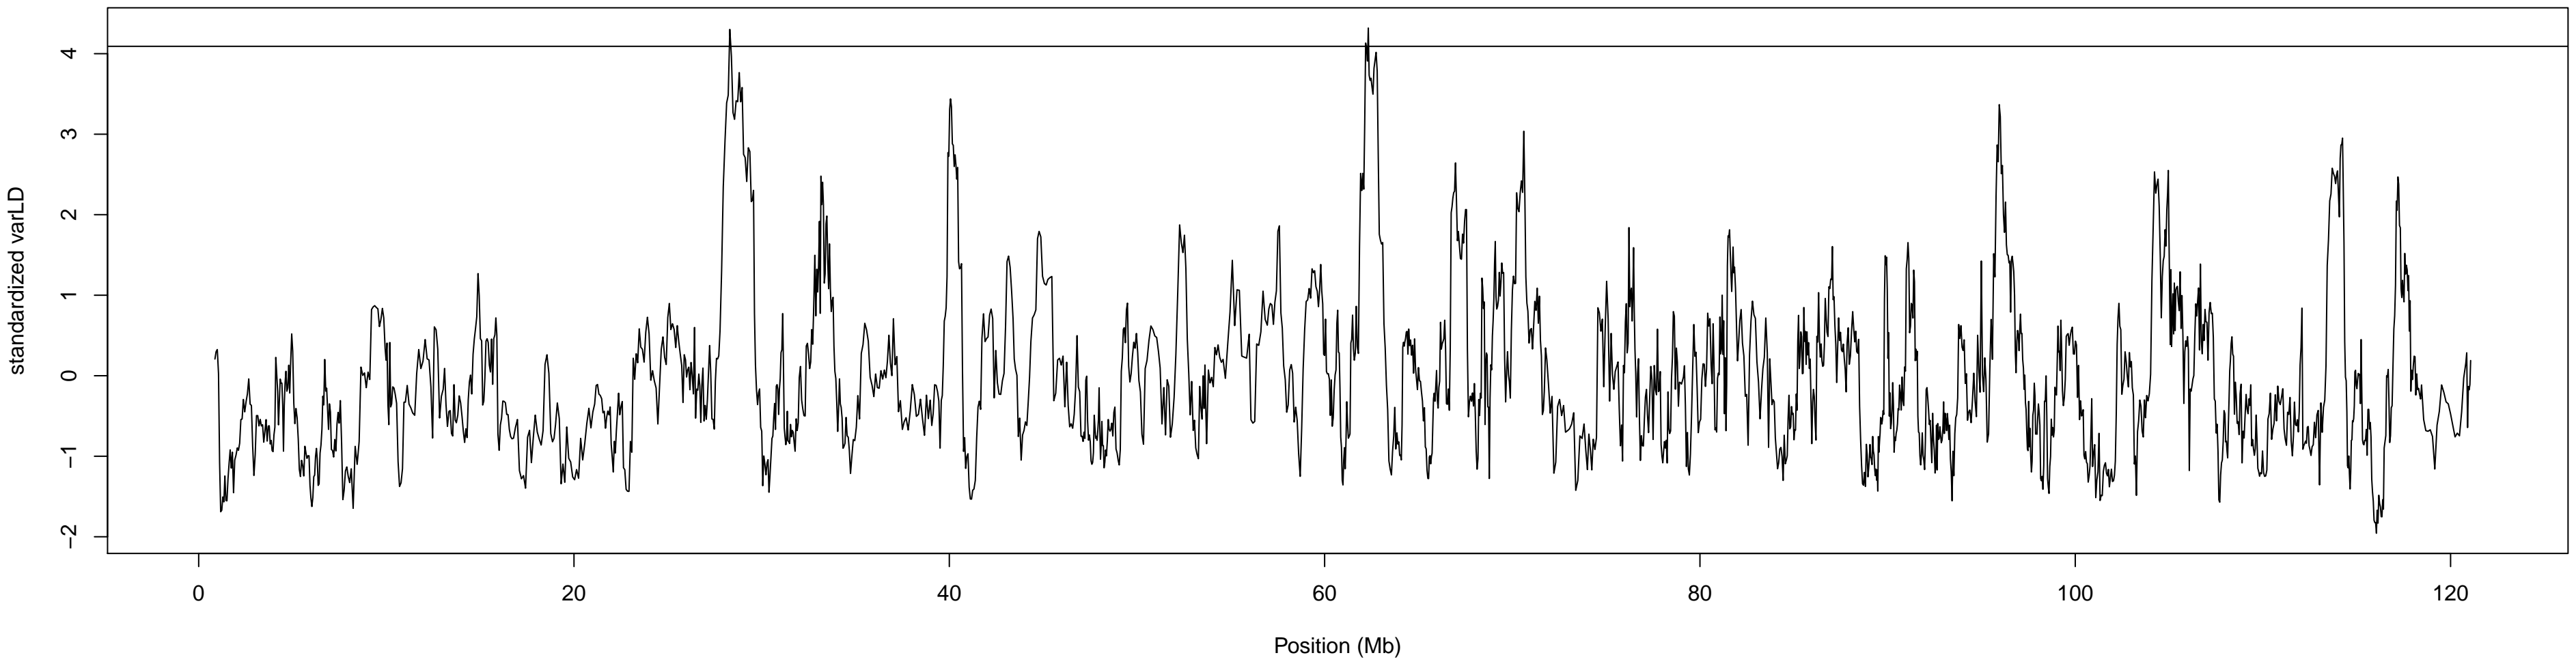

# FST VS varLD BTA 4

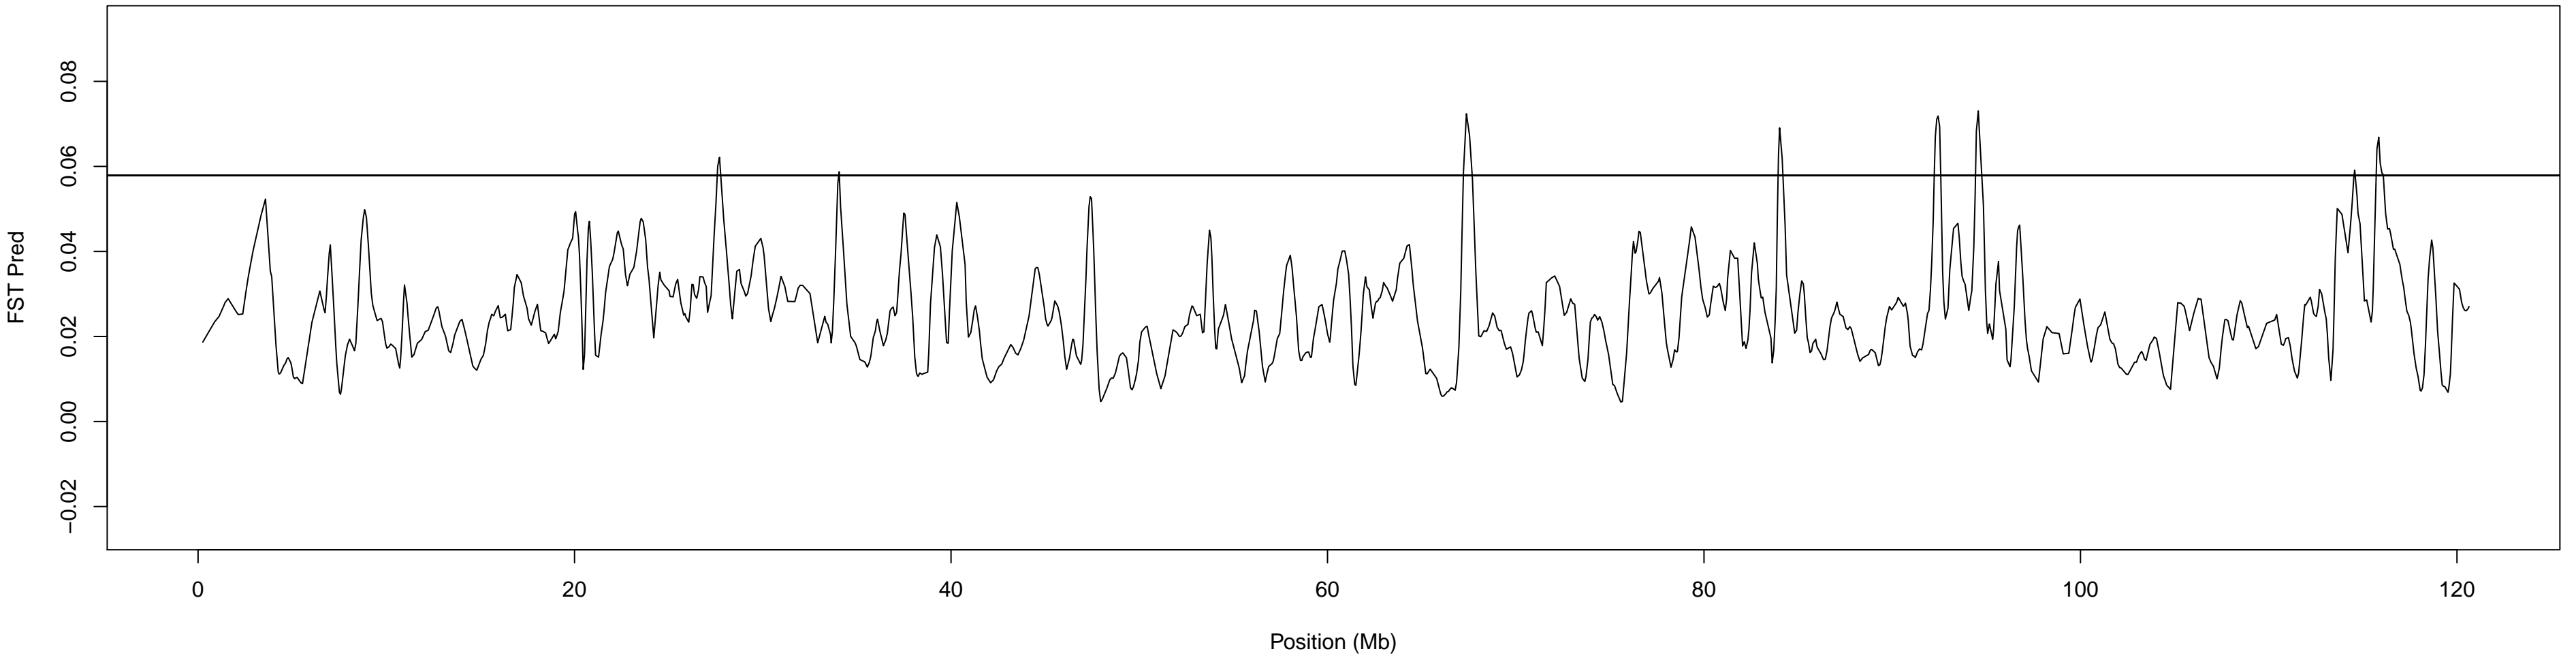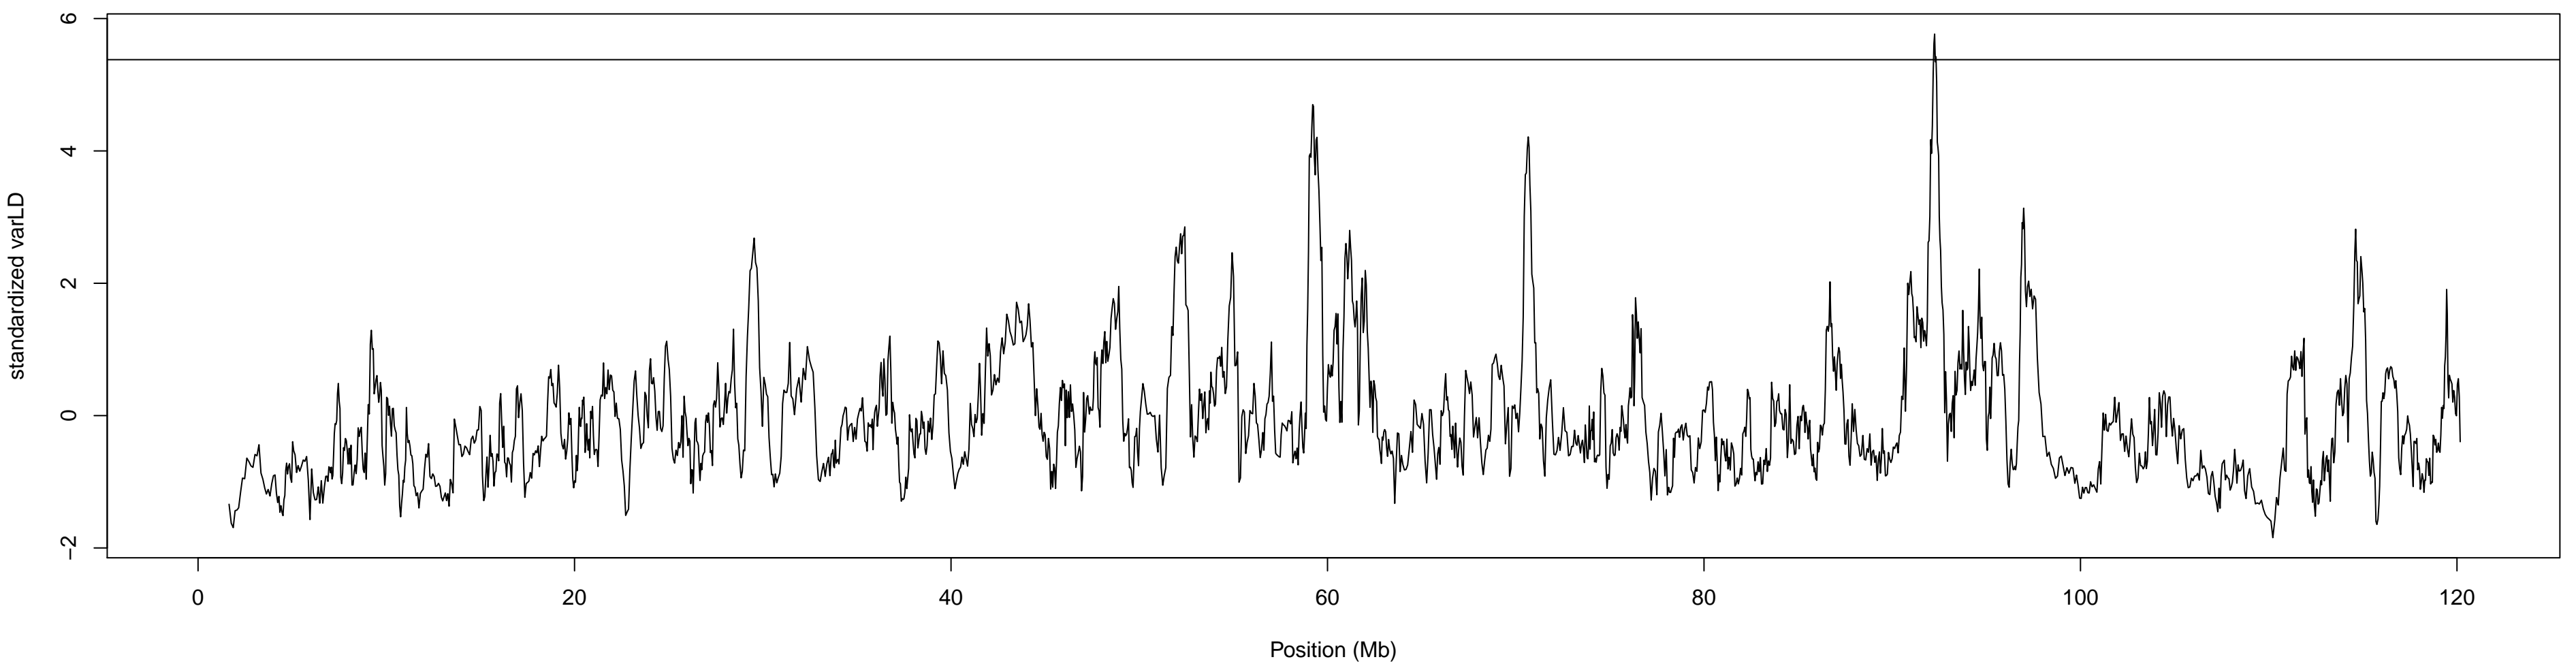

# FST VS varLD BTA 5

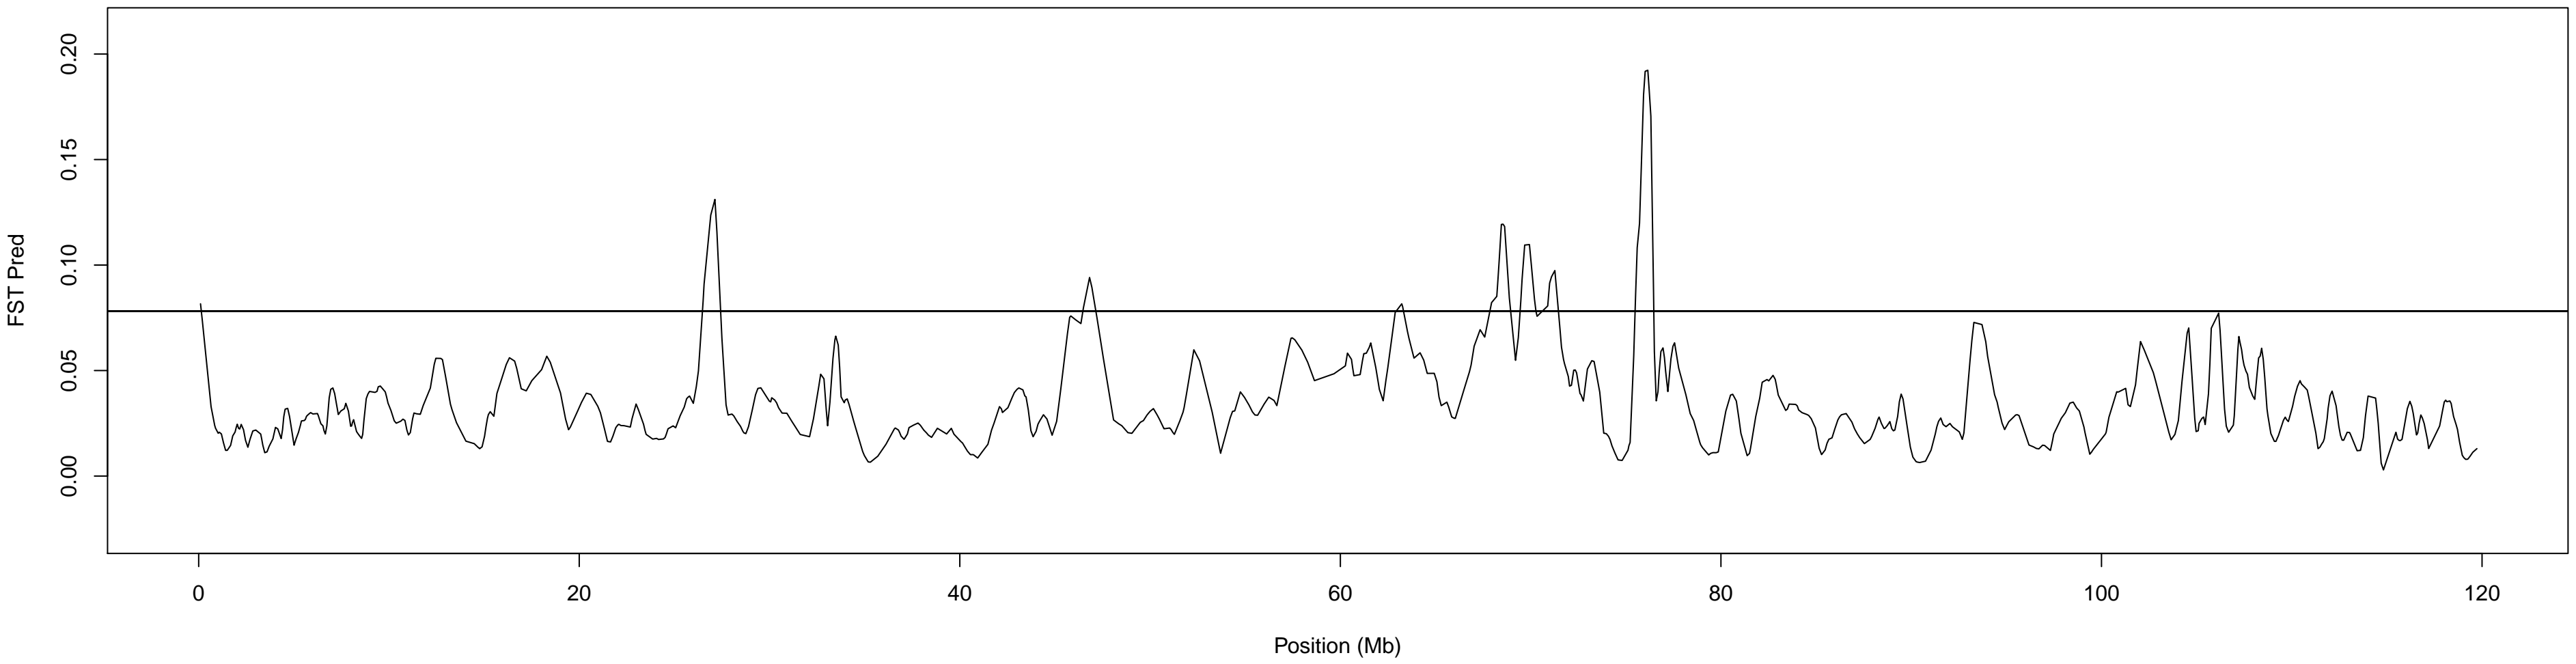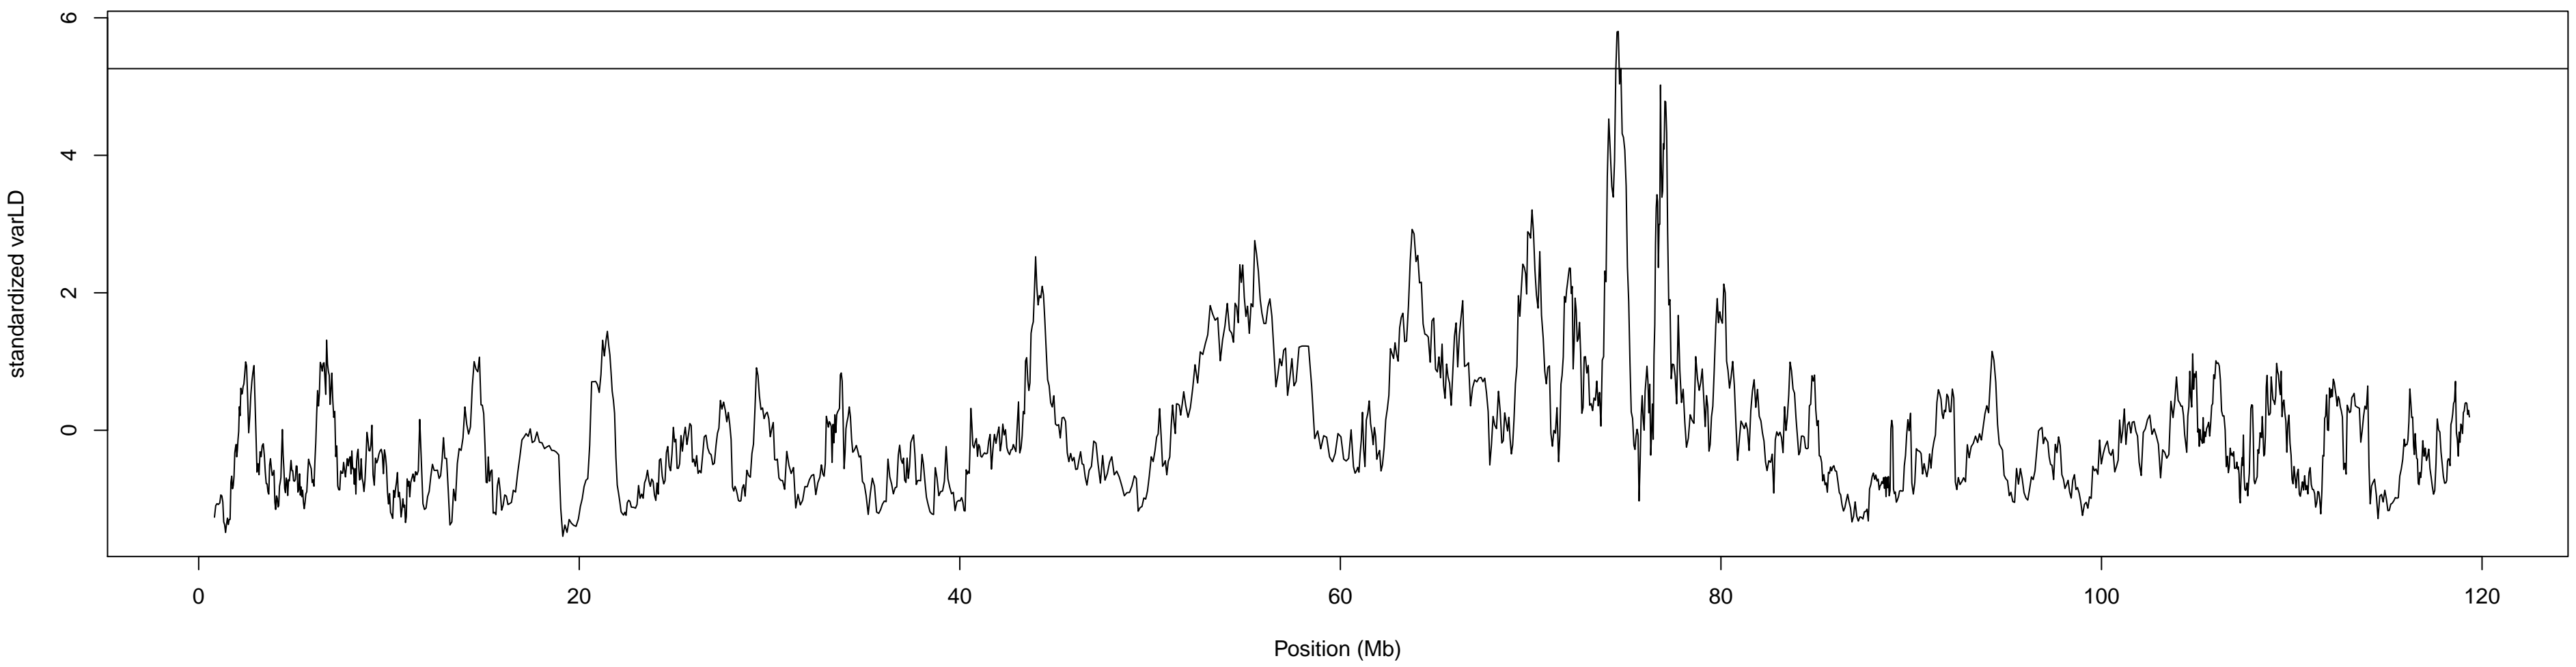

# FST VS varLD BTA 6

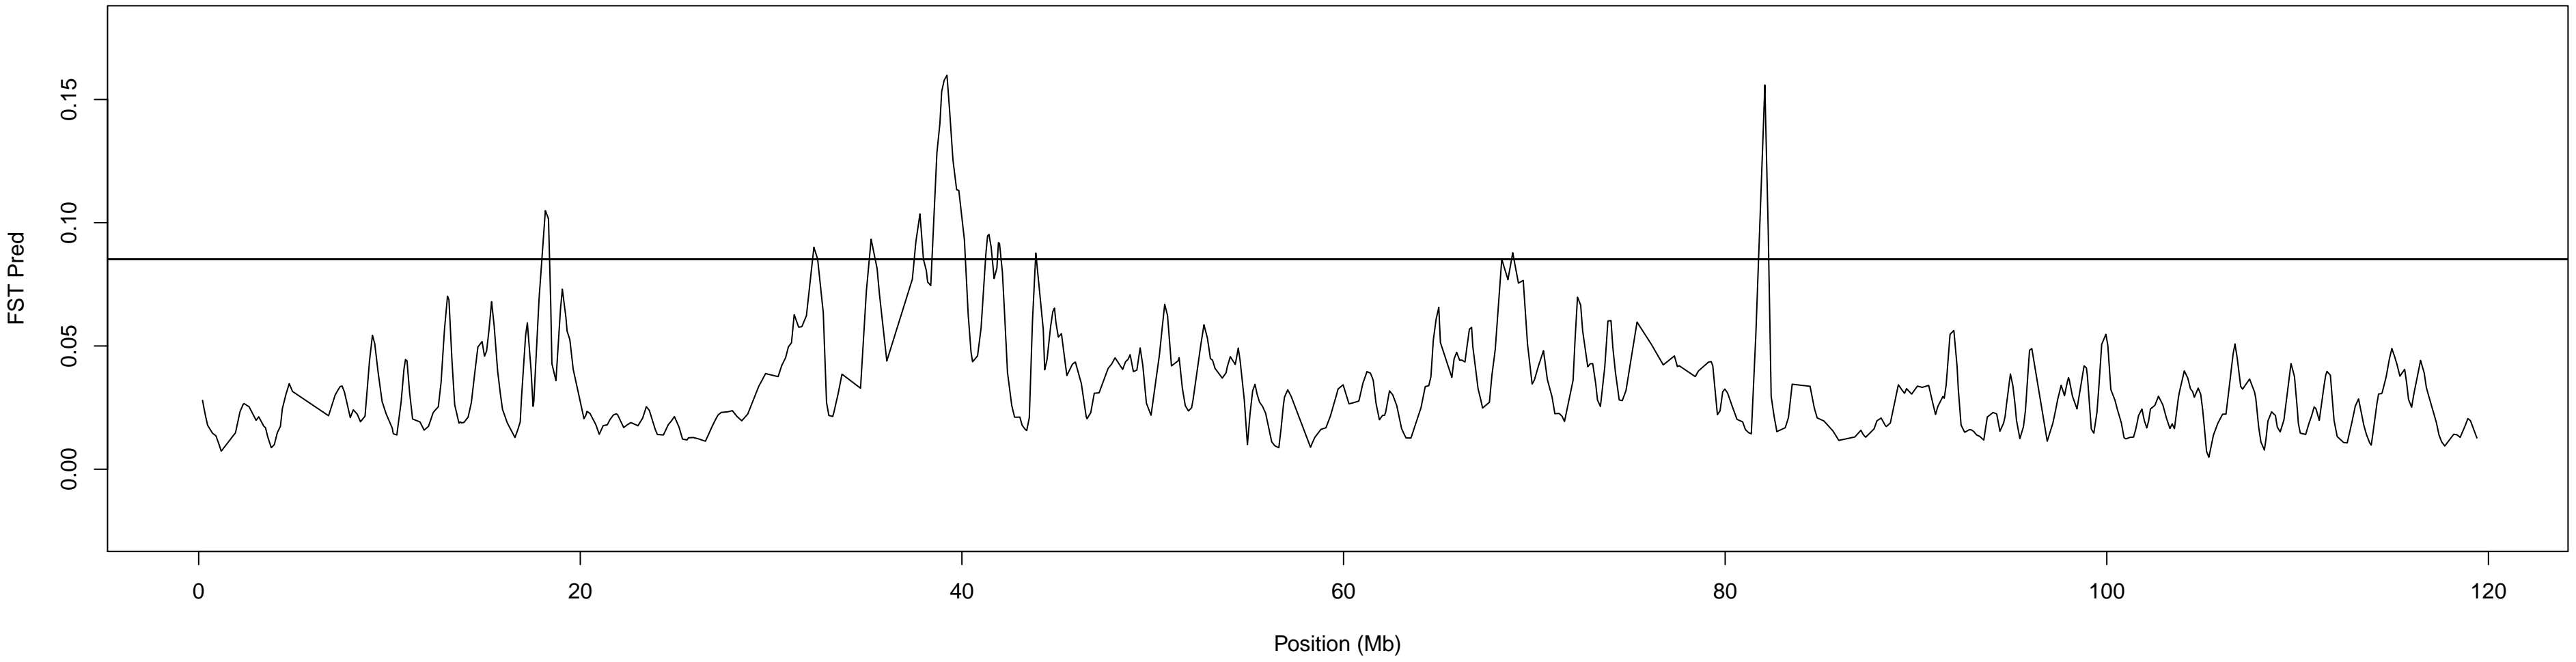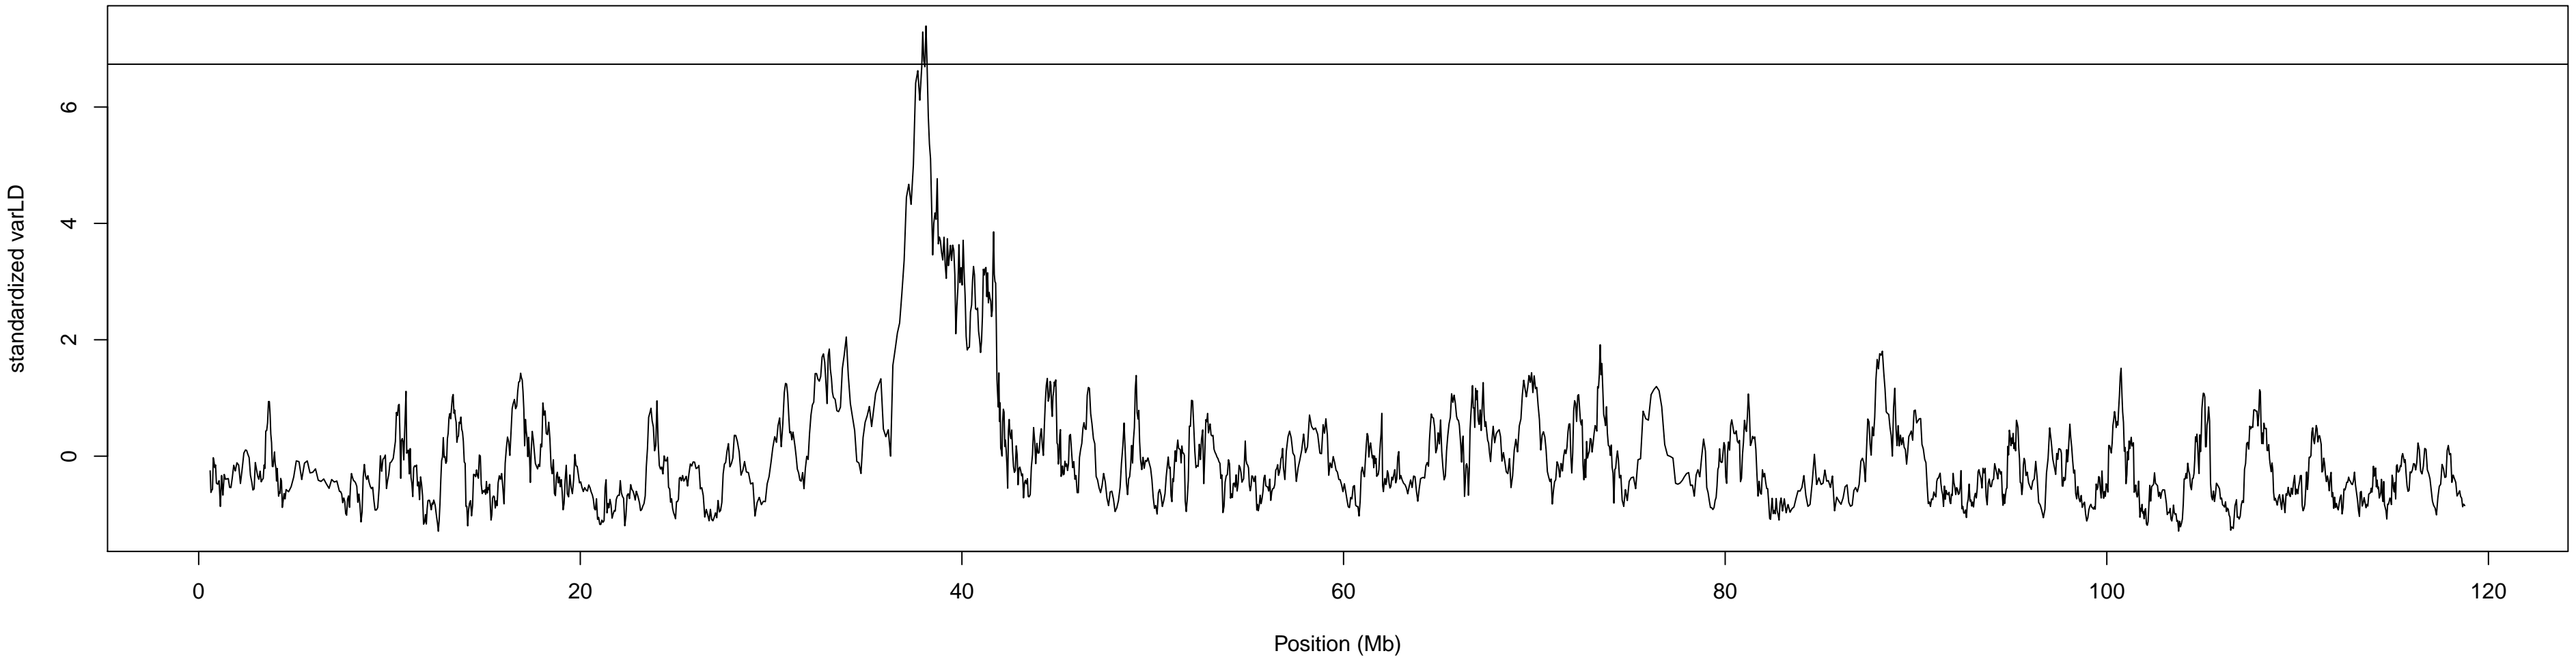

# FST VS varLD BTA 7

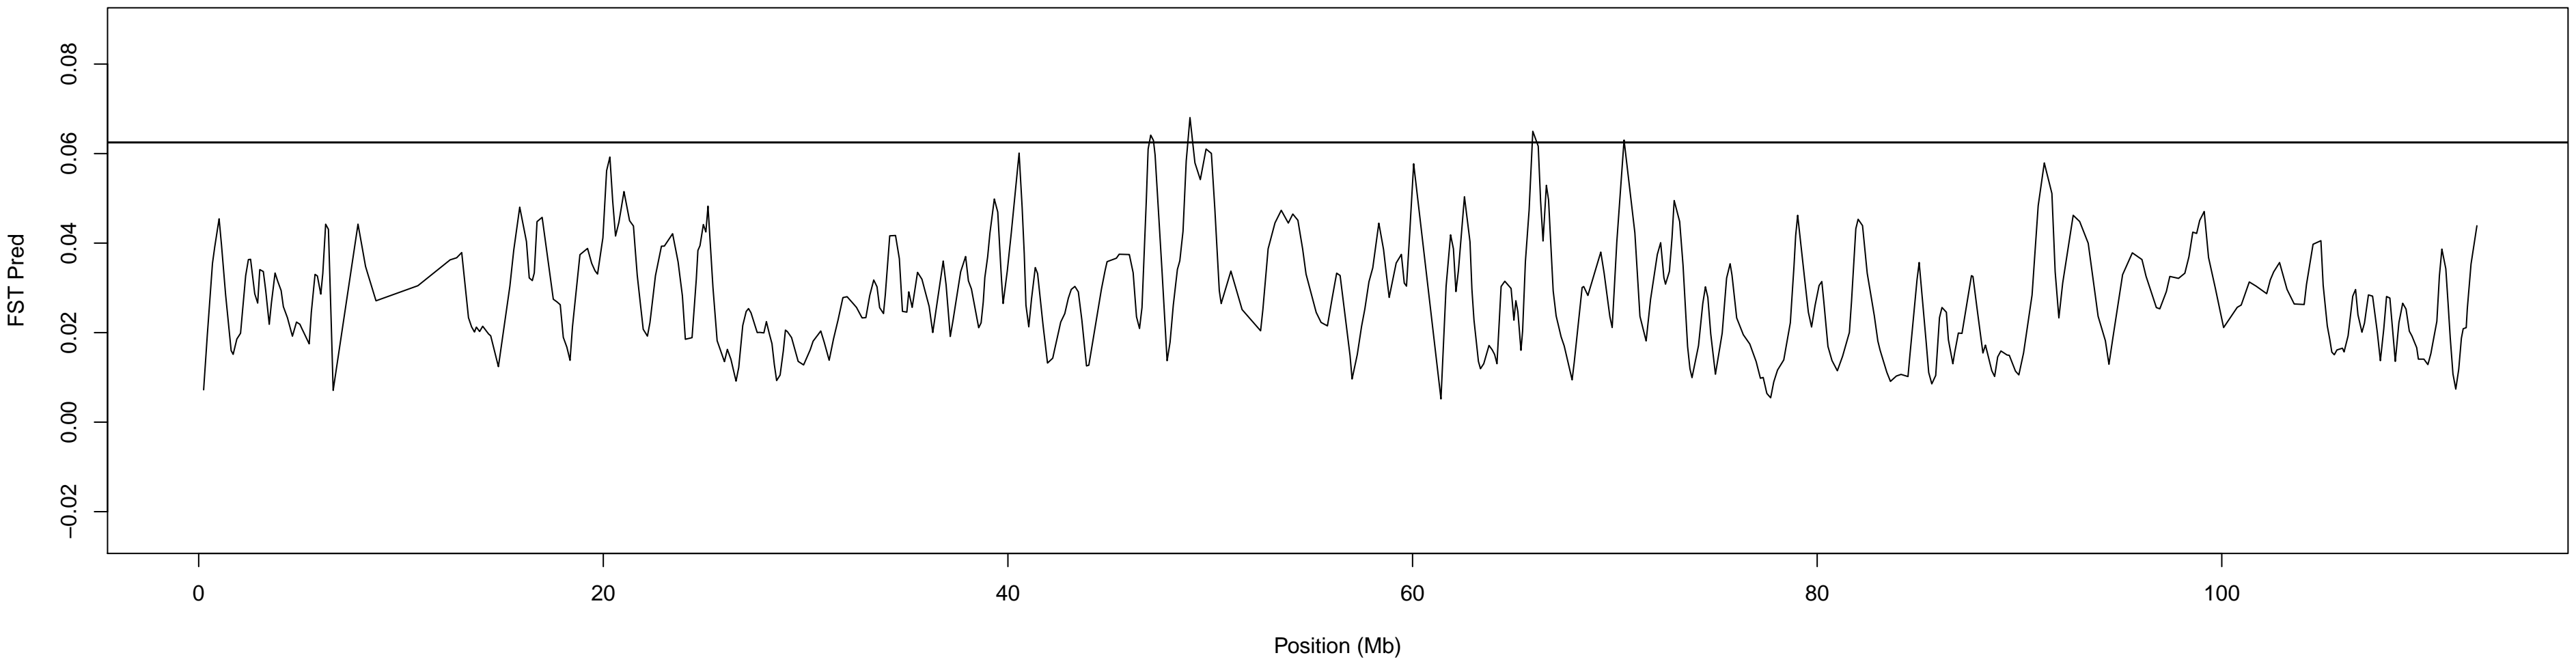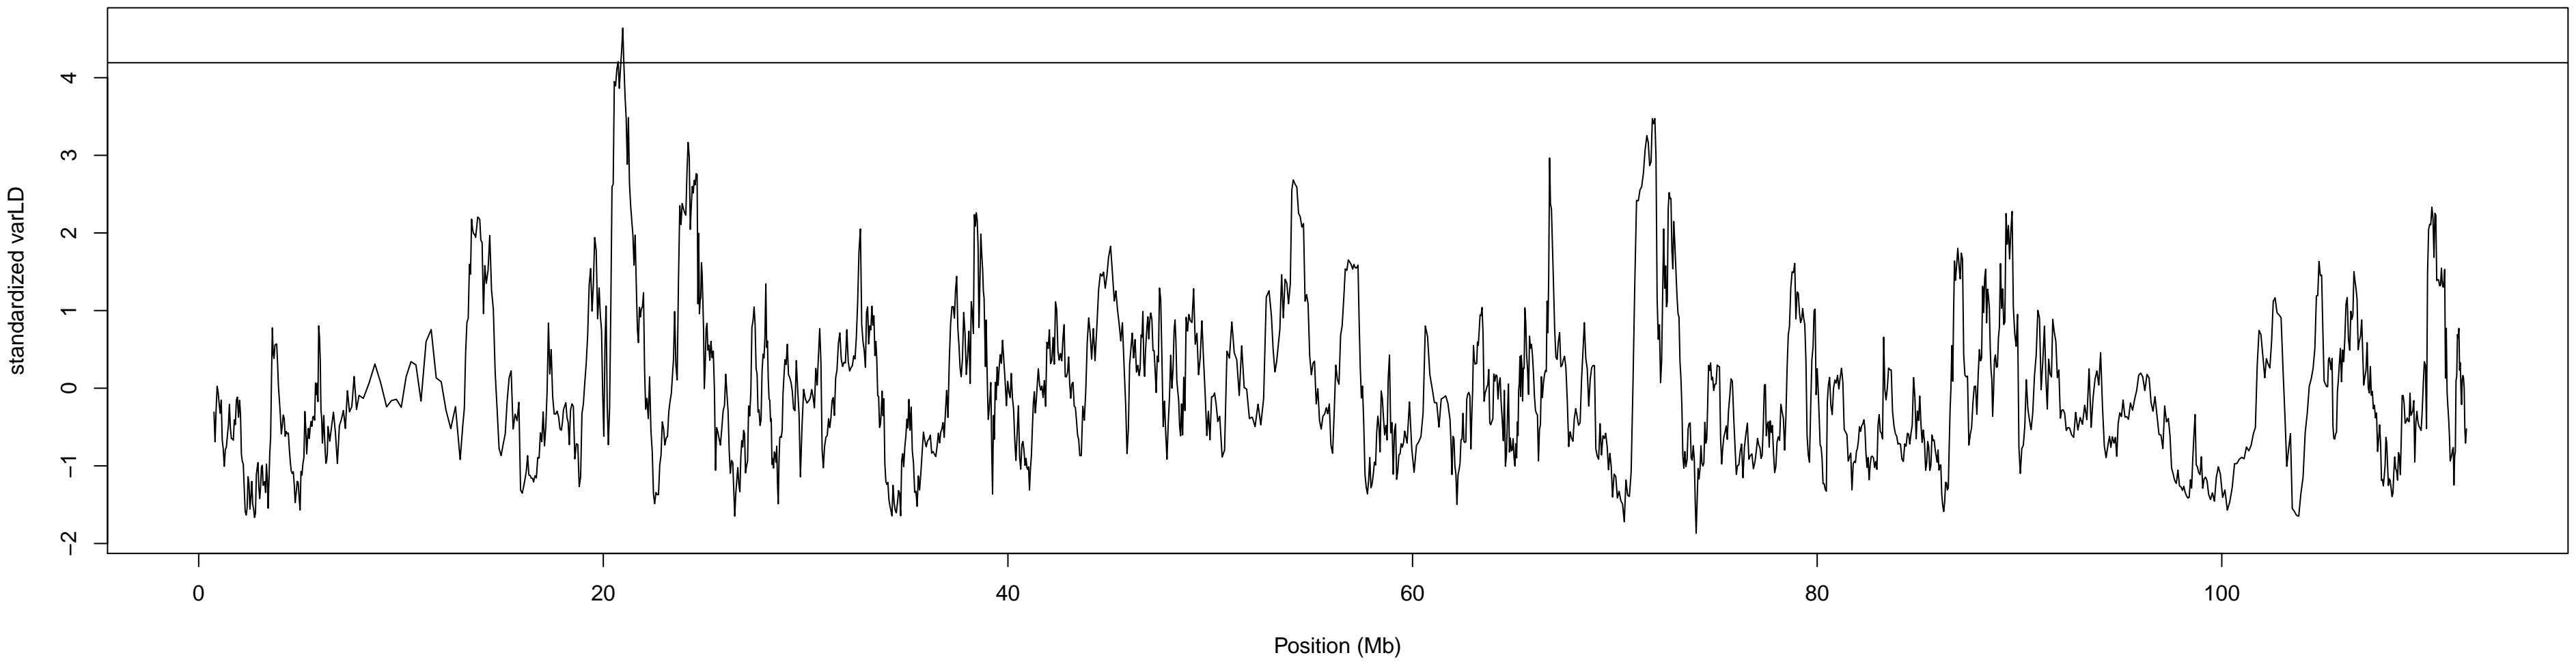

# FST VS varLD BTA 8

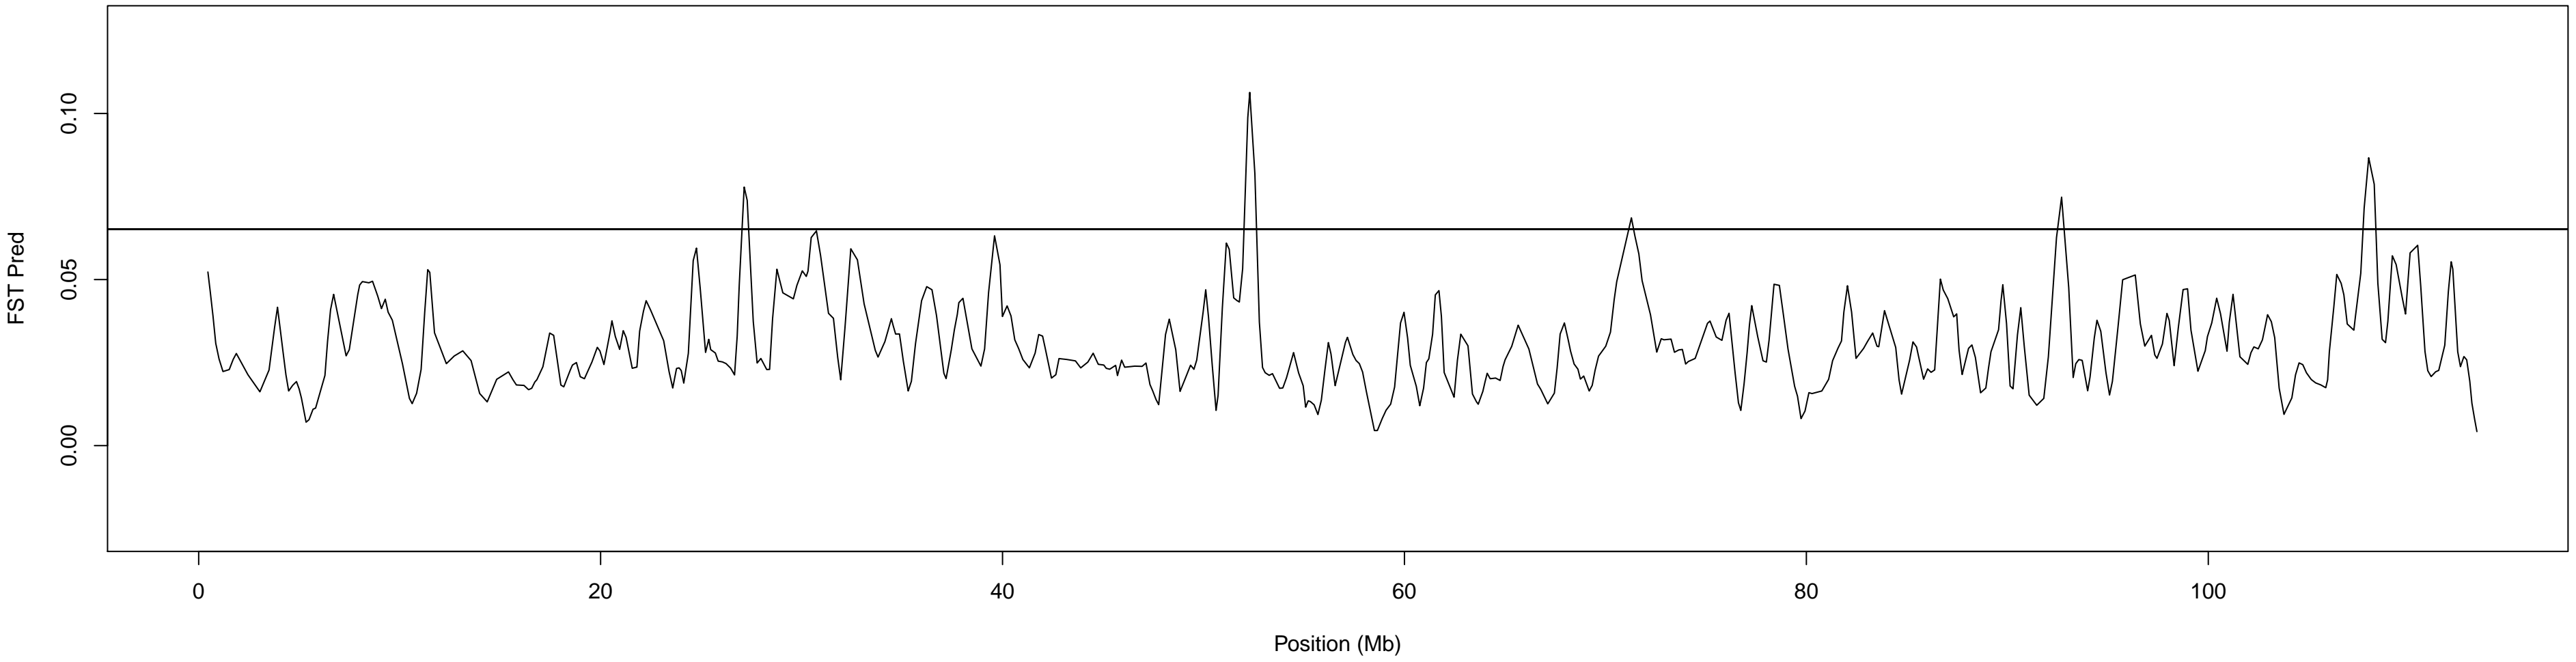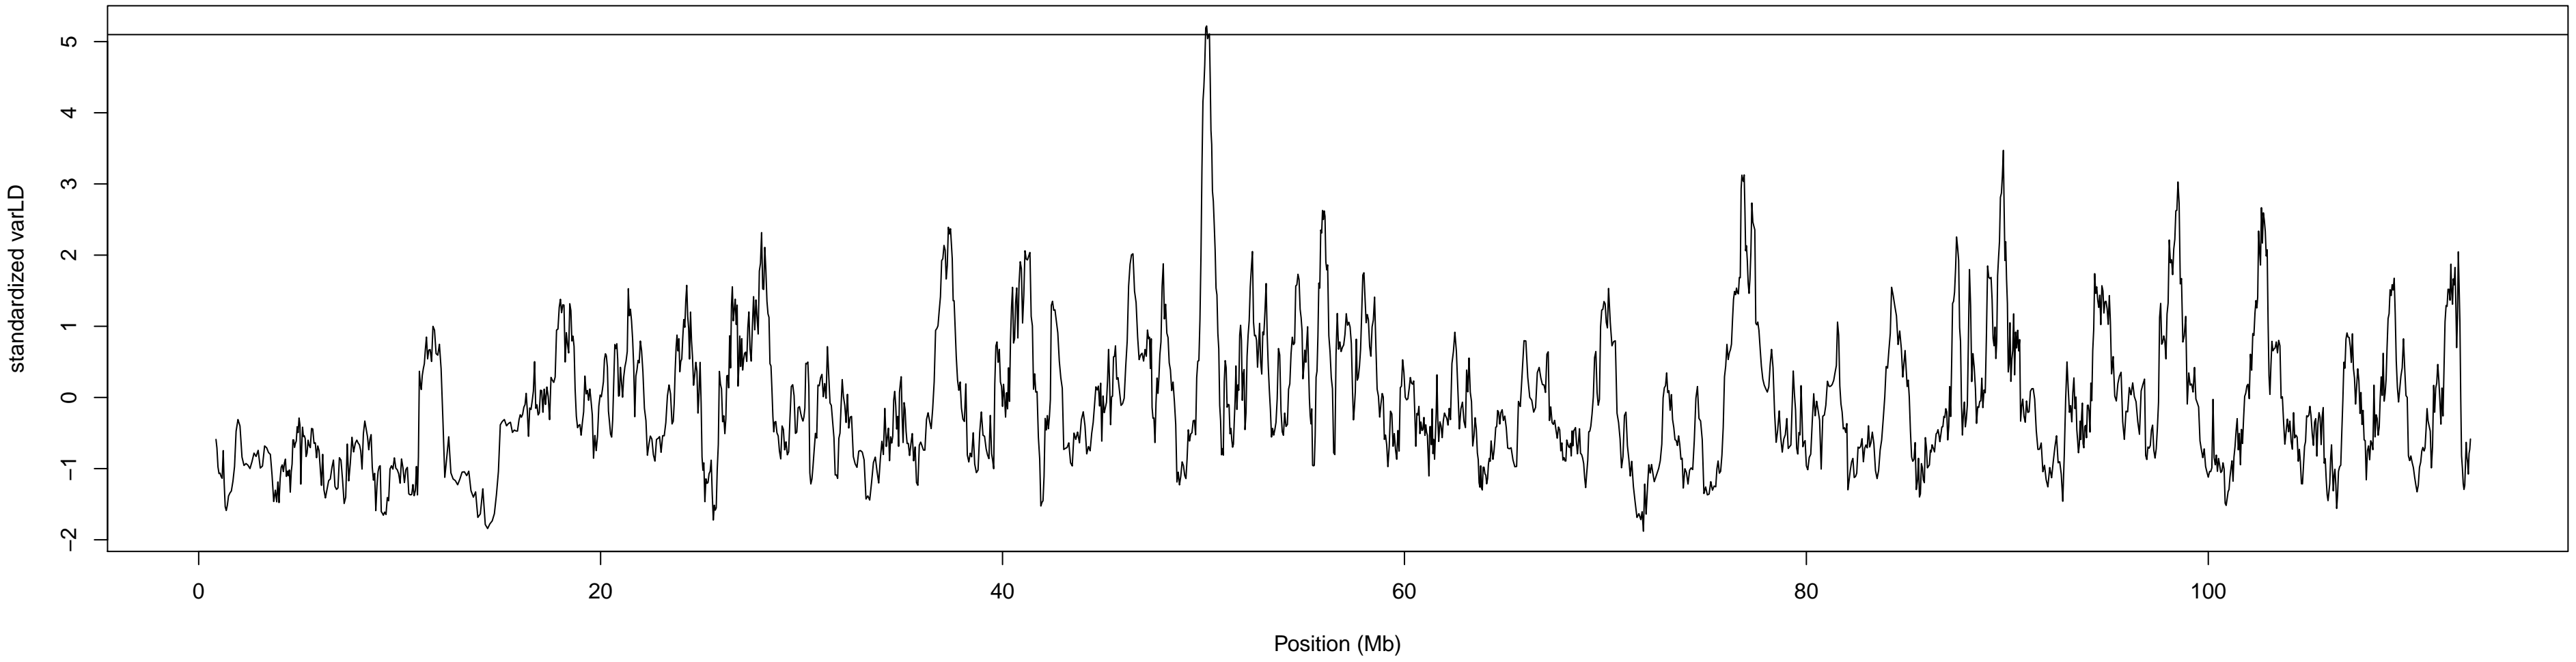



# FST VS varLD BTA 9

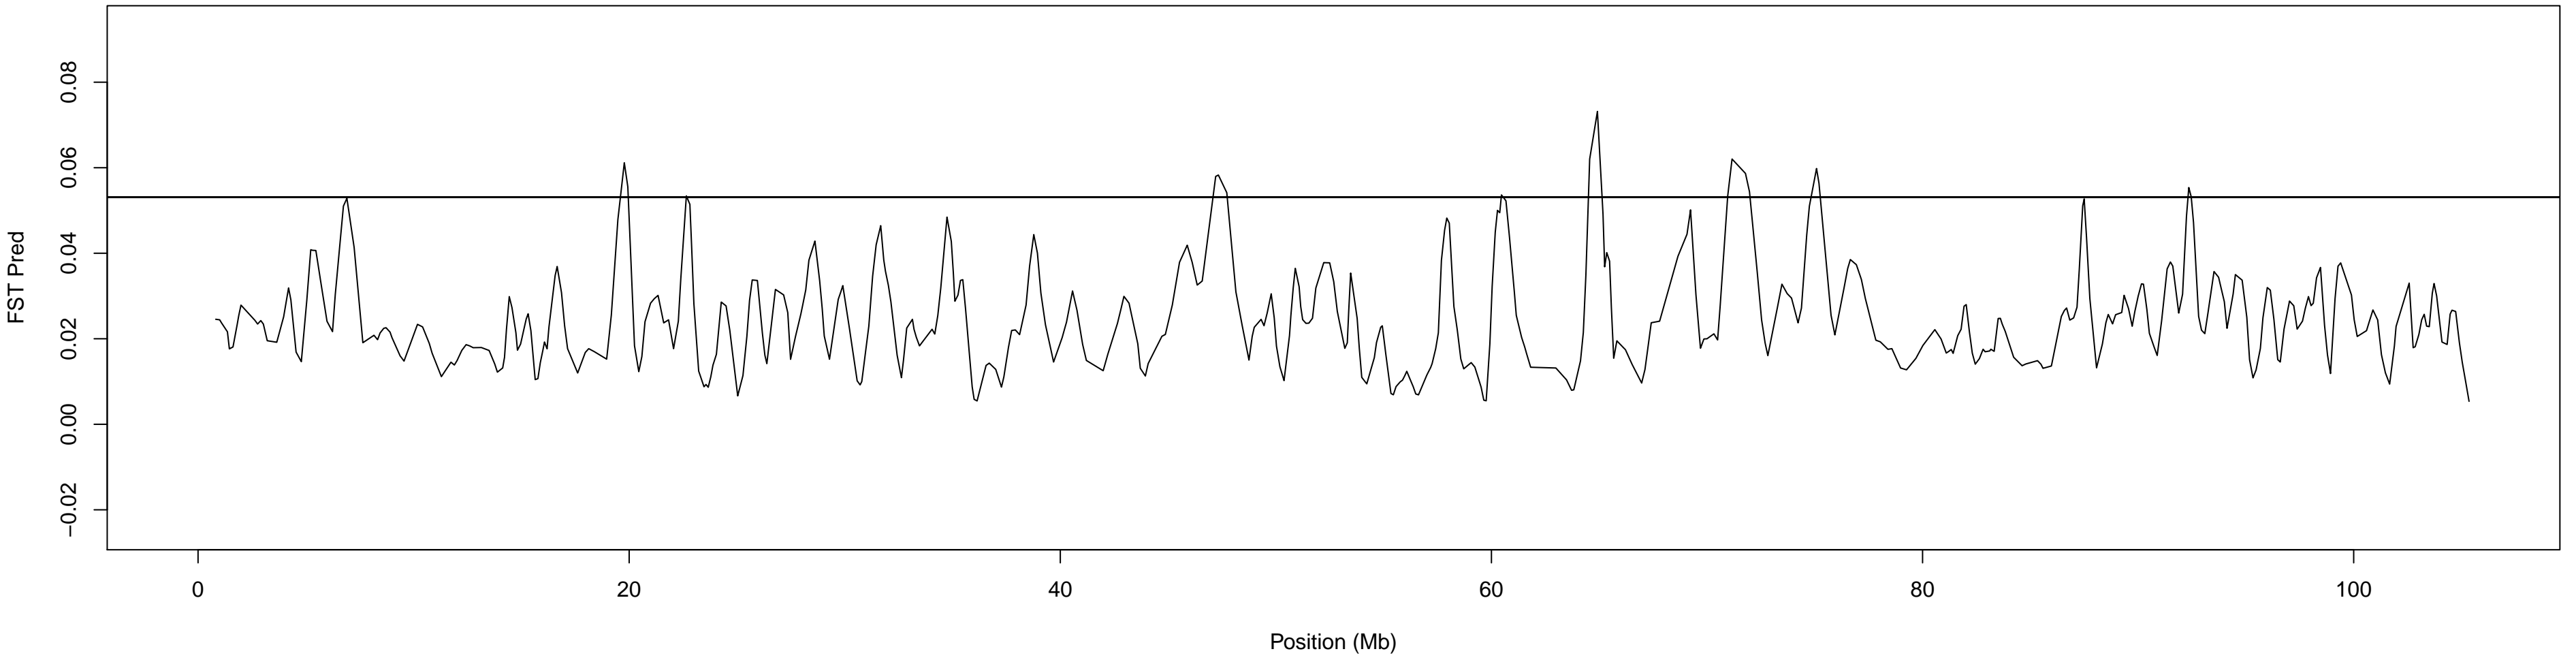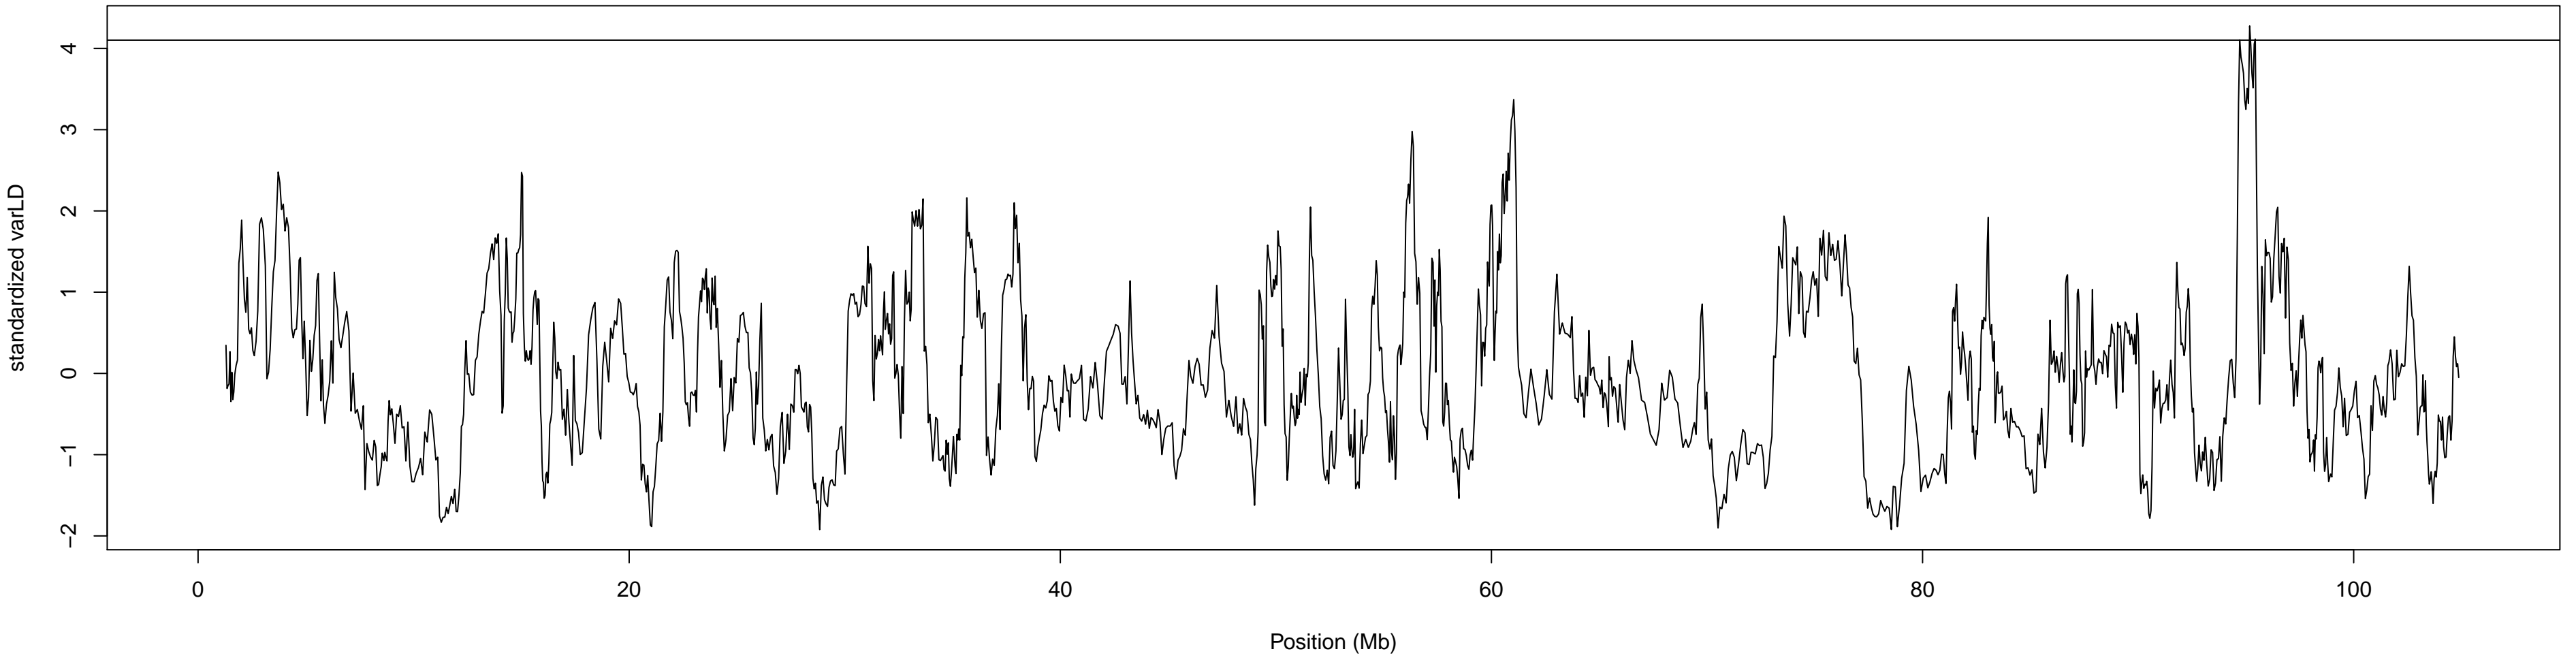

# FST VS varLD BTA 10

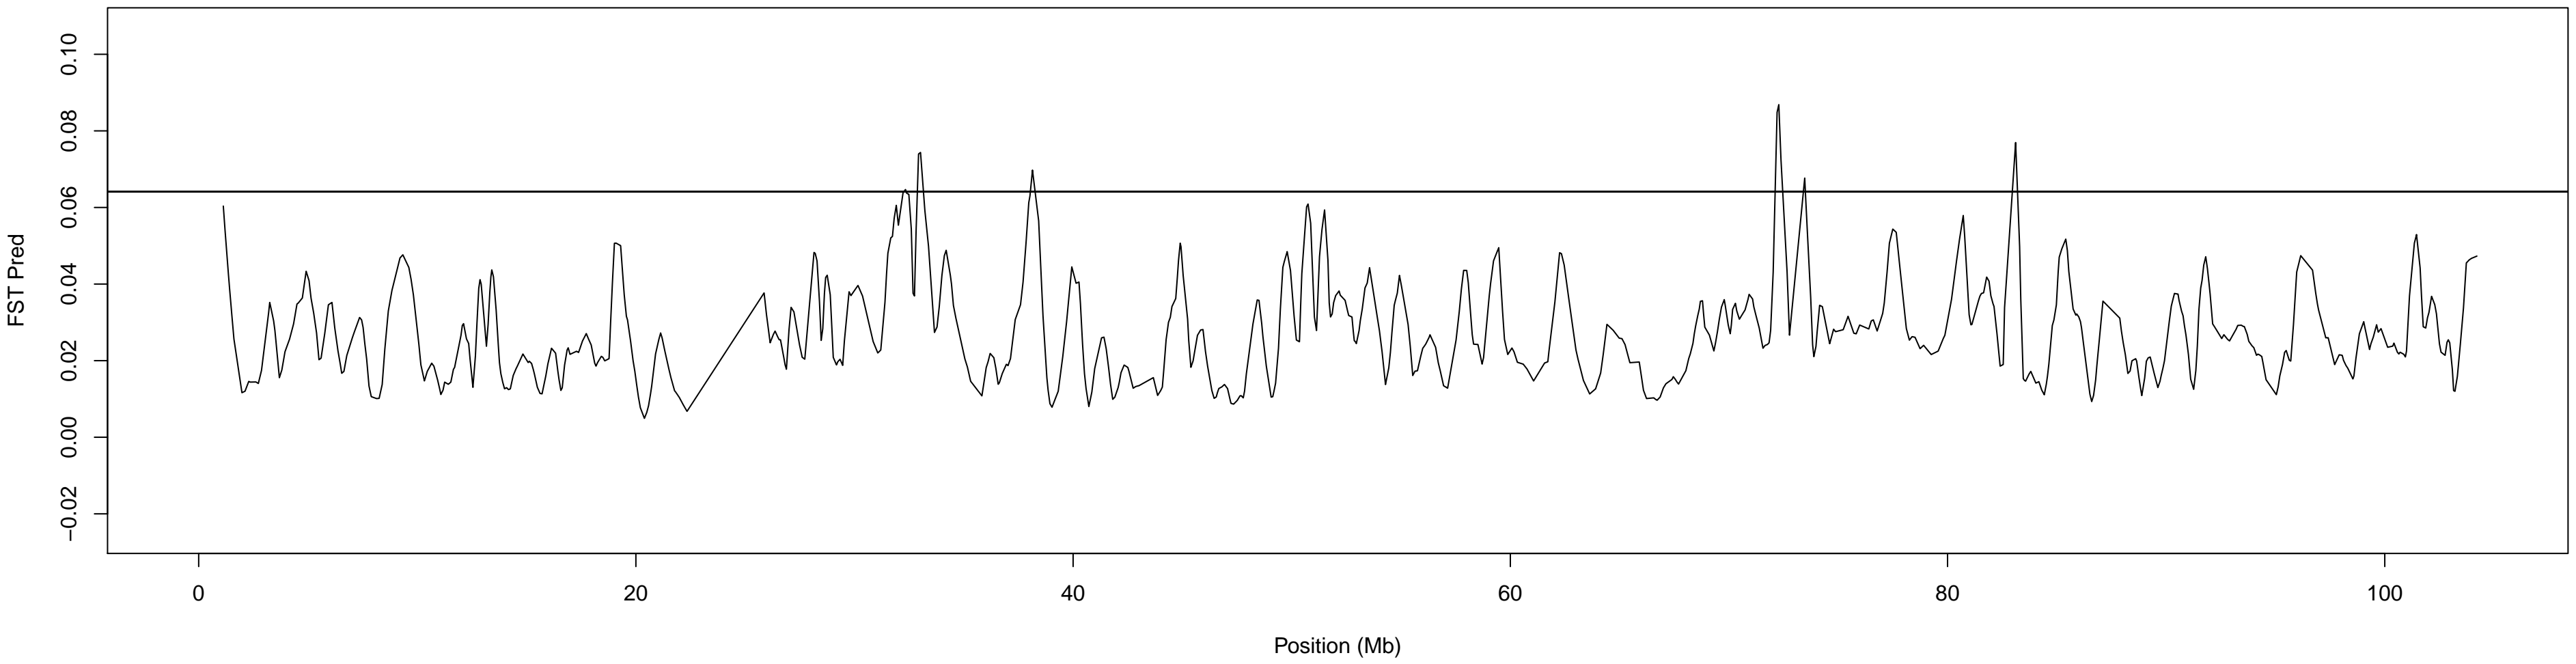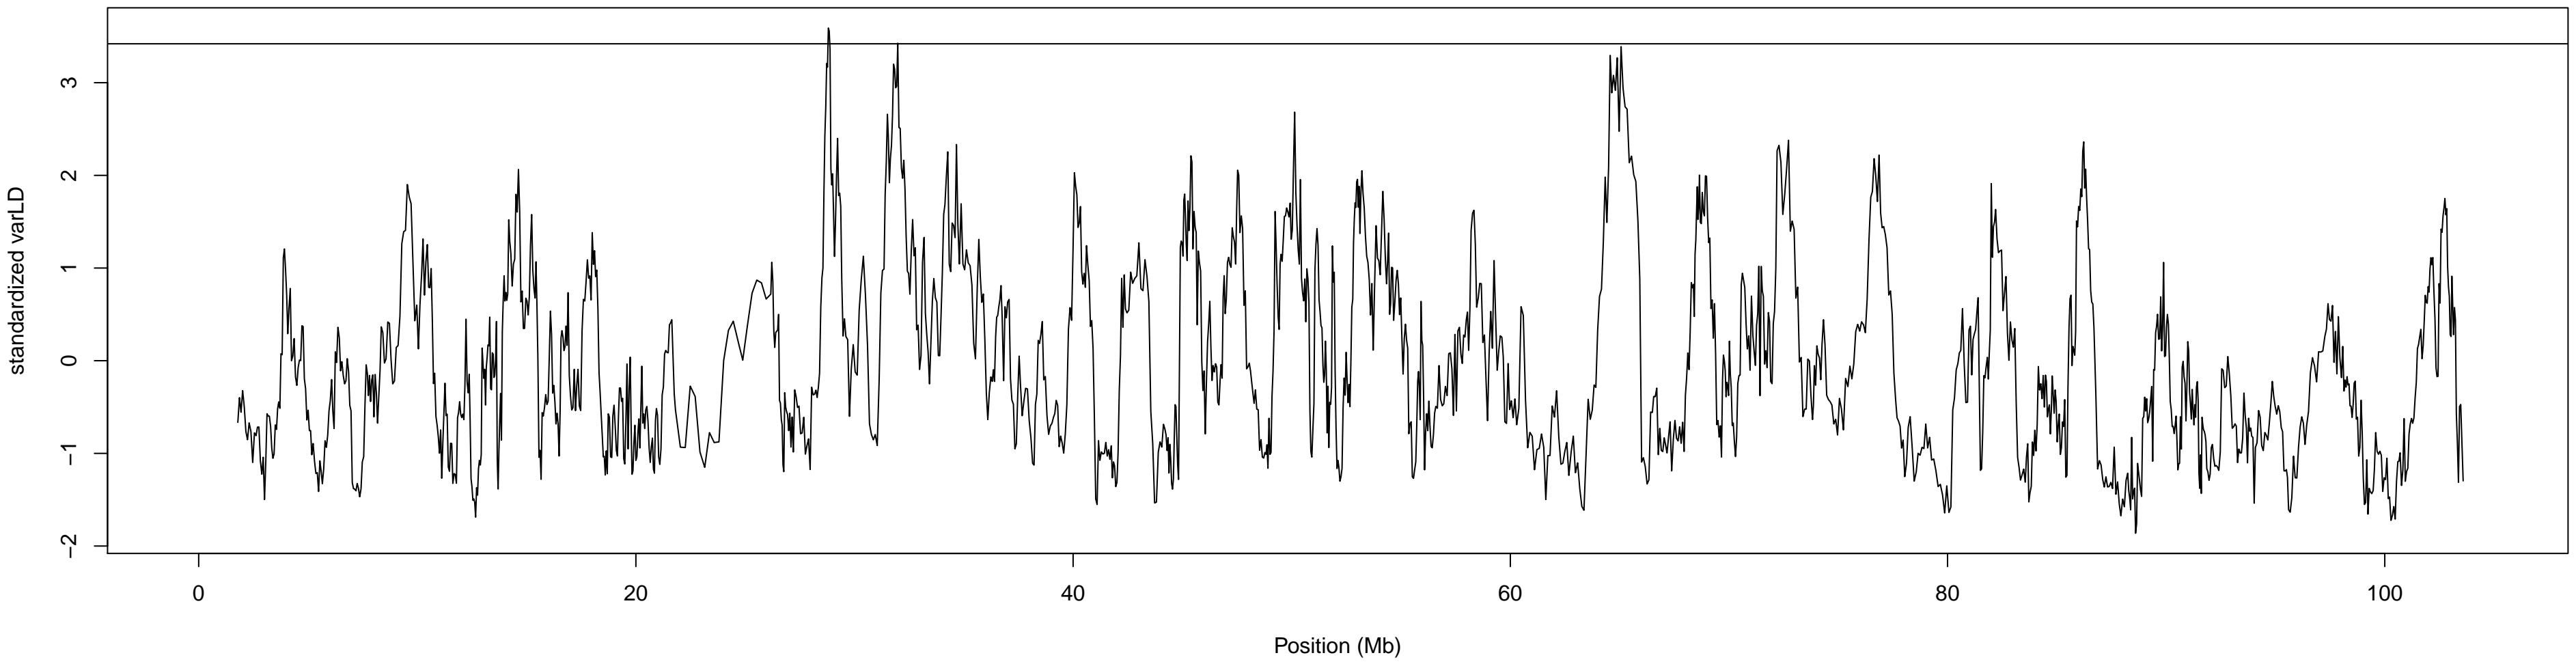

# FST VS varLD BTA 11

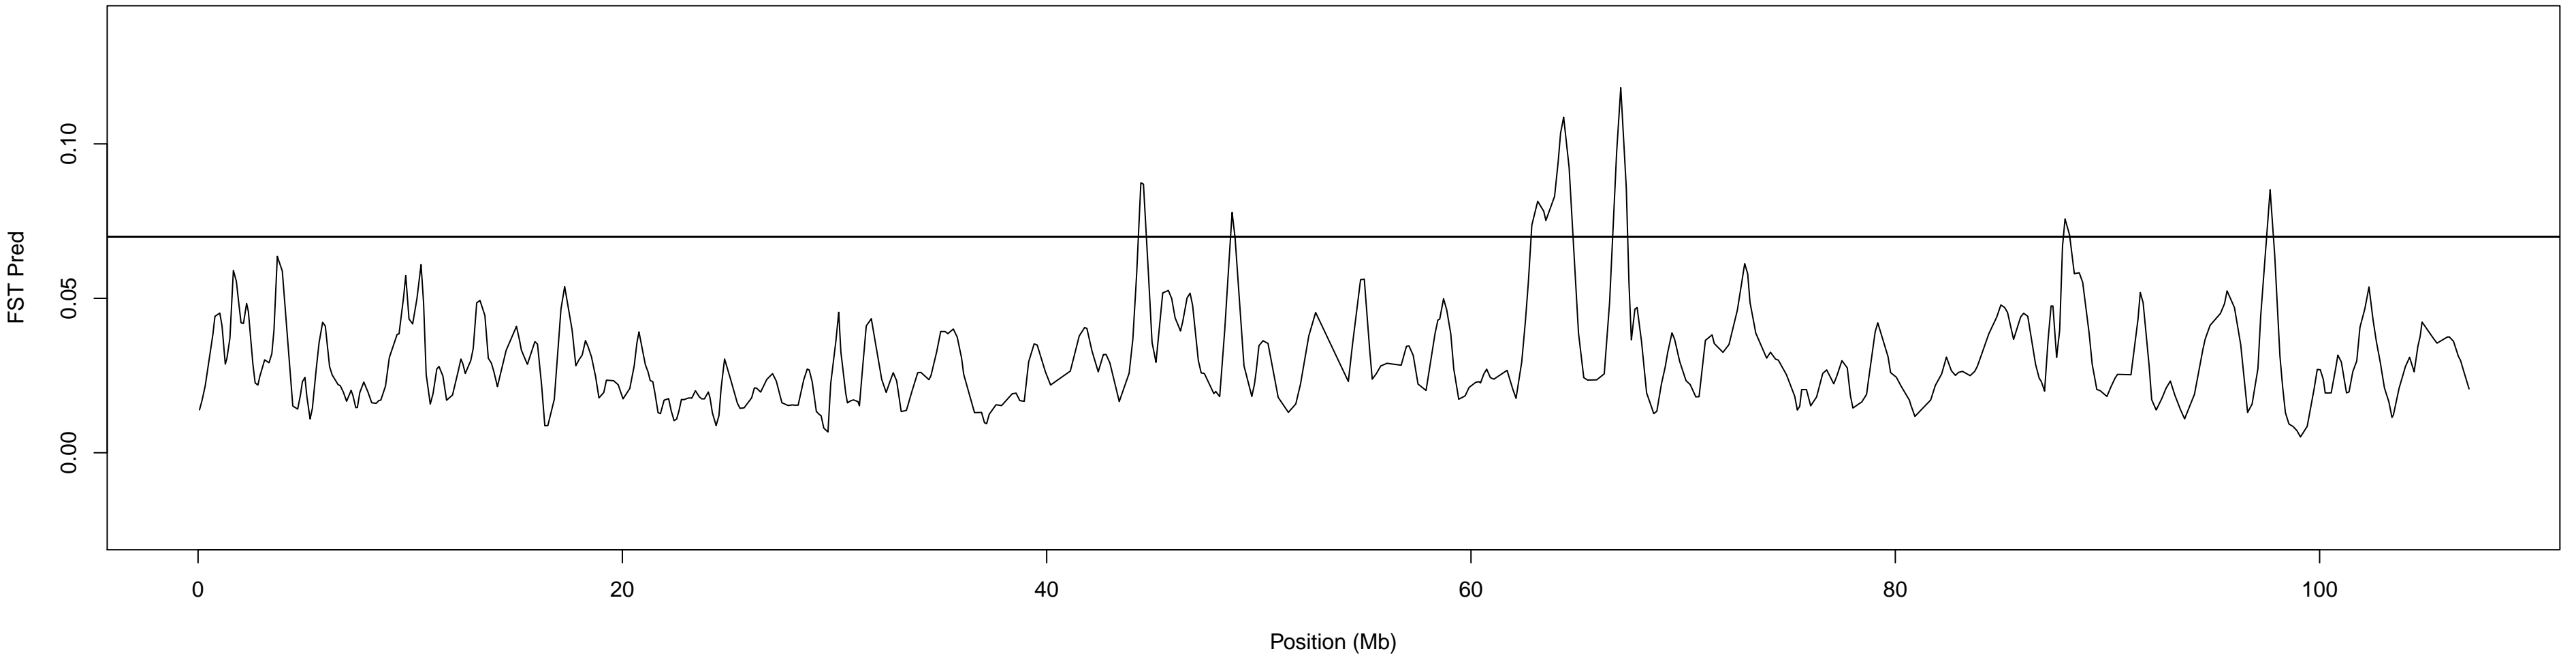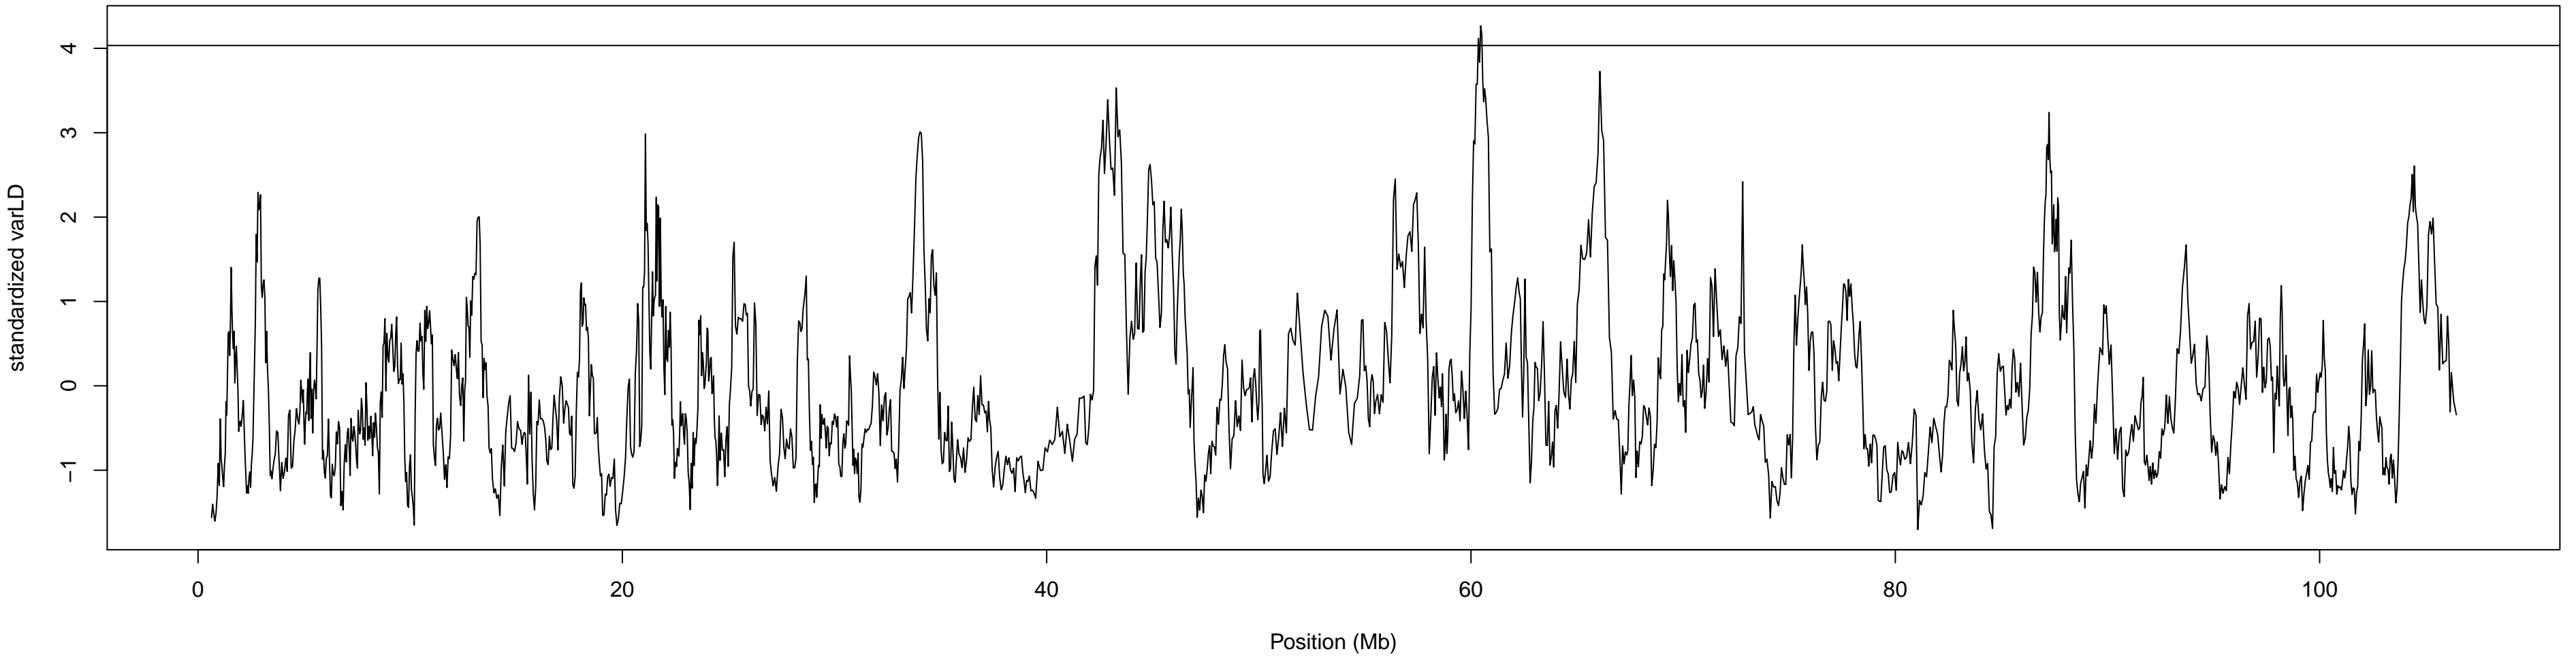

FST VS varLD BTA 12

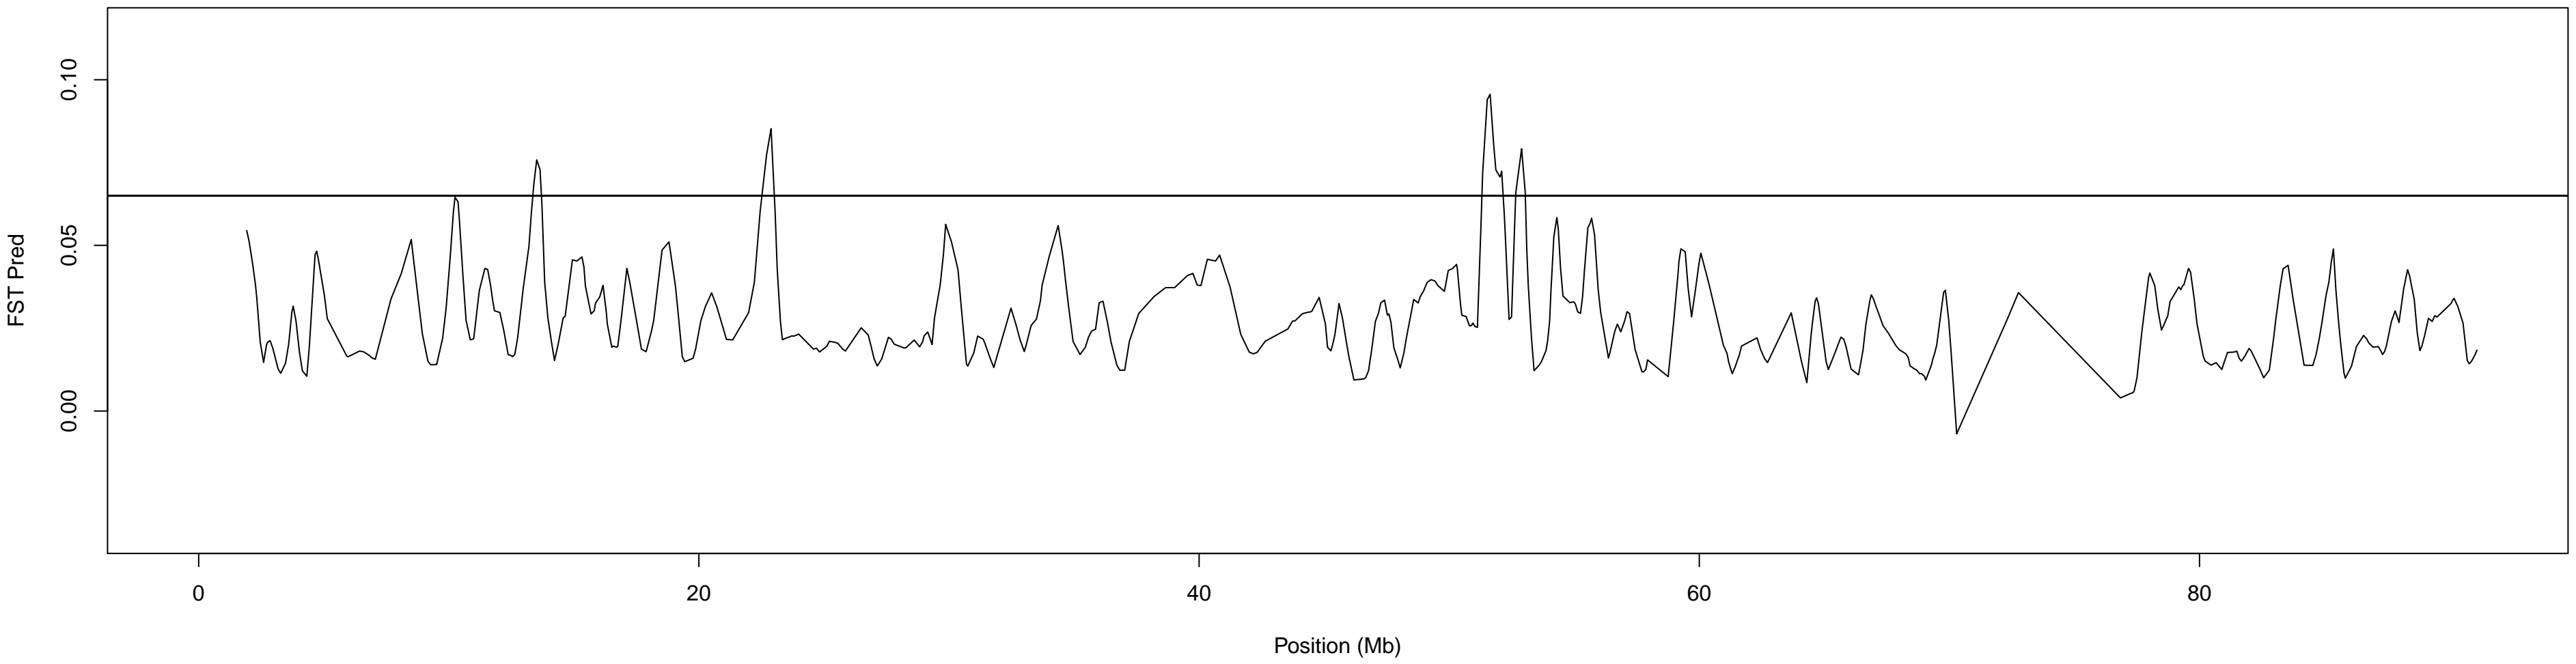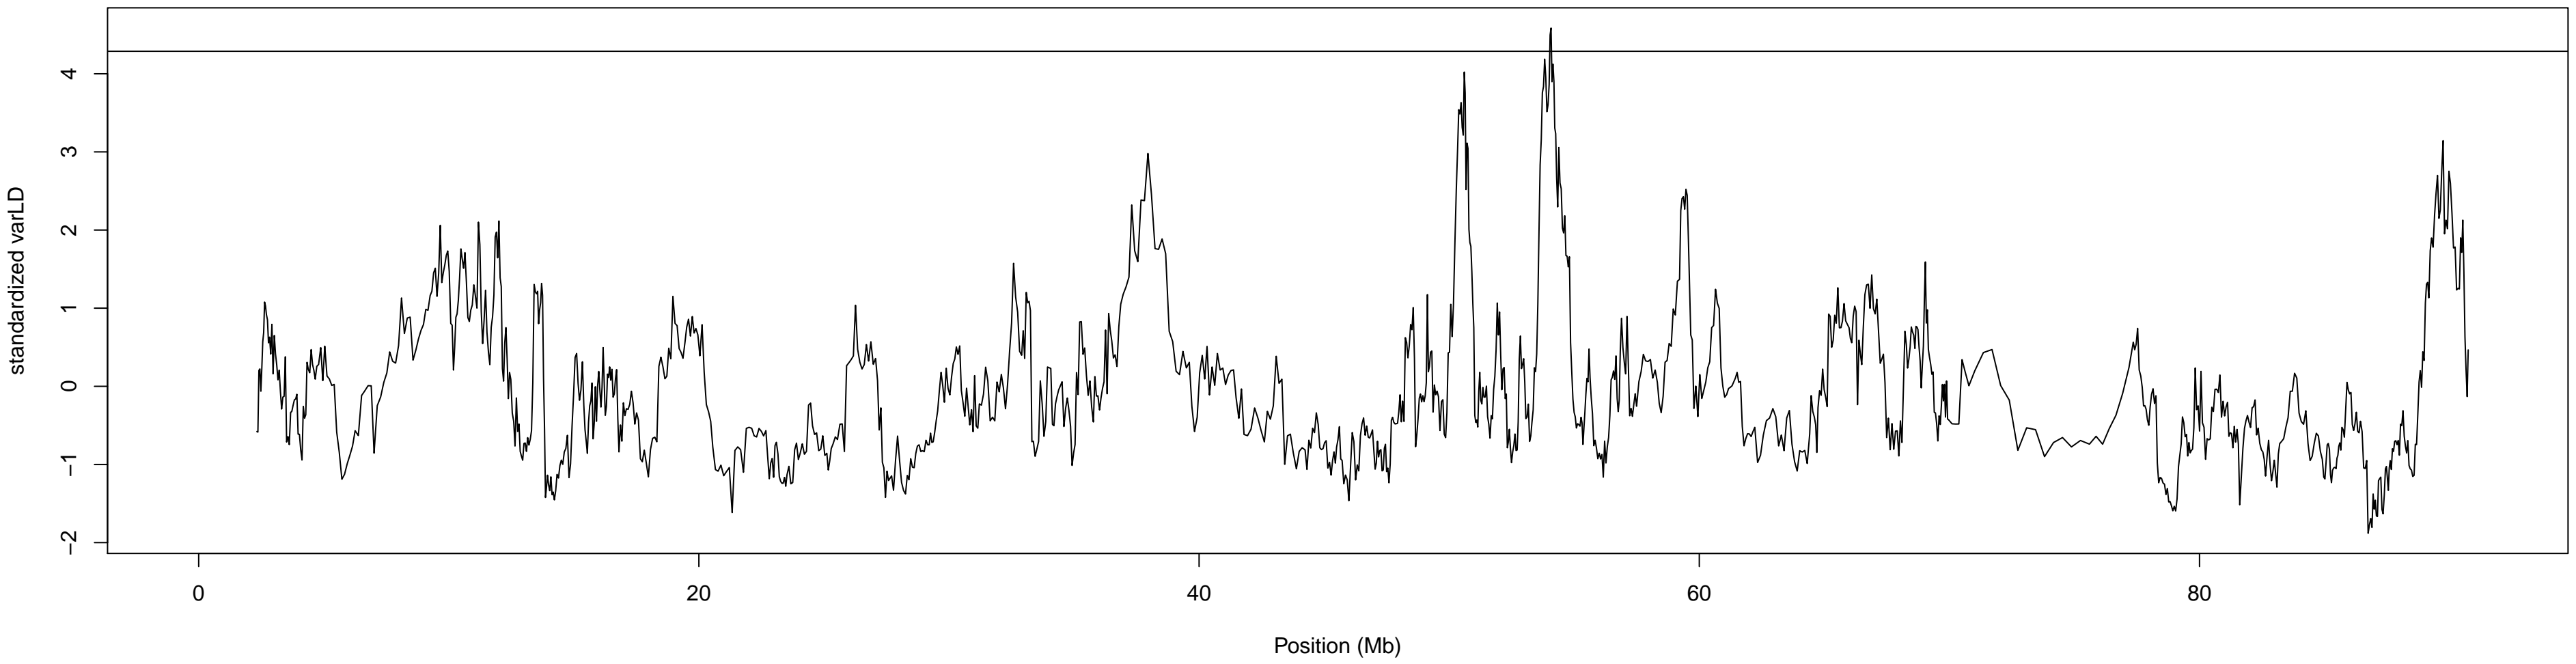

# FST VS varLD BTA 13

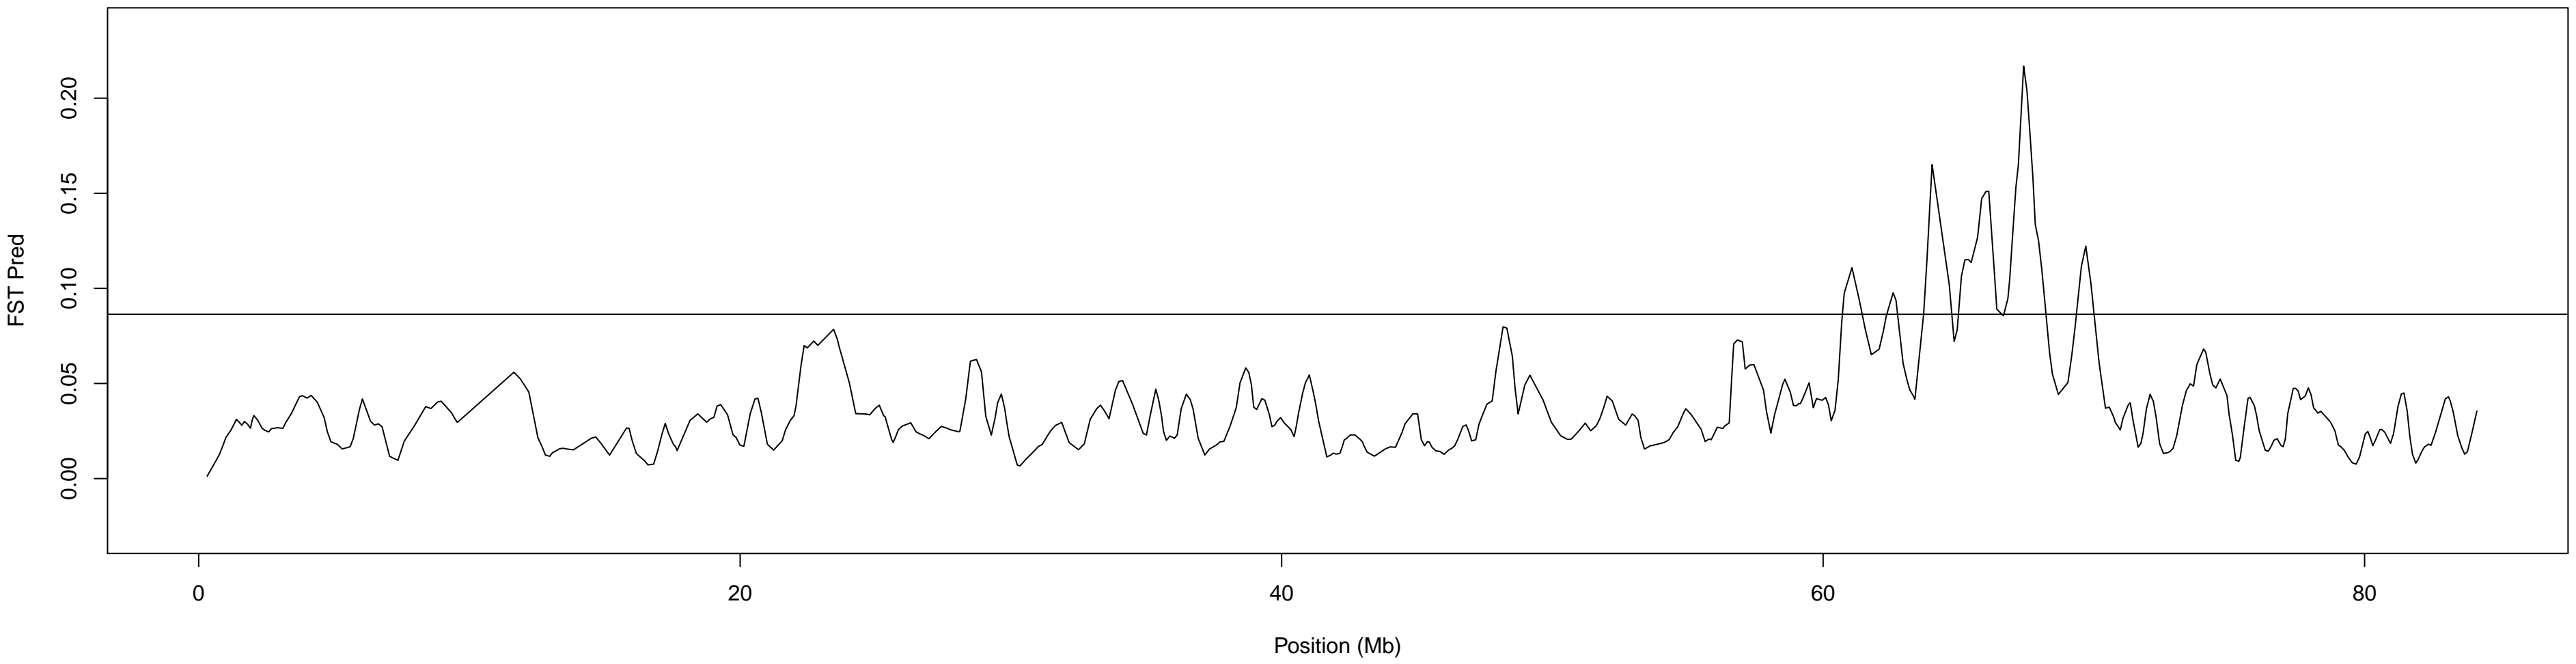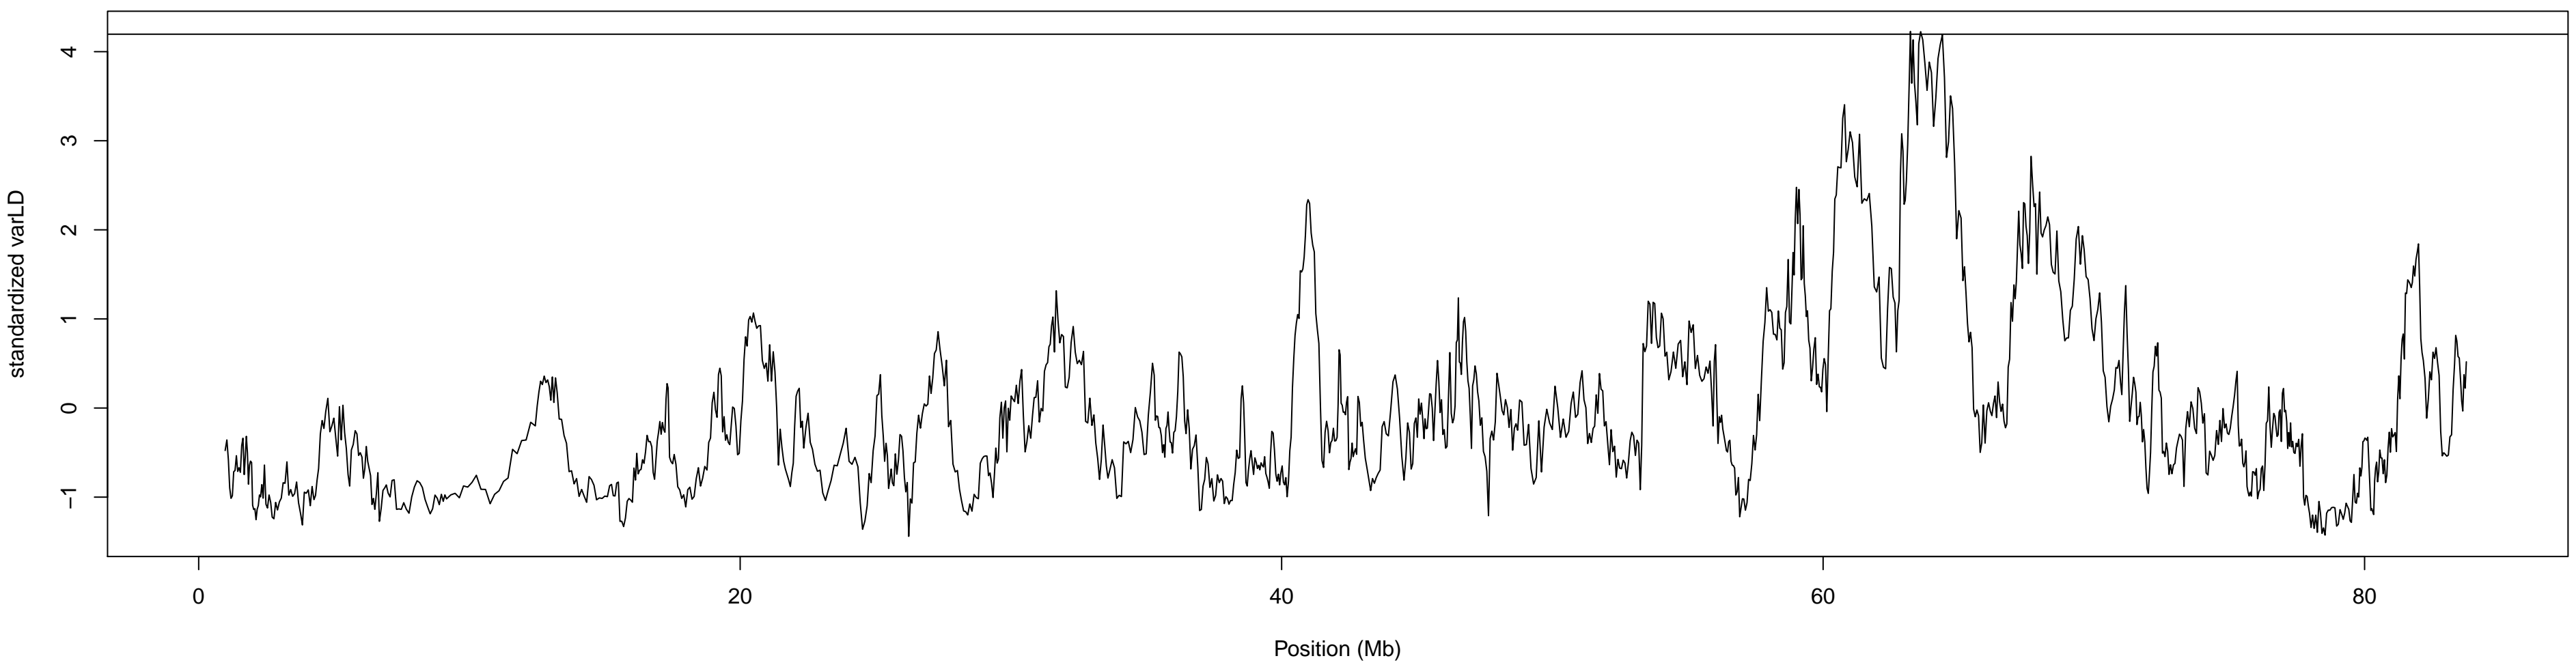

# FST VS varLD BTA 14

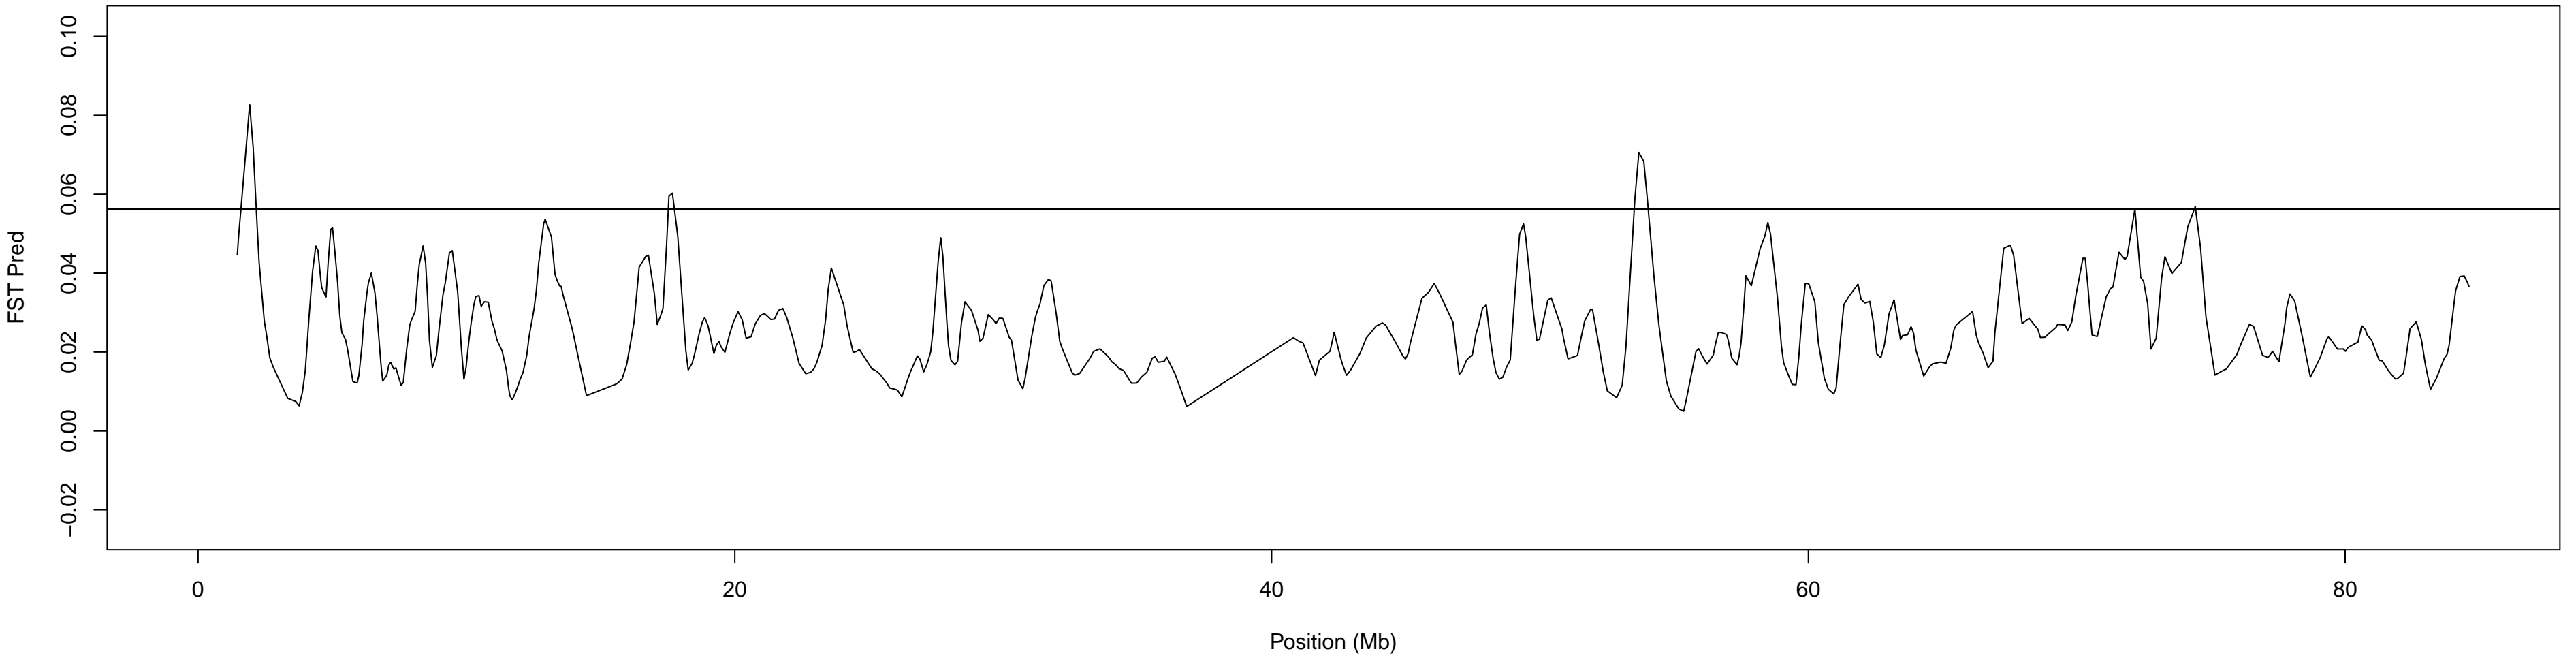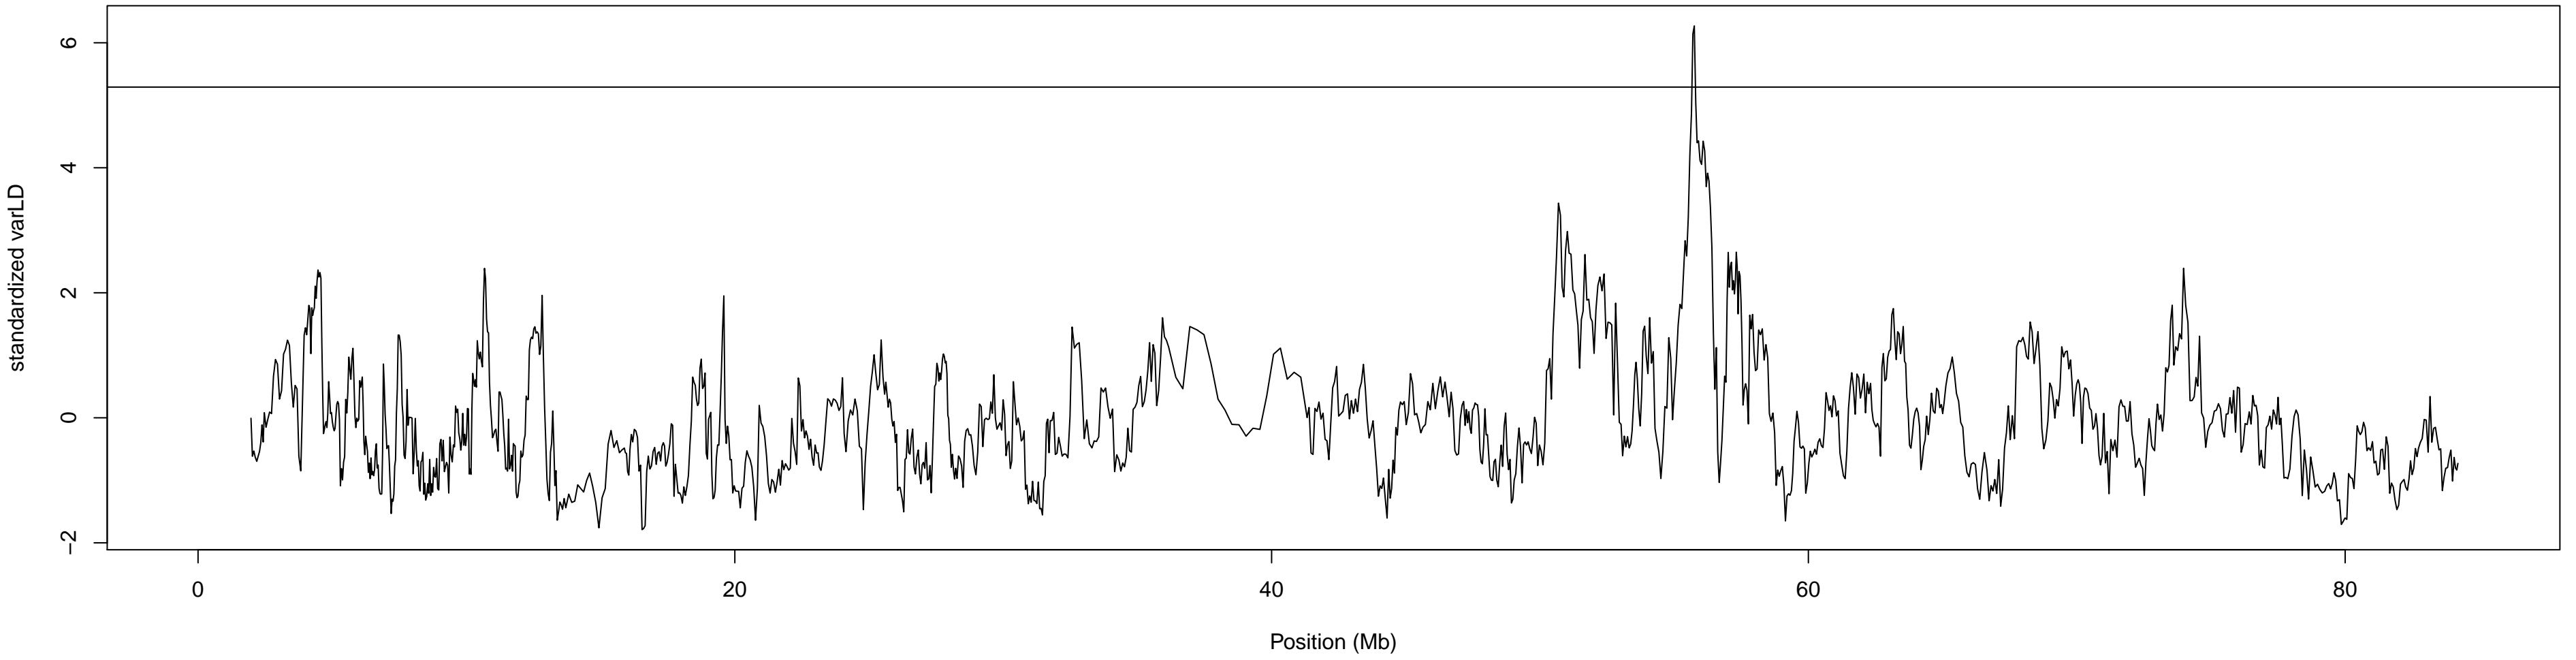

# FST VS varLD BTA 15

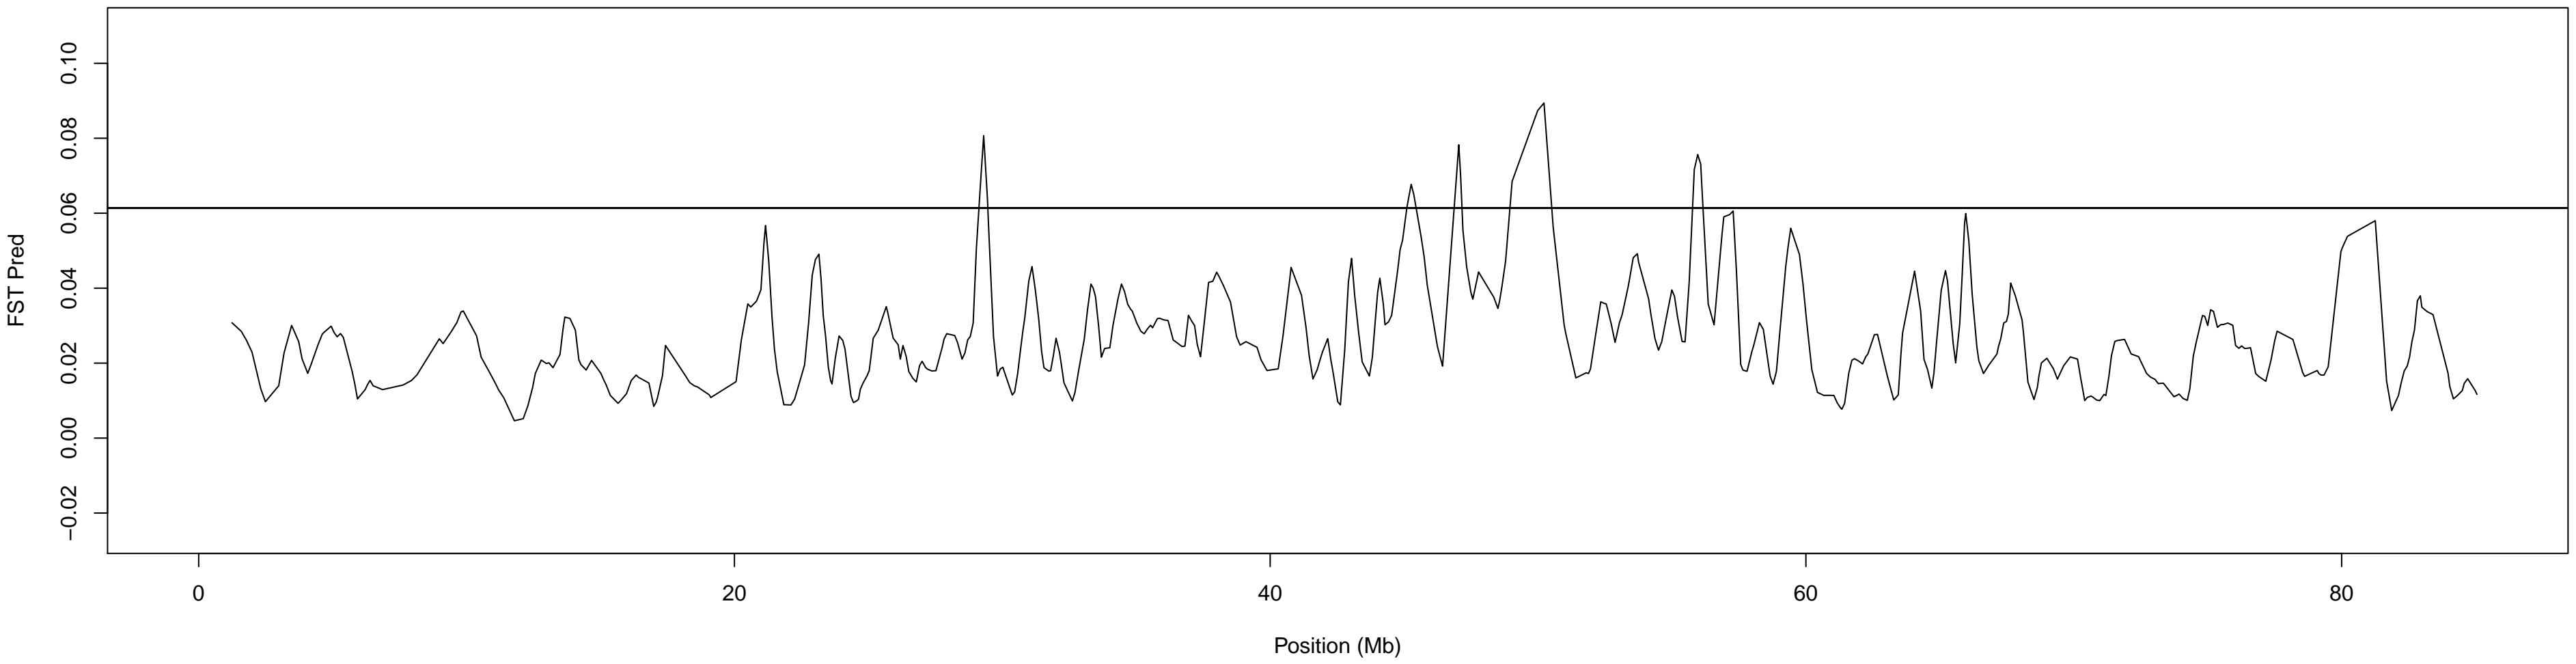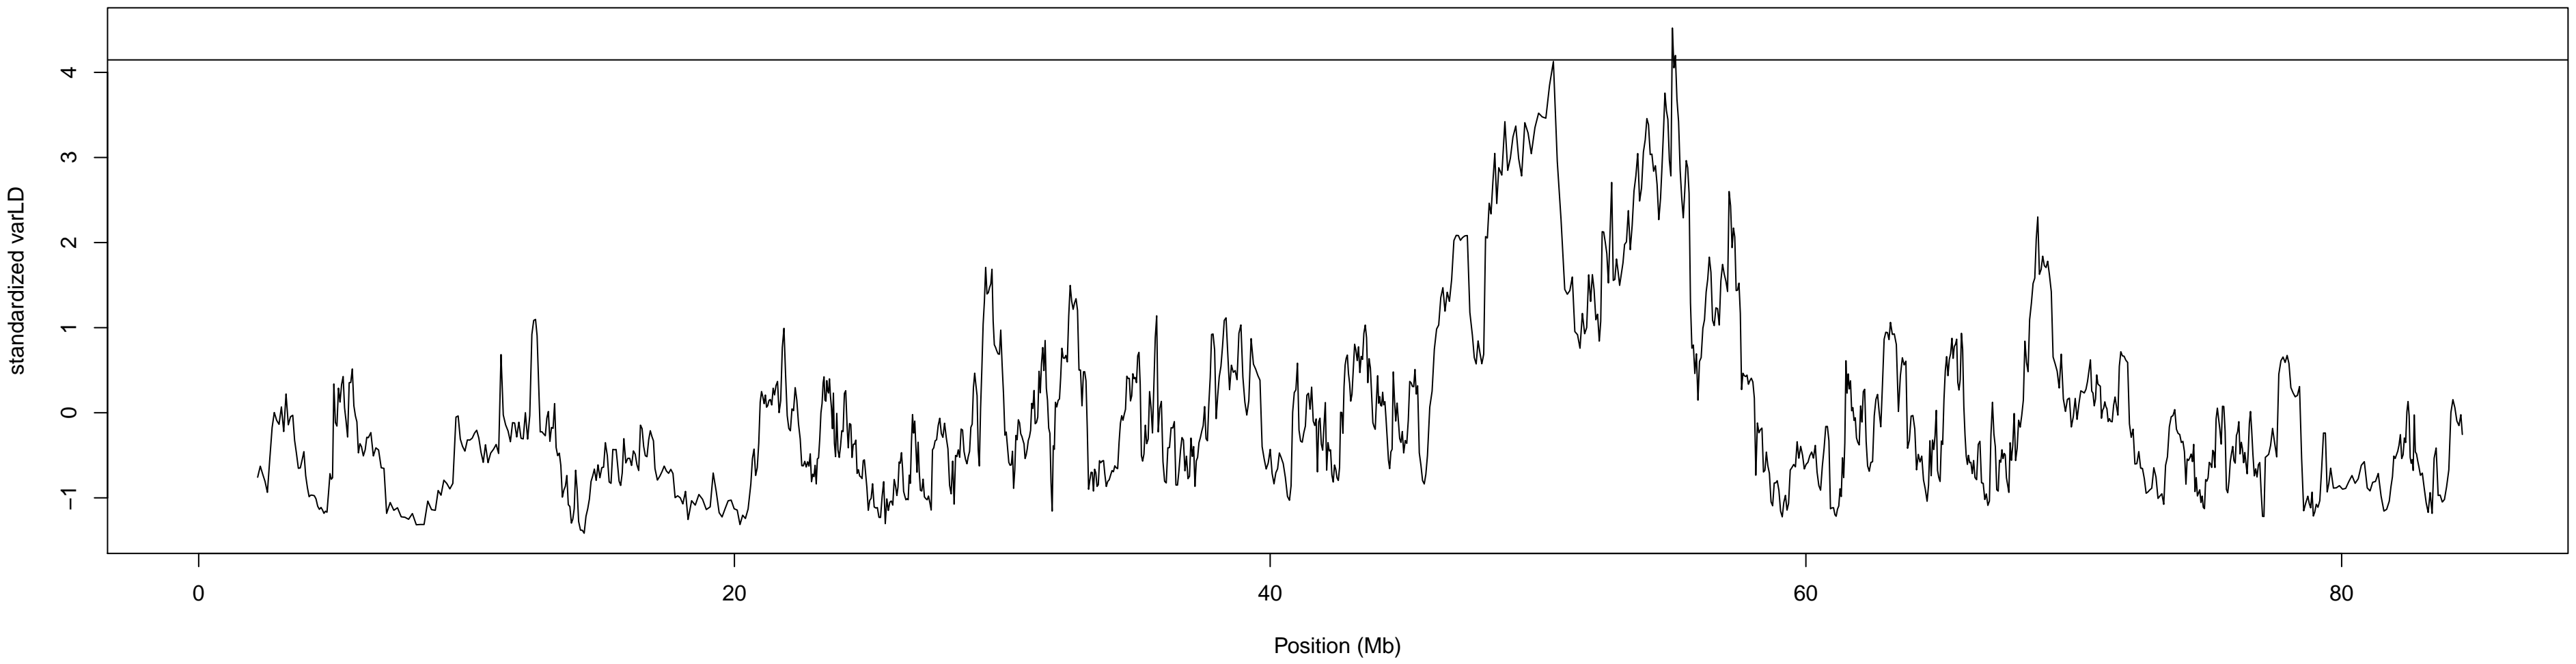

# FST VS varLD BTA 16

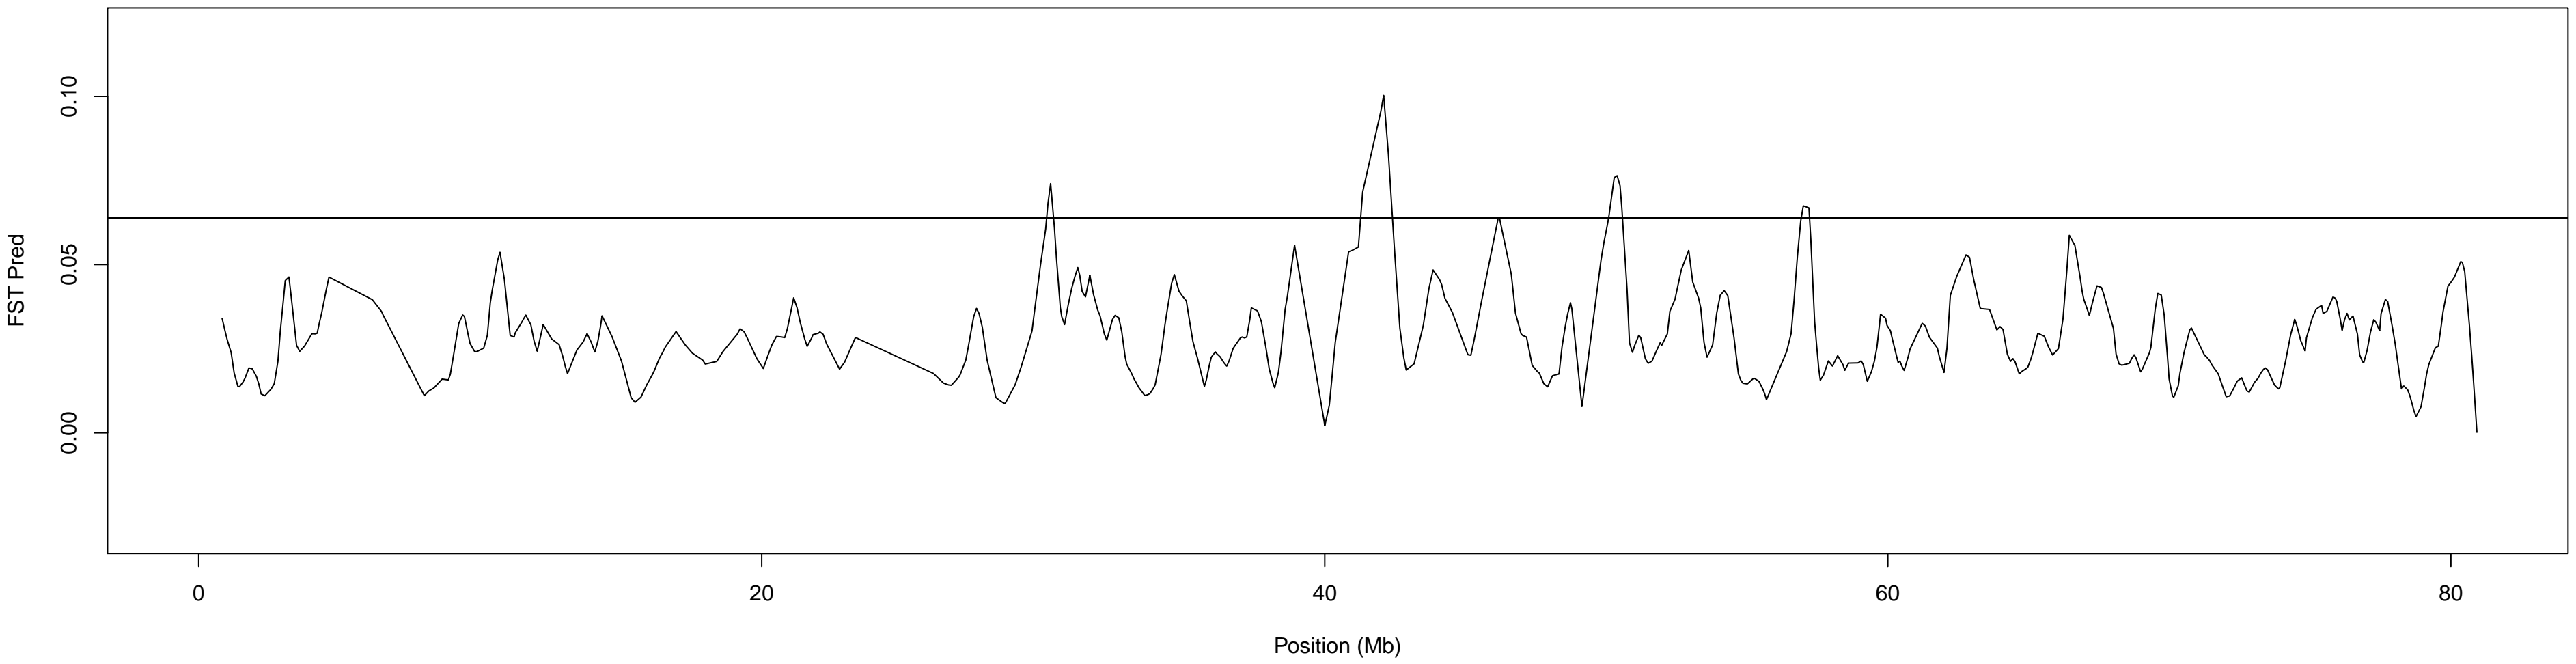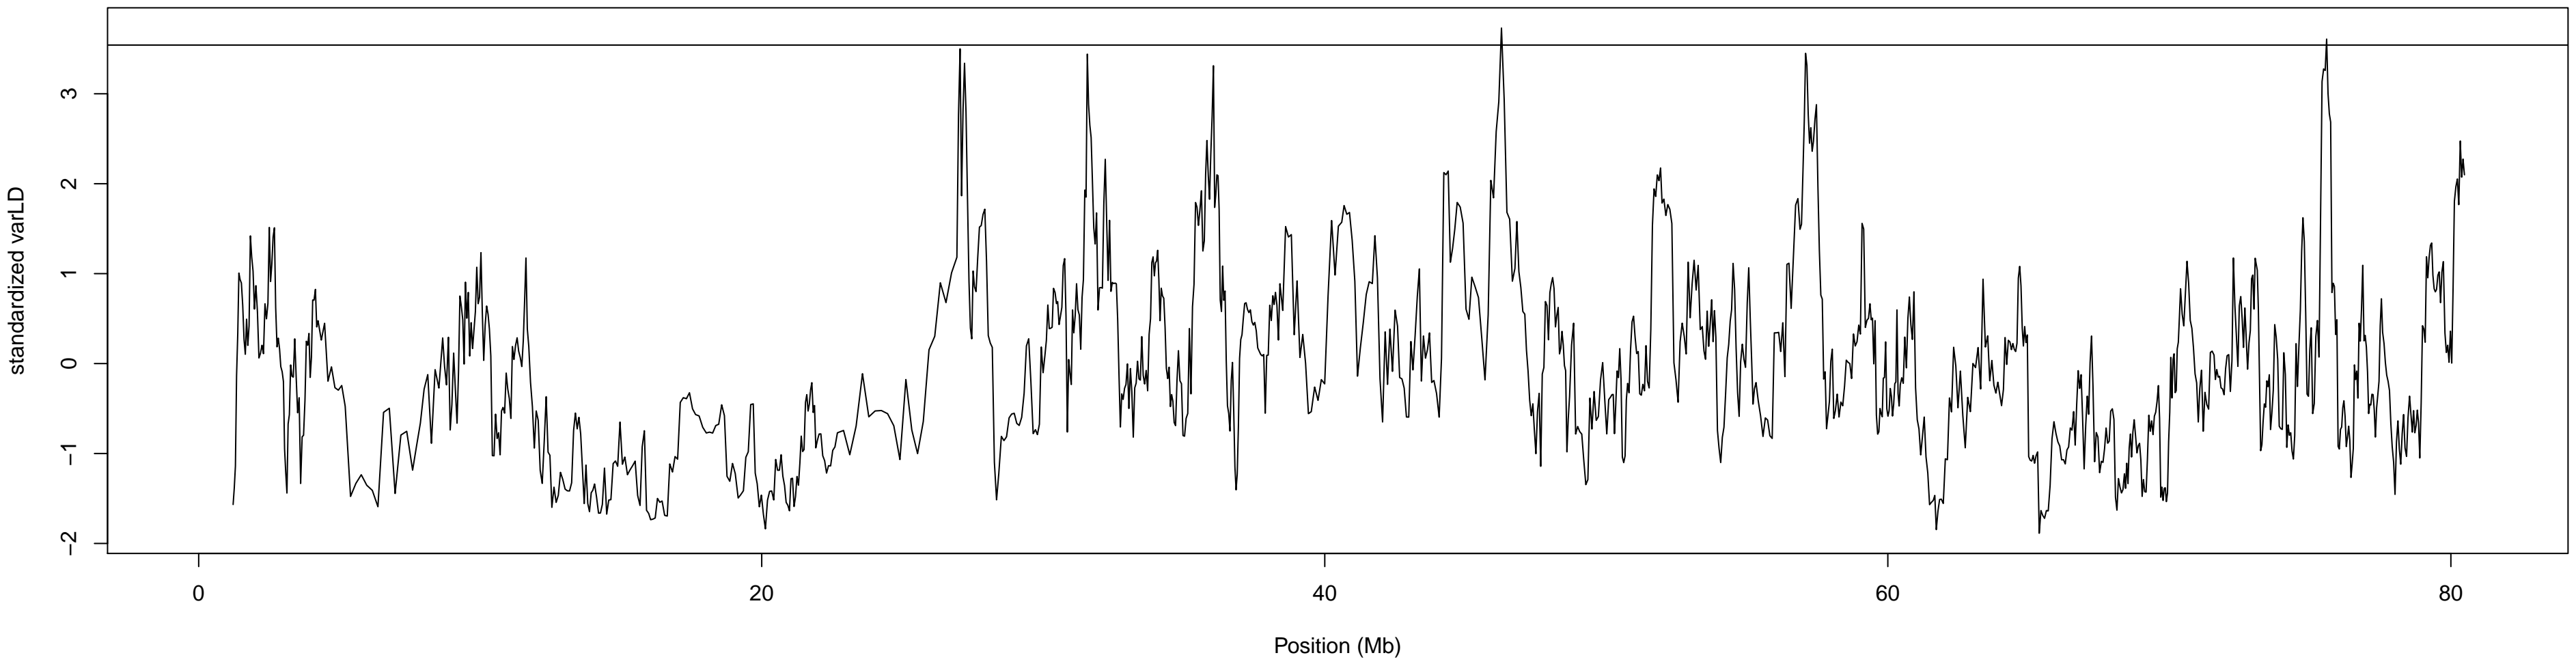



# FST VS varLD BTA 17

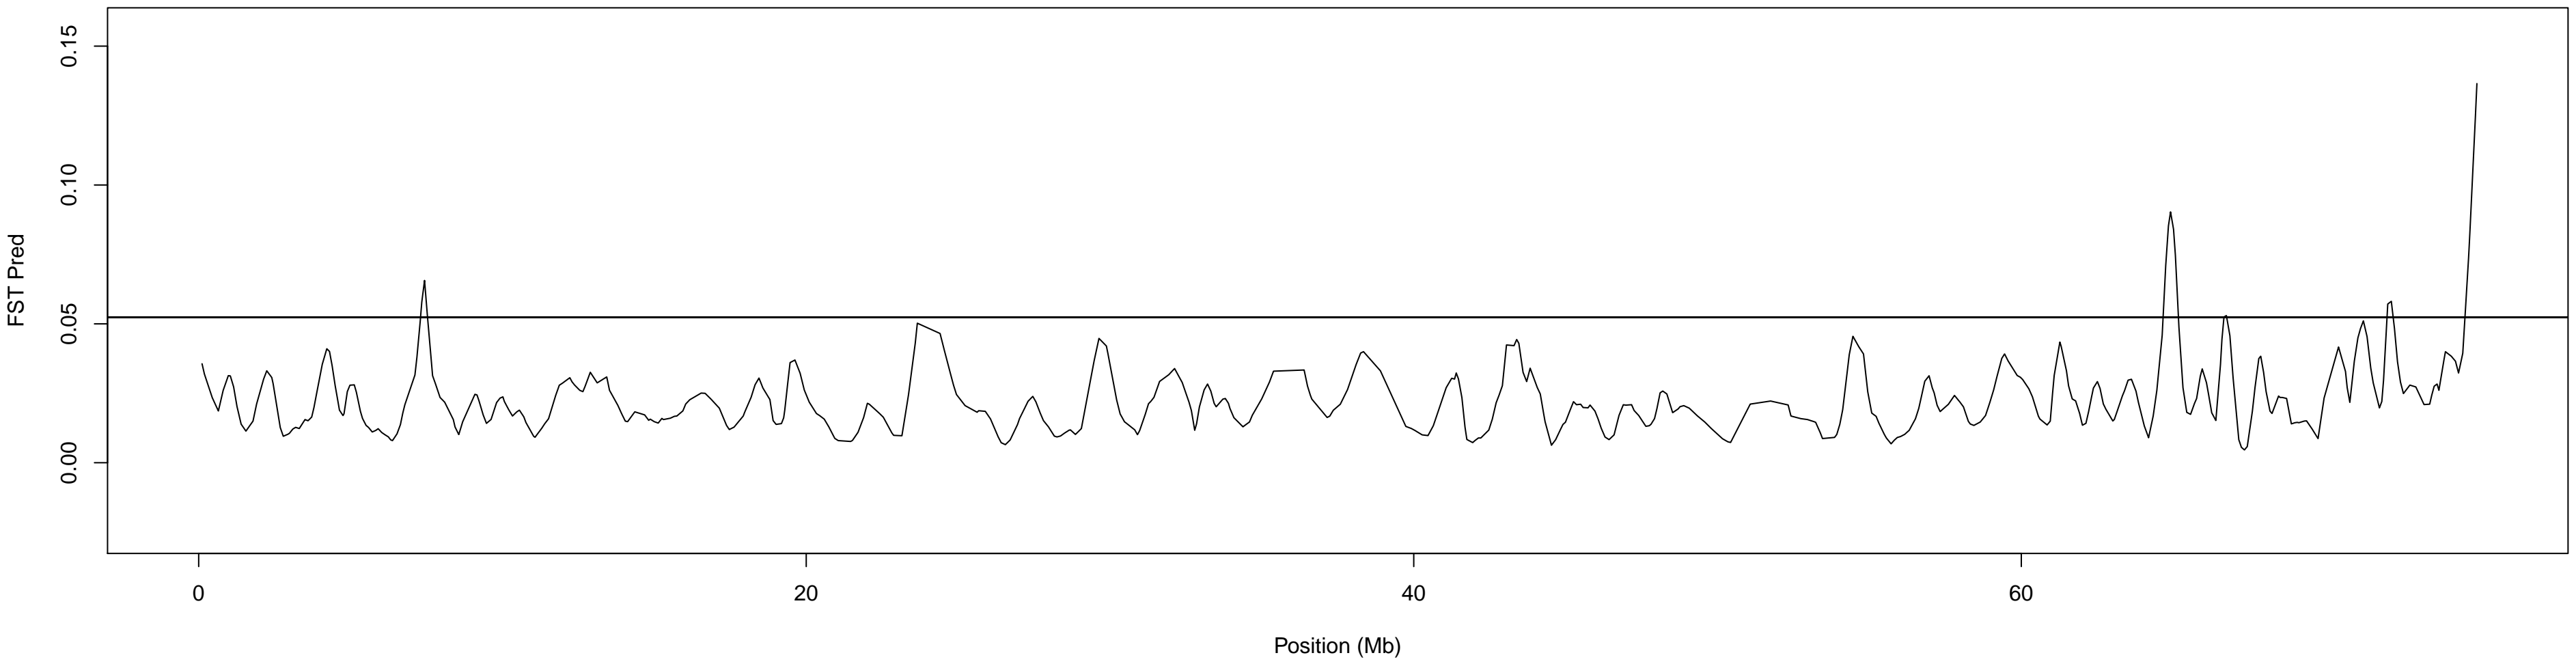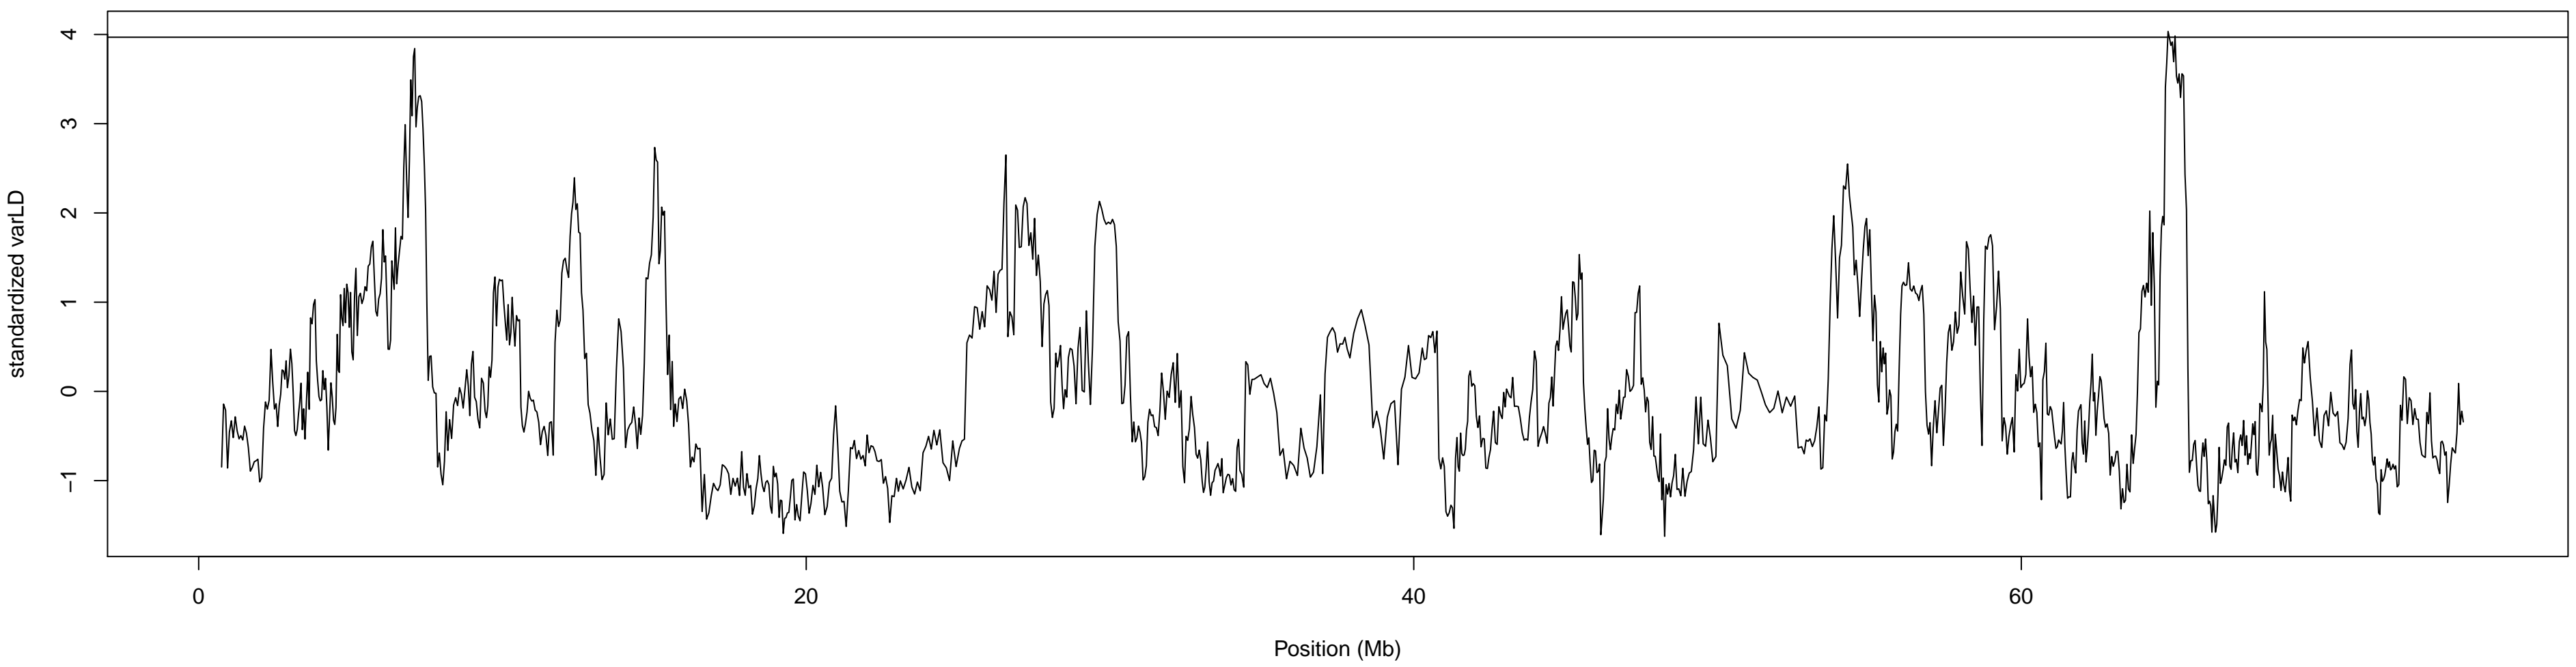

FST VS varLD BTA 18

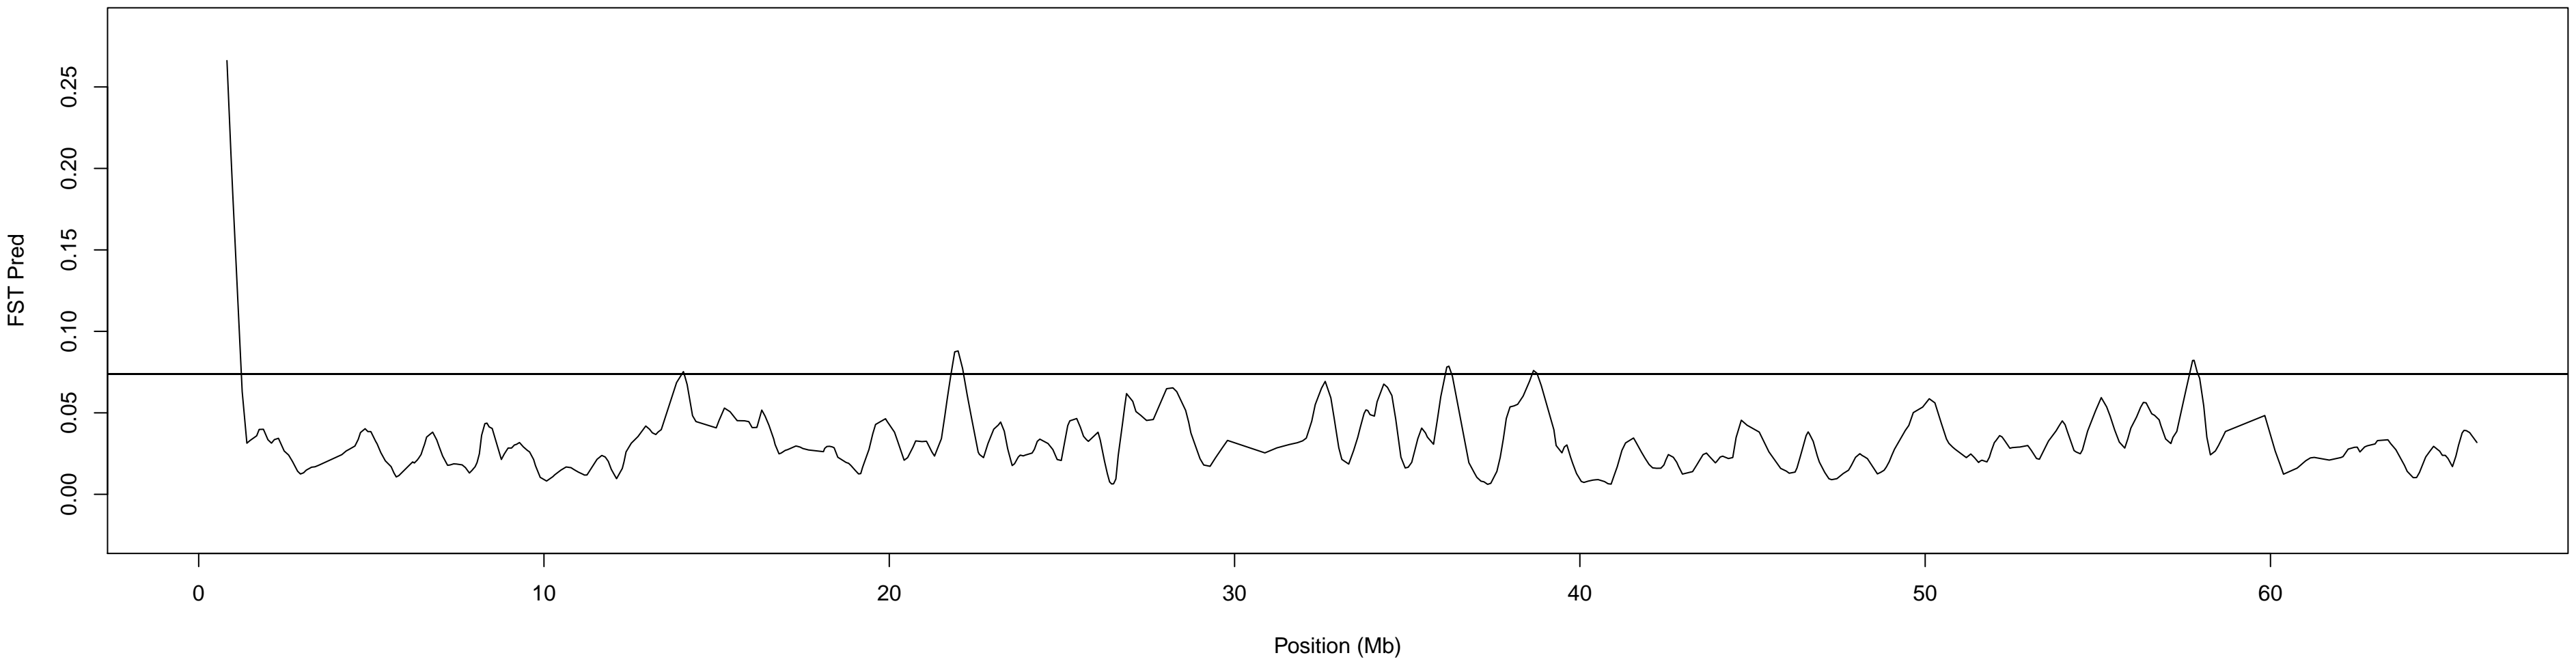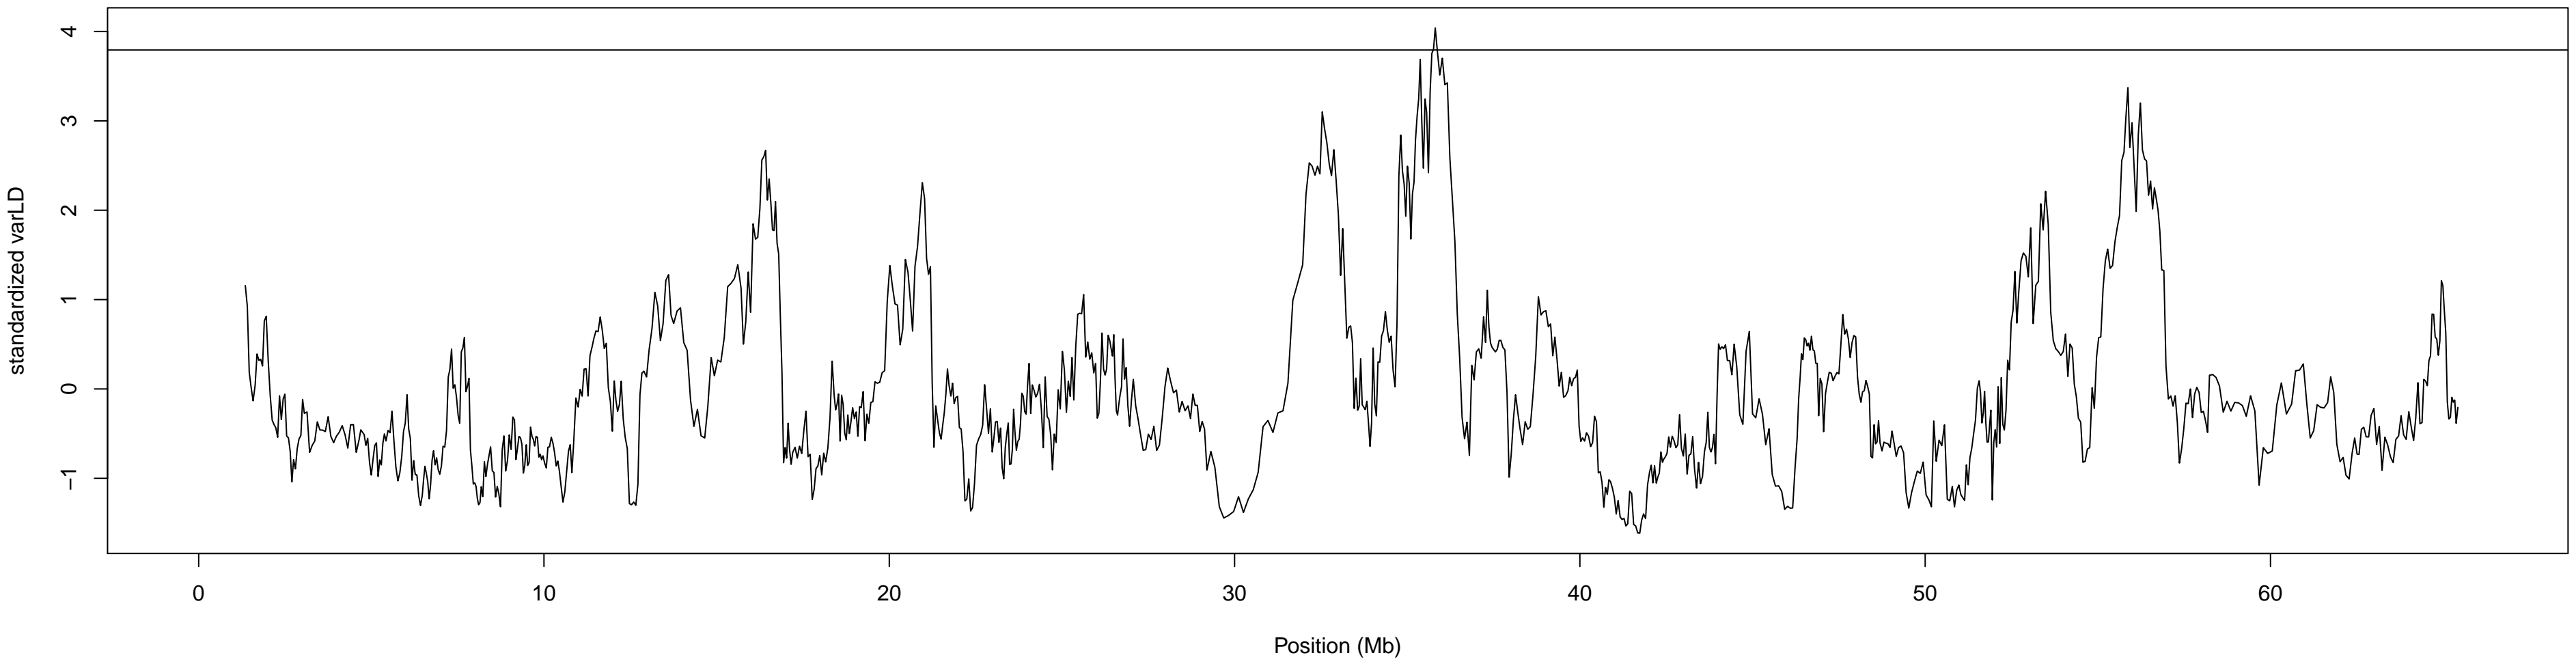

# FST VS varLD BTA 19

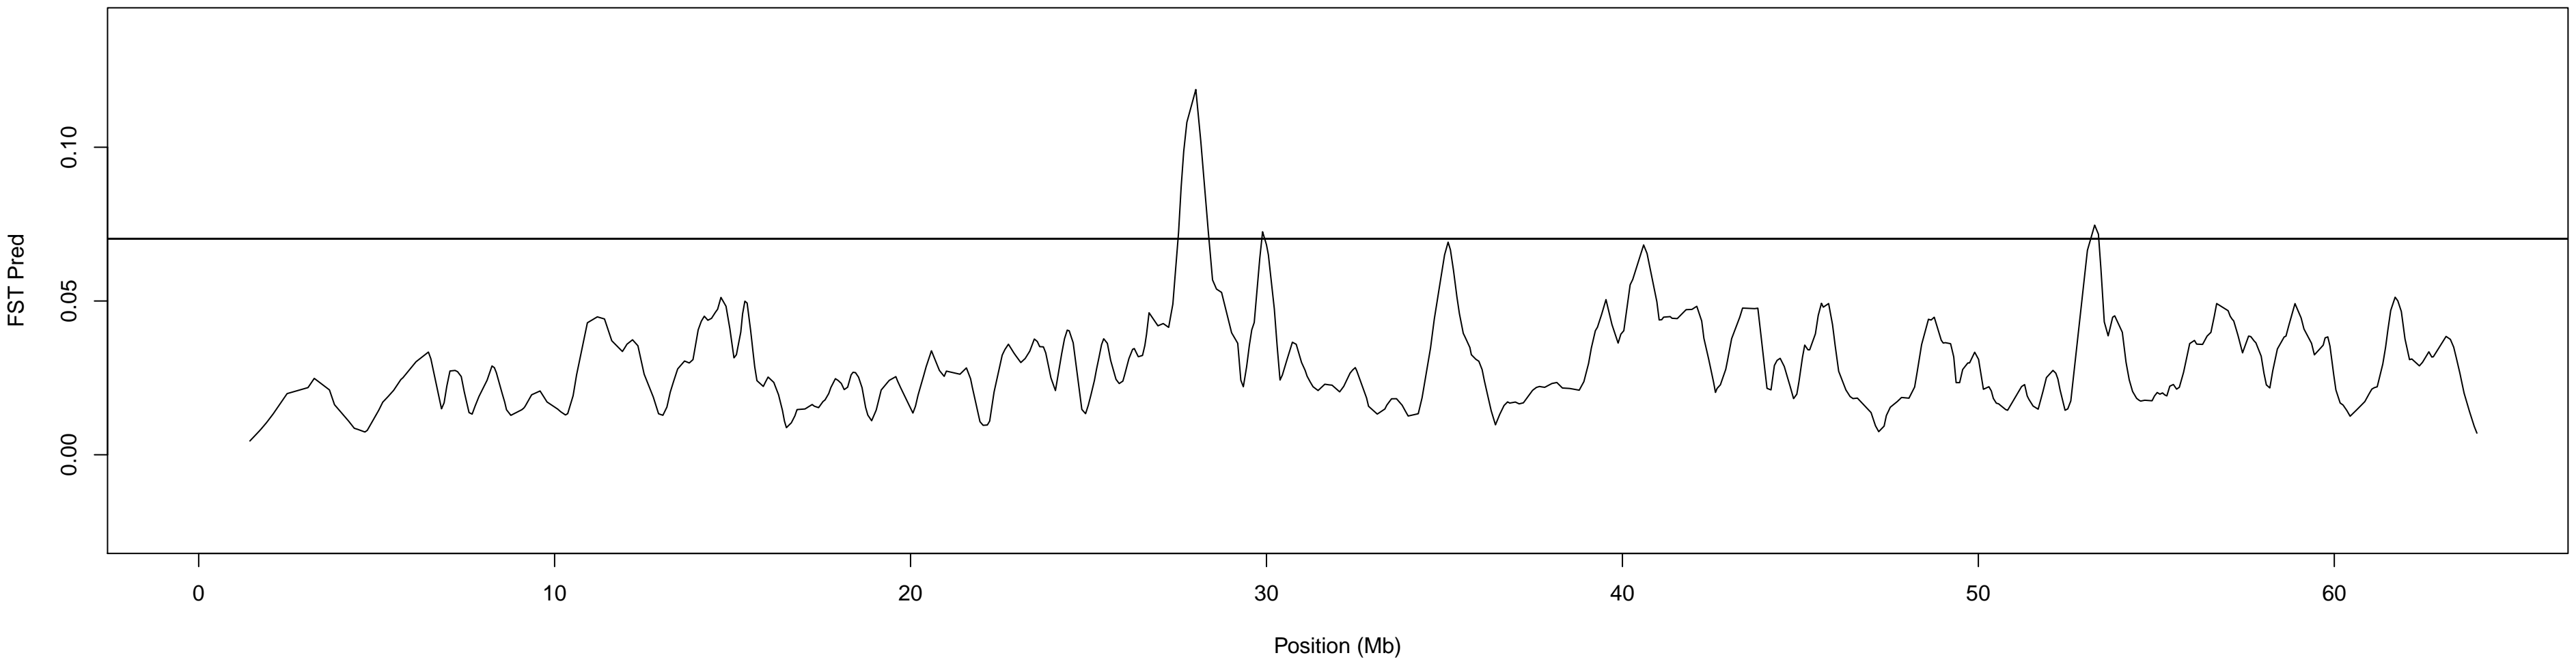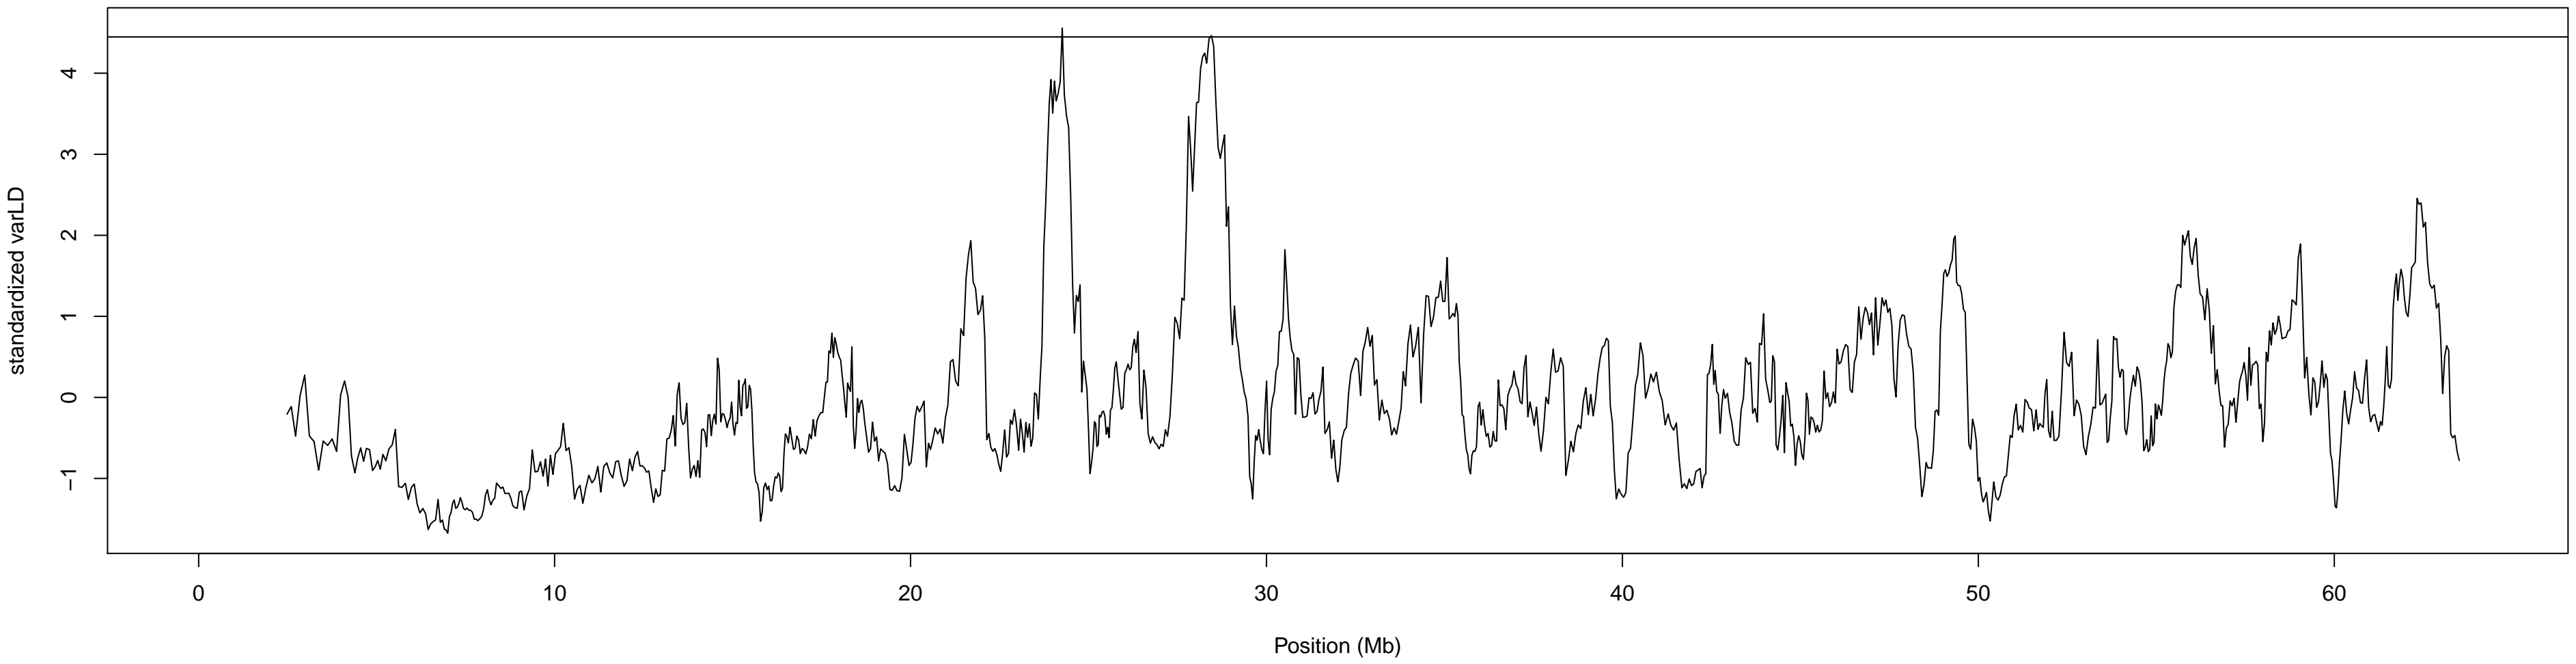

FST VS varLD BTA 20

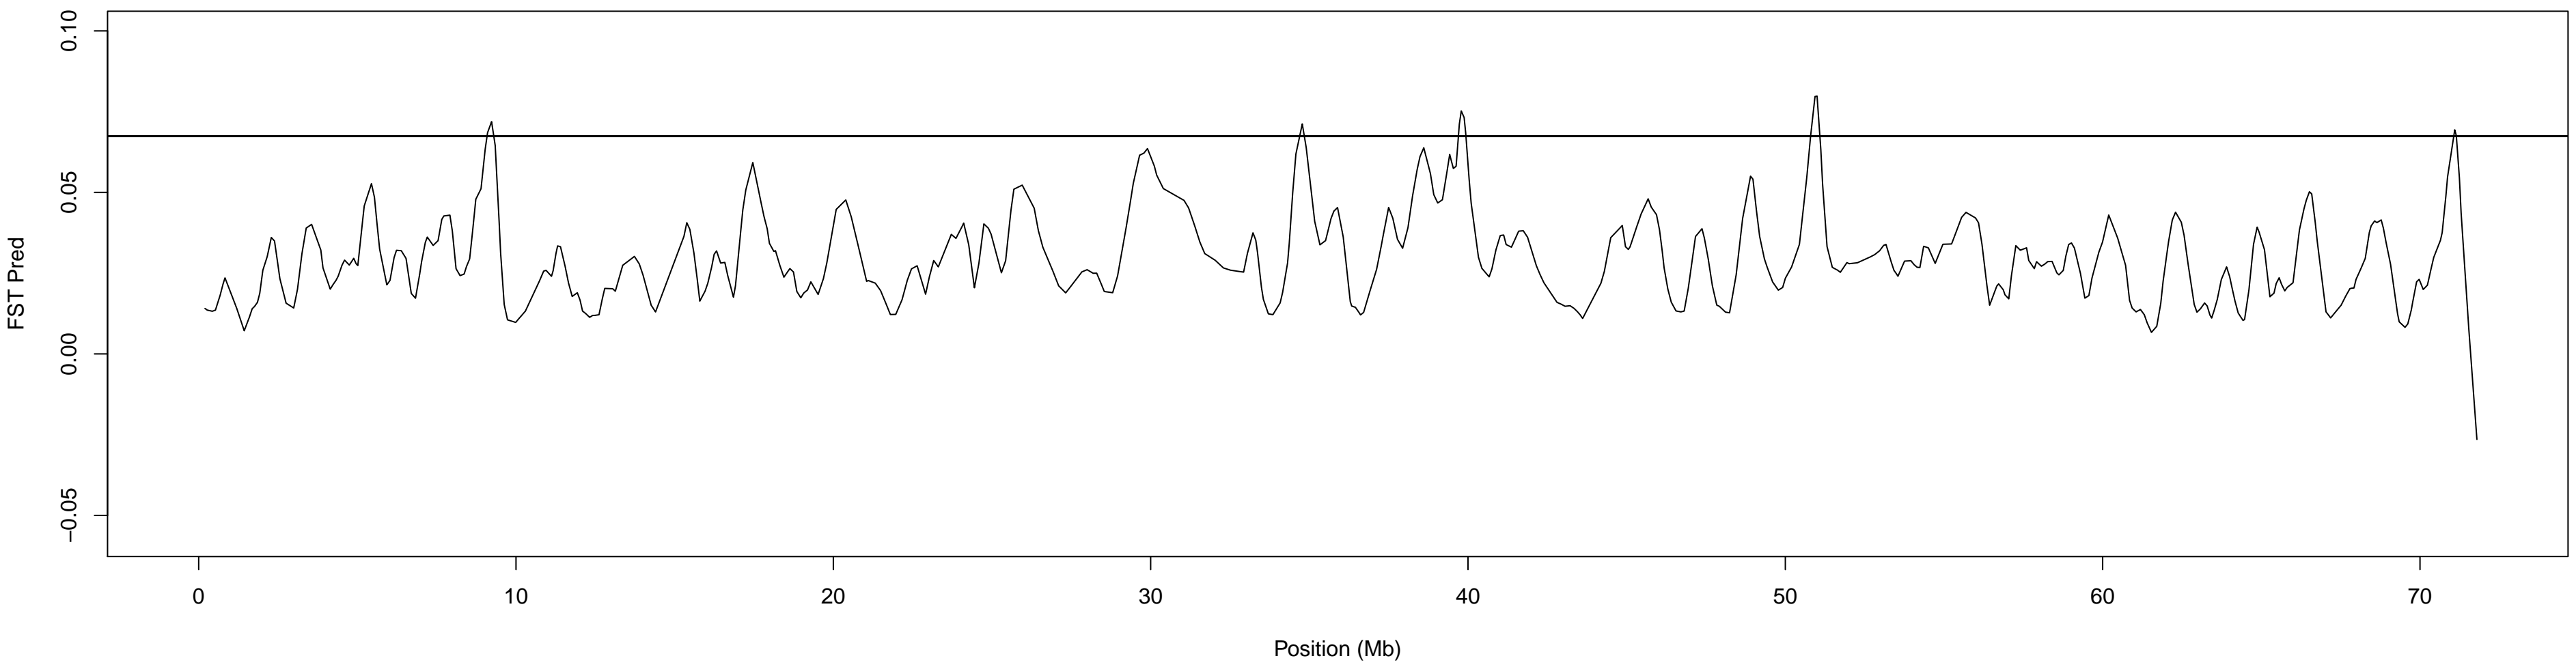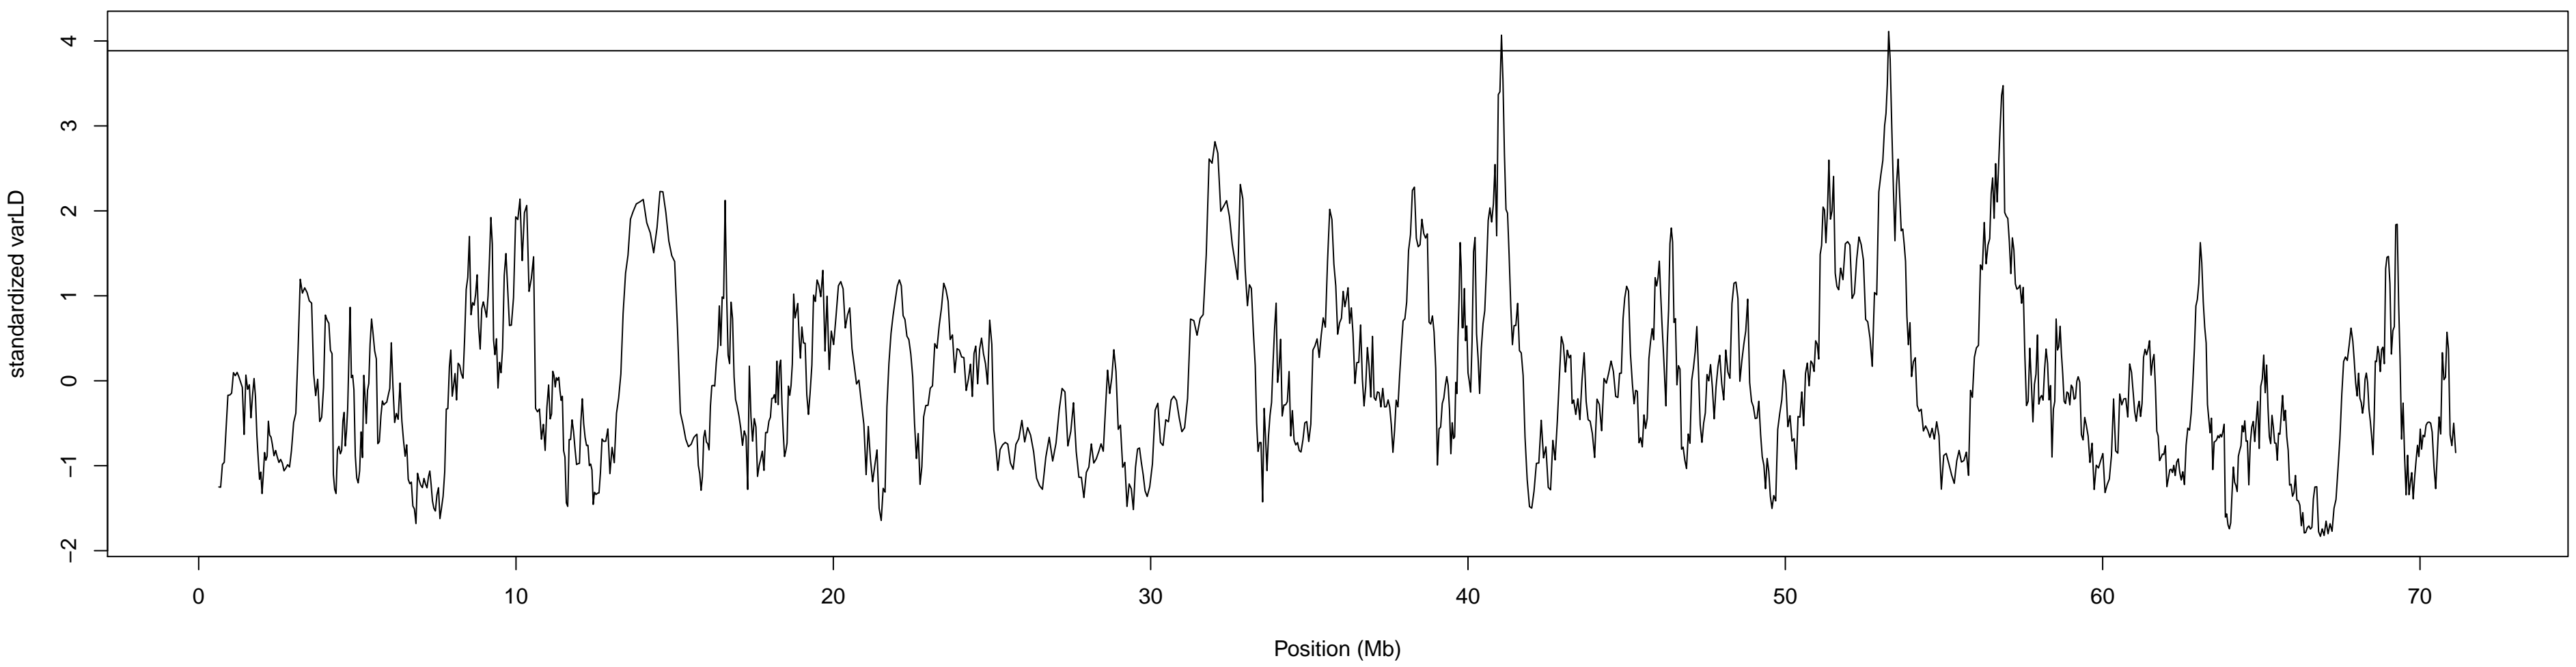

FST VS varLD BTA 21

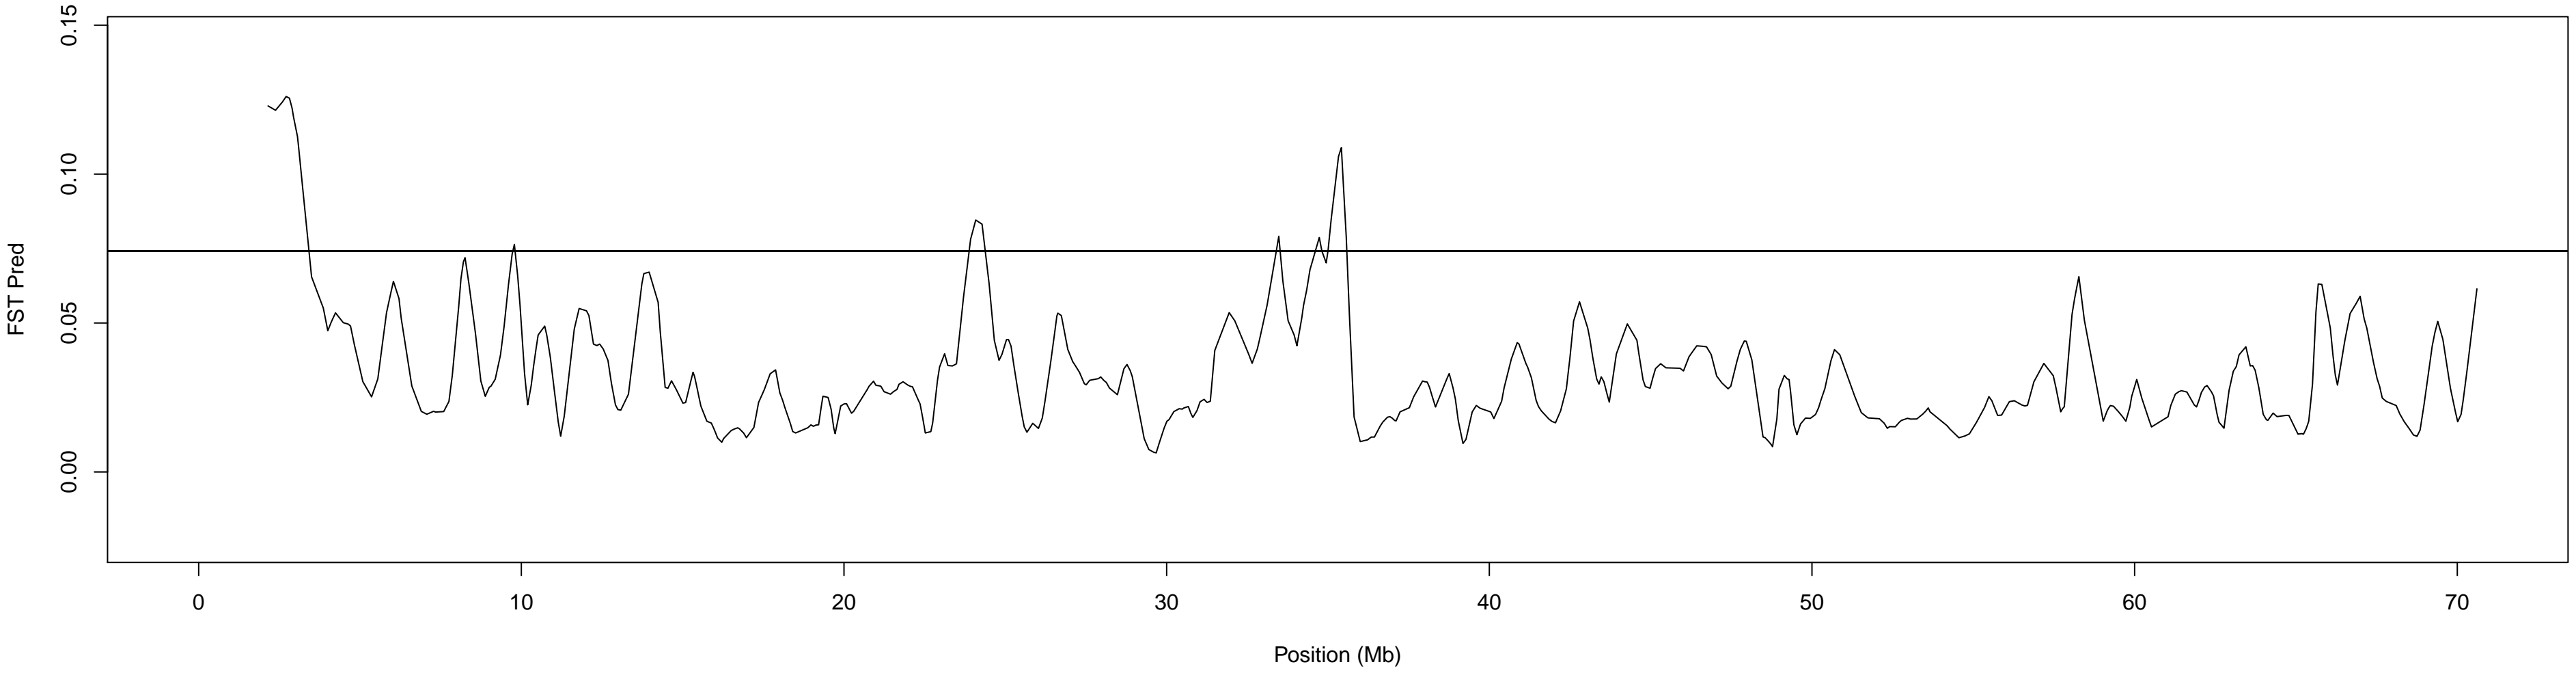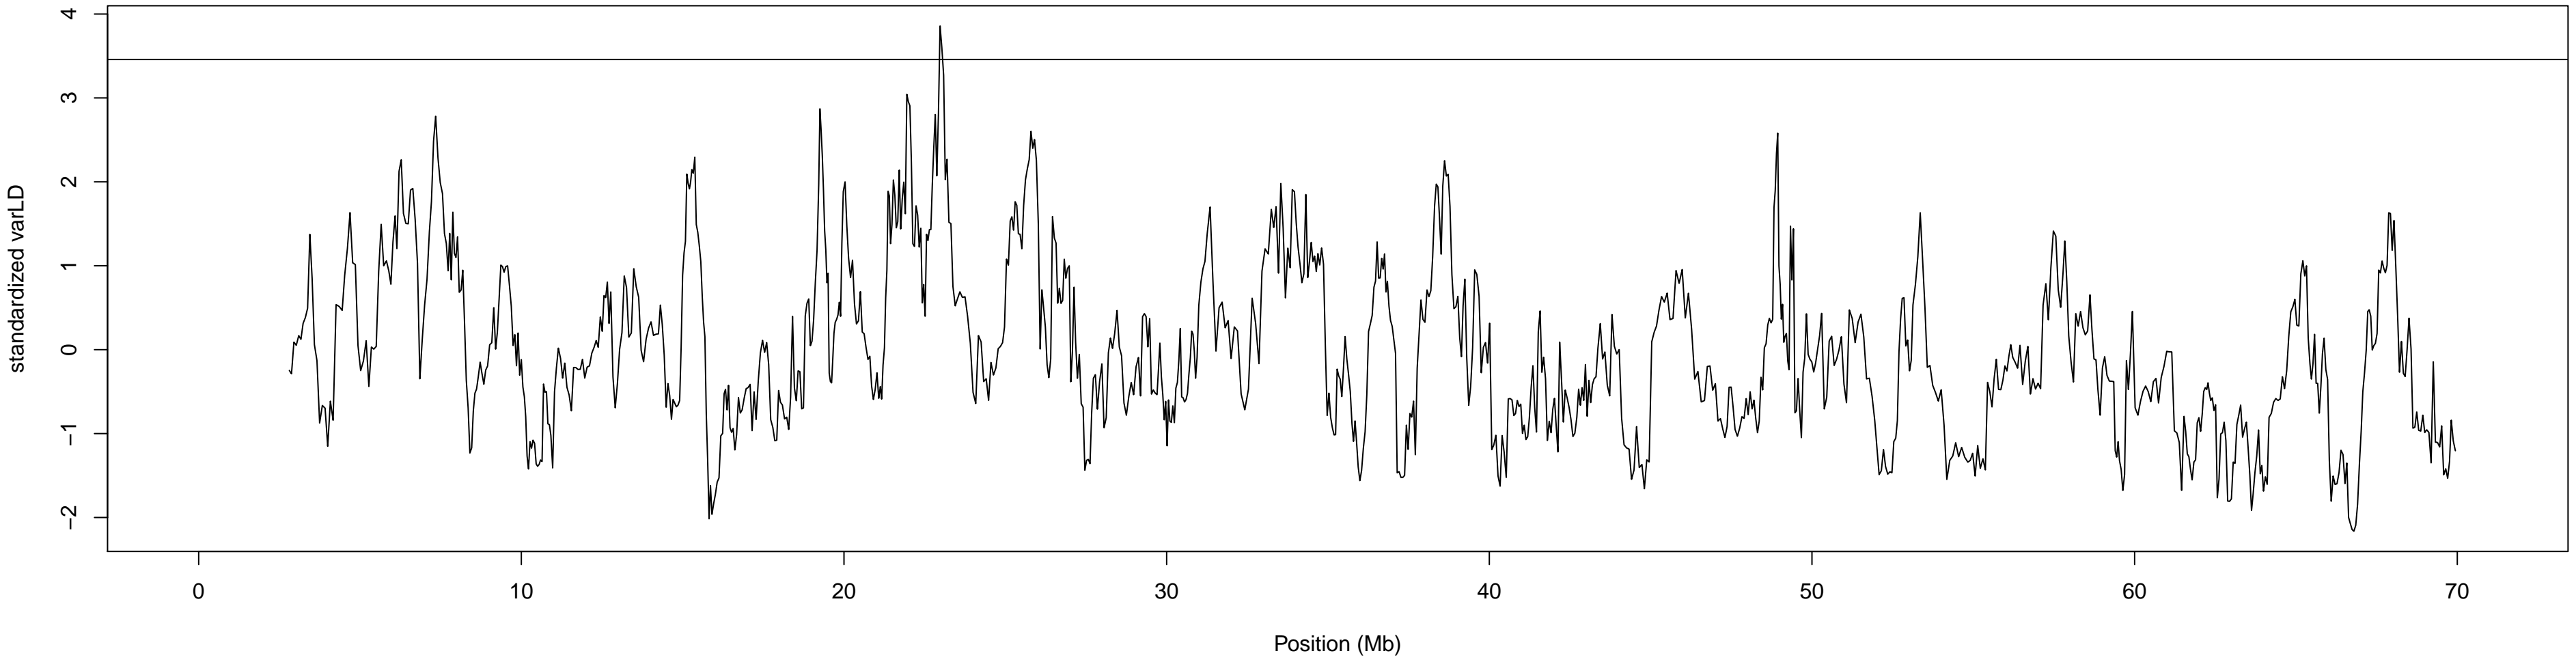

# FST VS varLD BTA 22

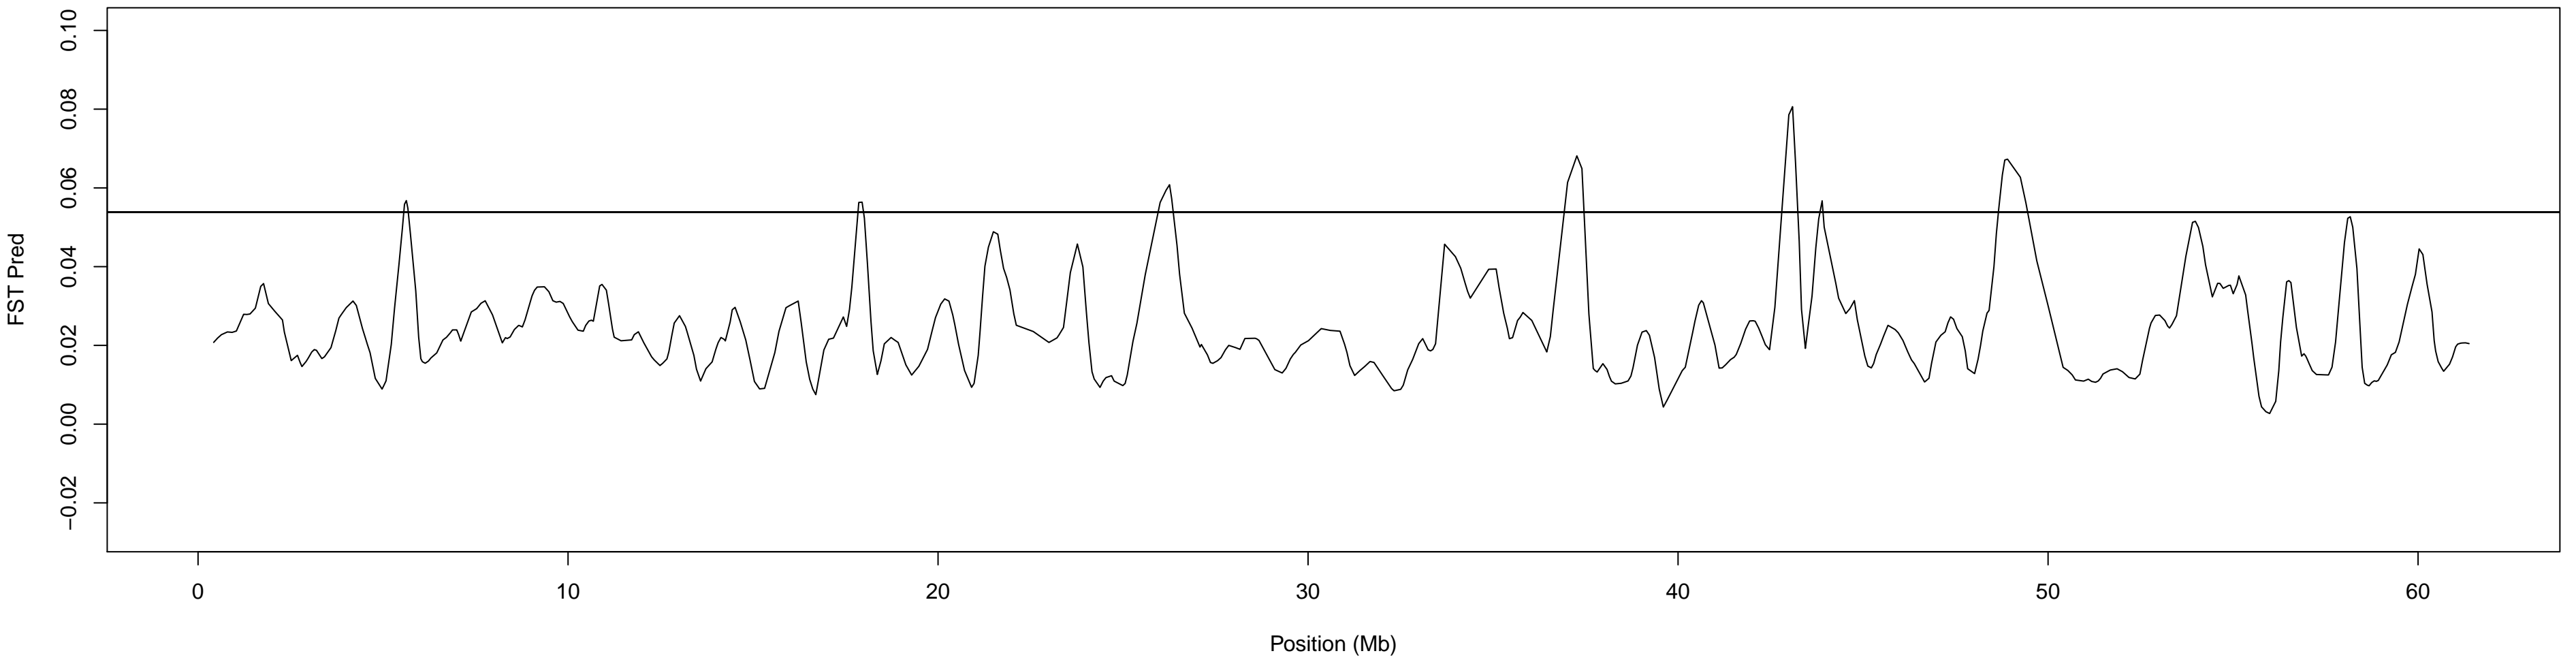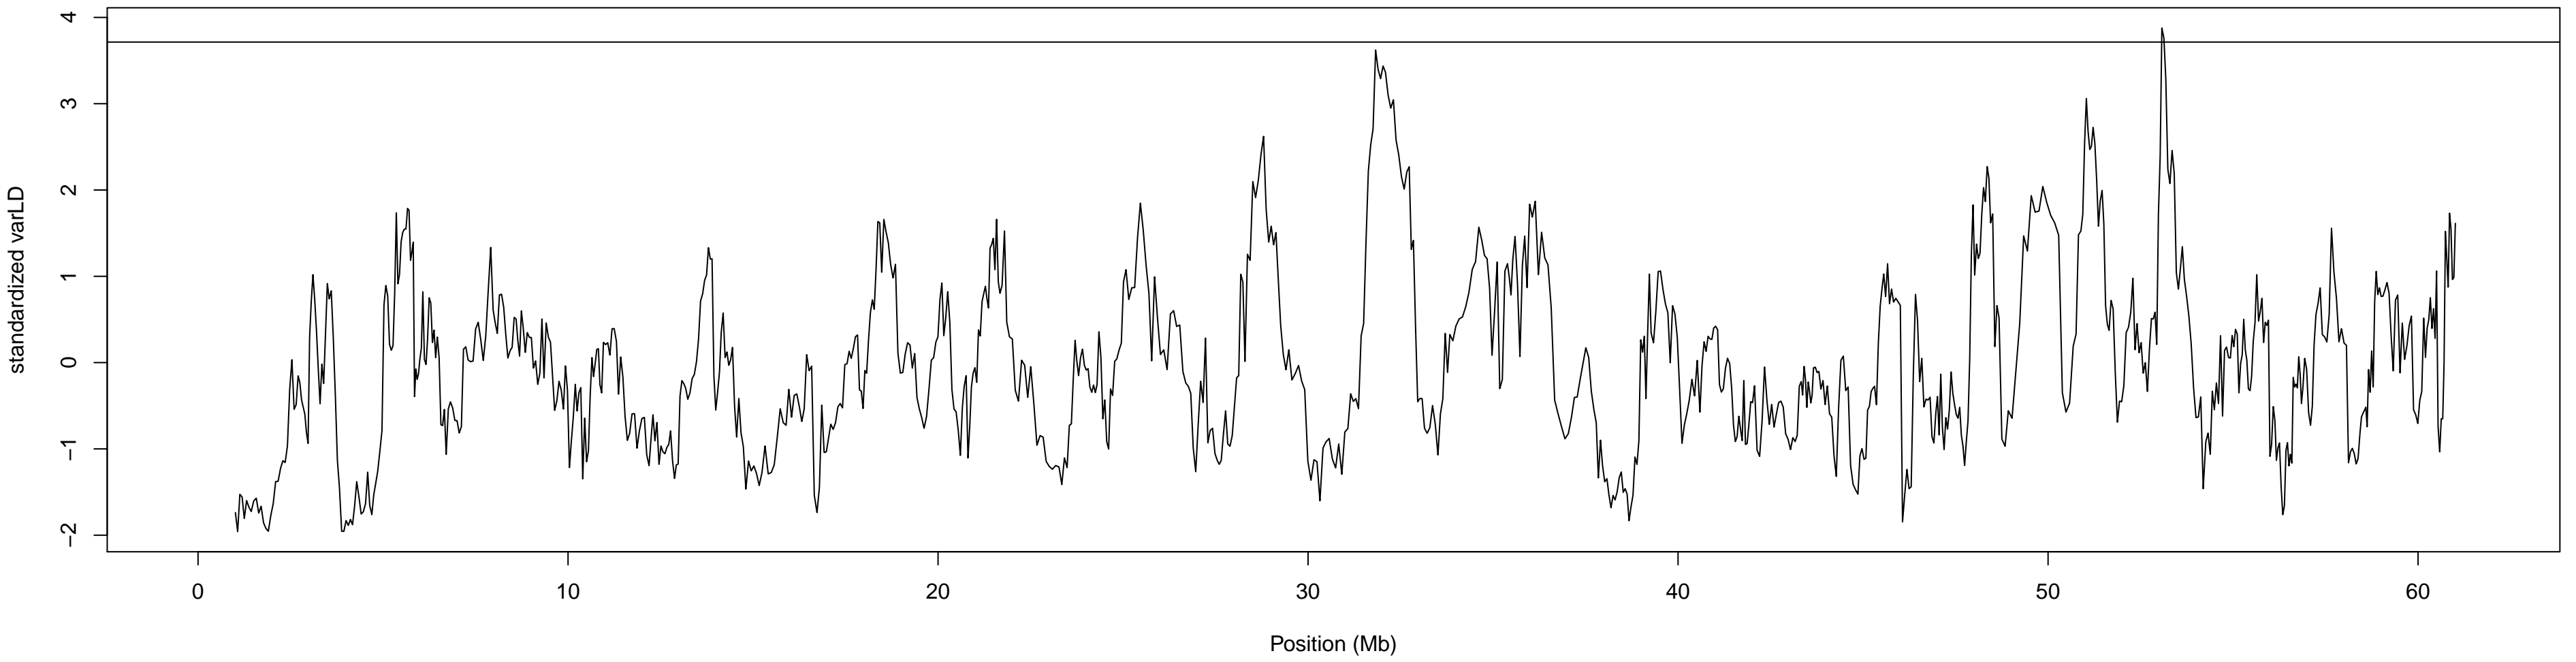

# FST VS varLD BTA 23

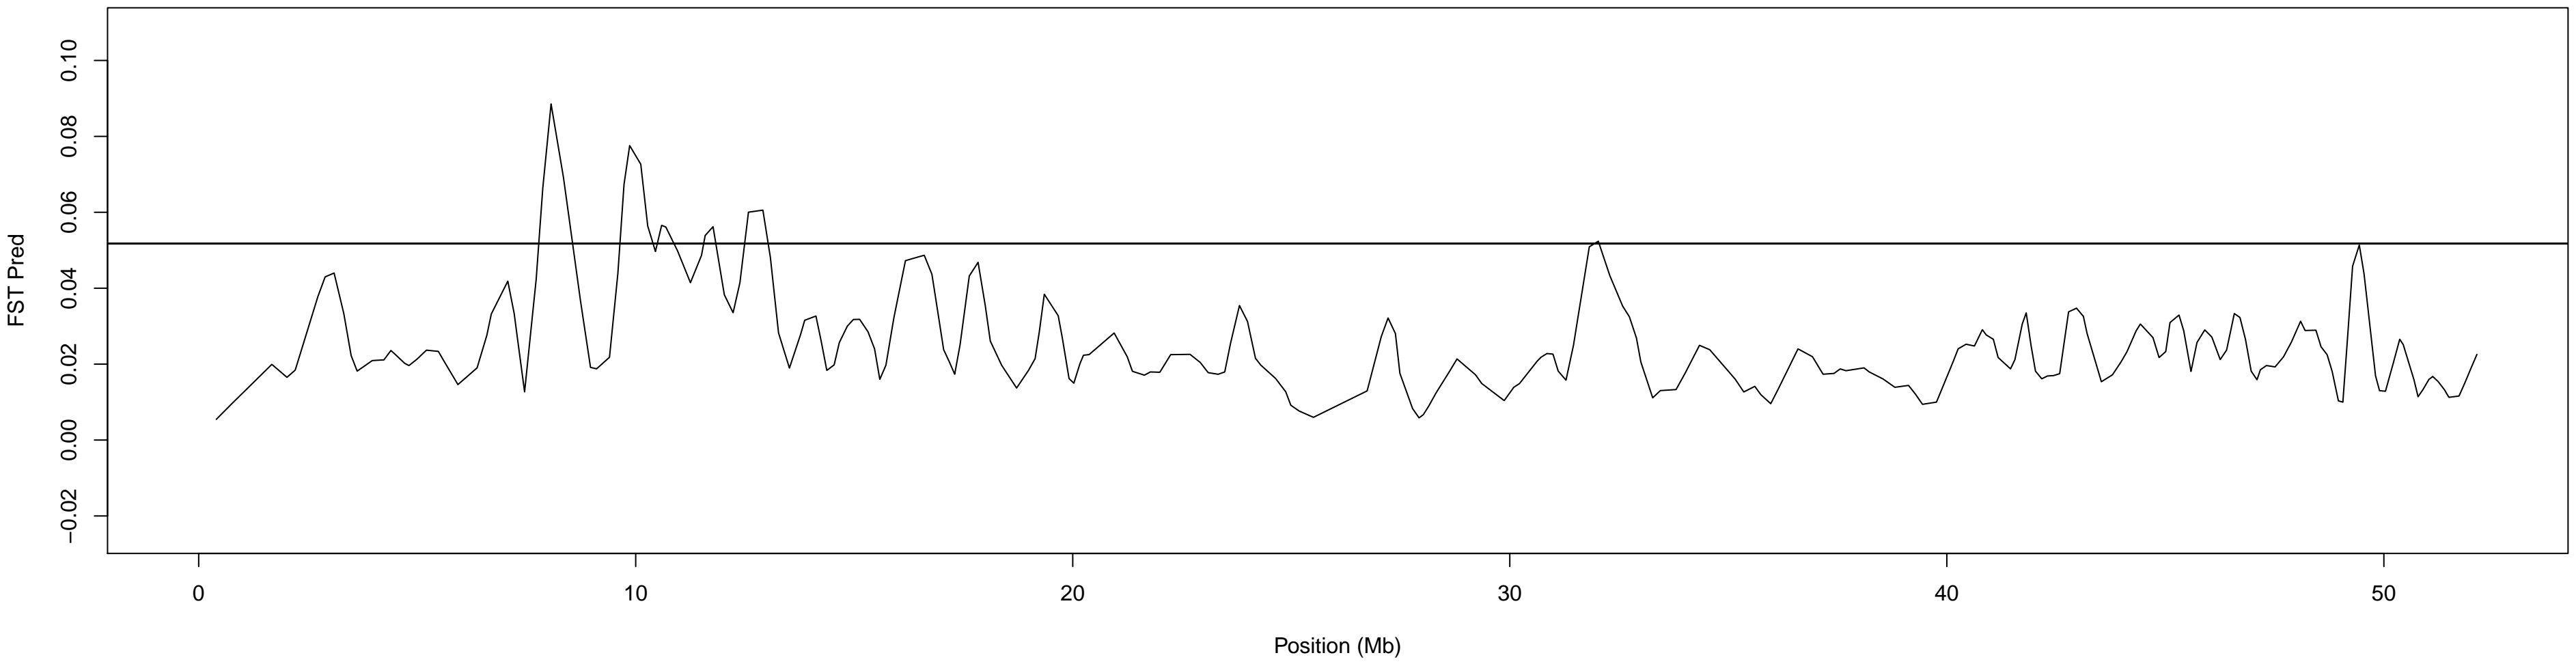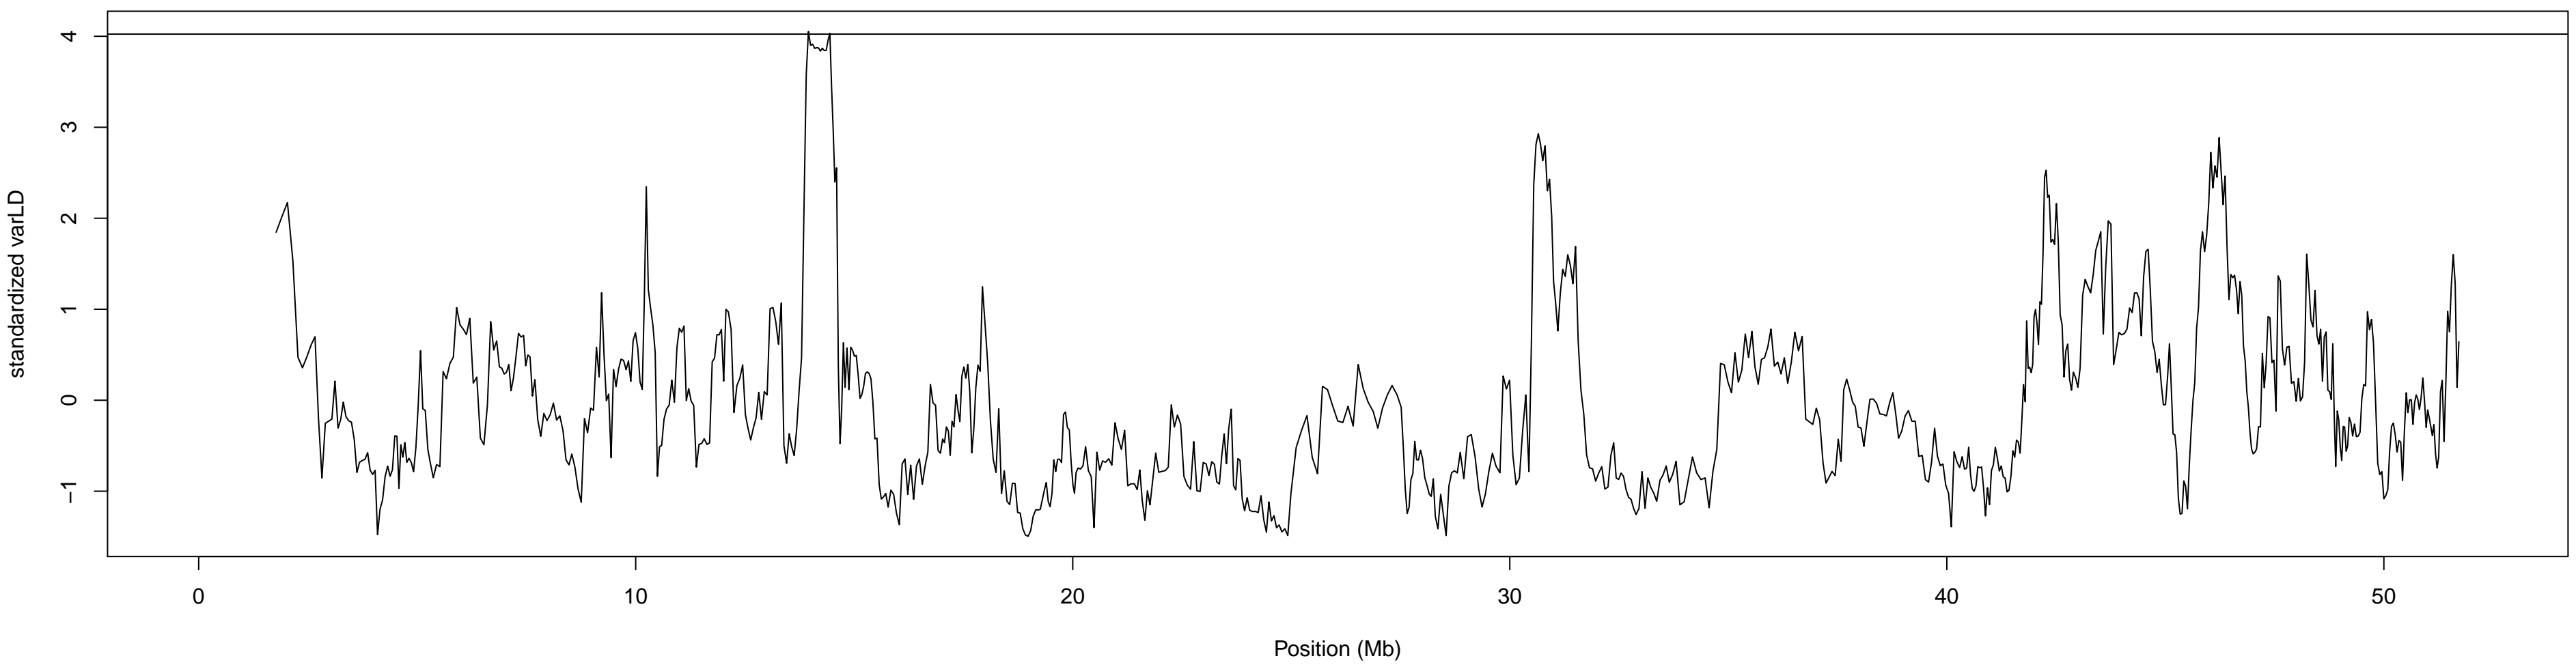

# FST VS varLD BTA 24

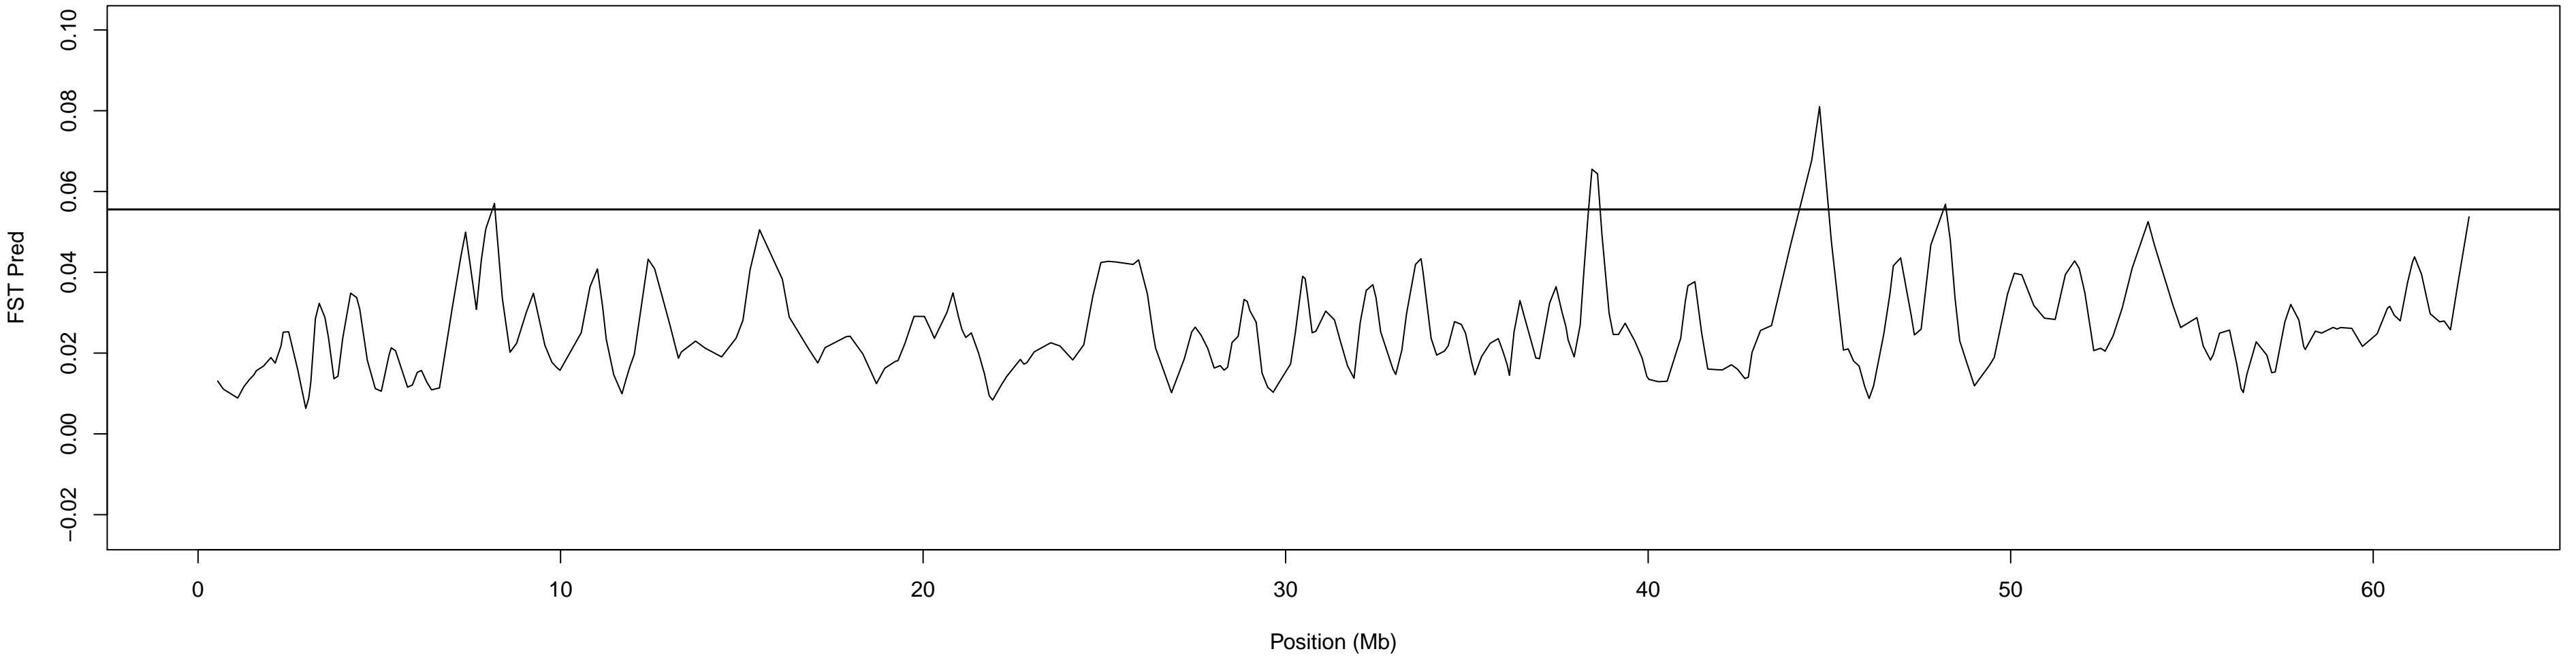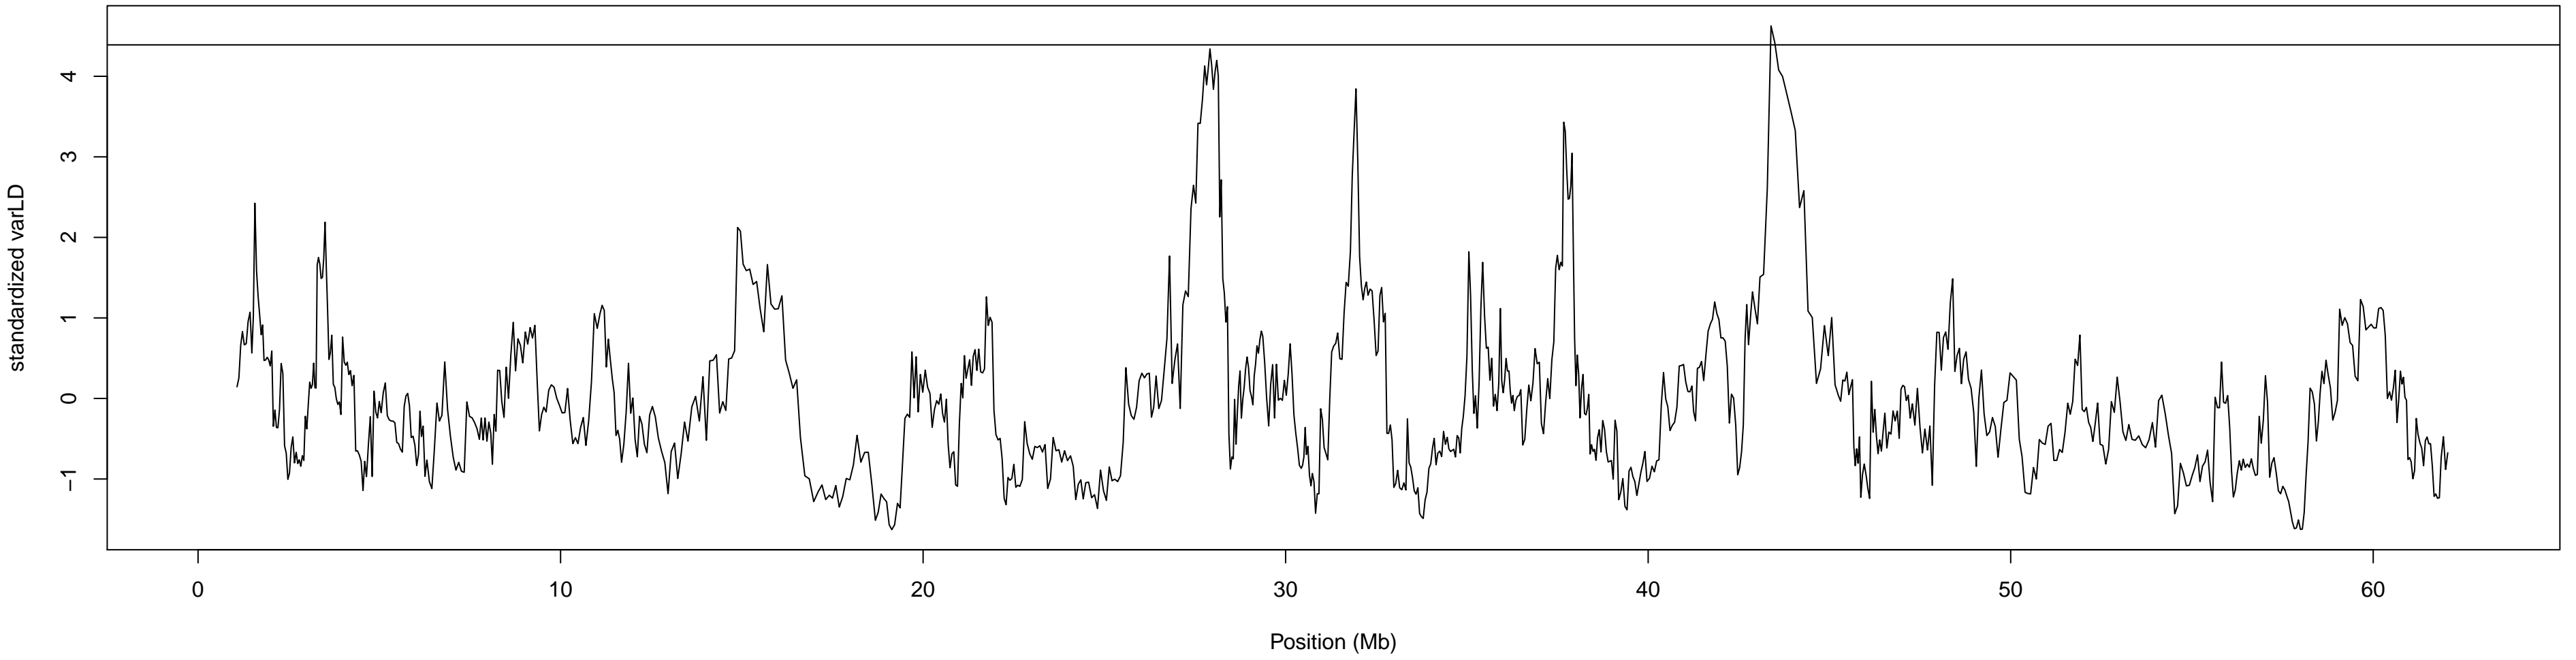



# FST VS varLD BTA 25

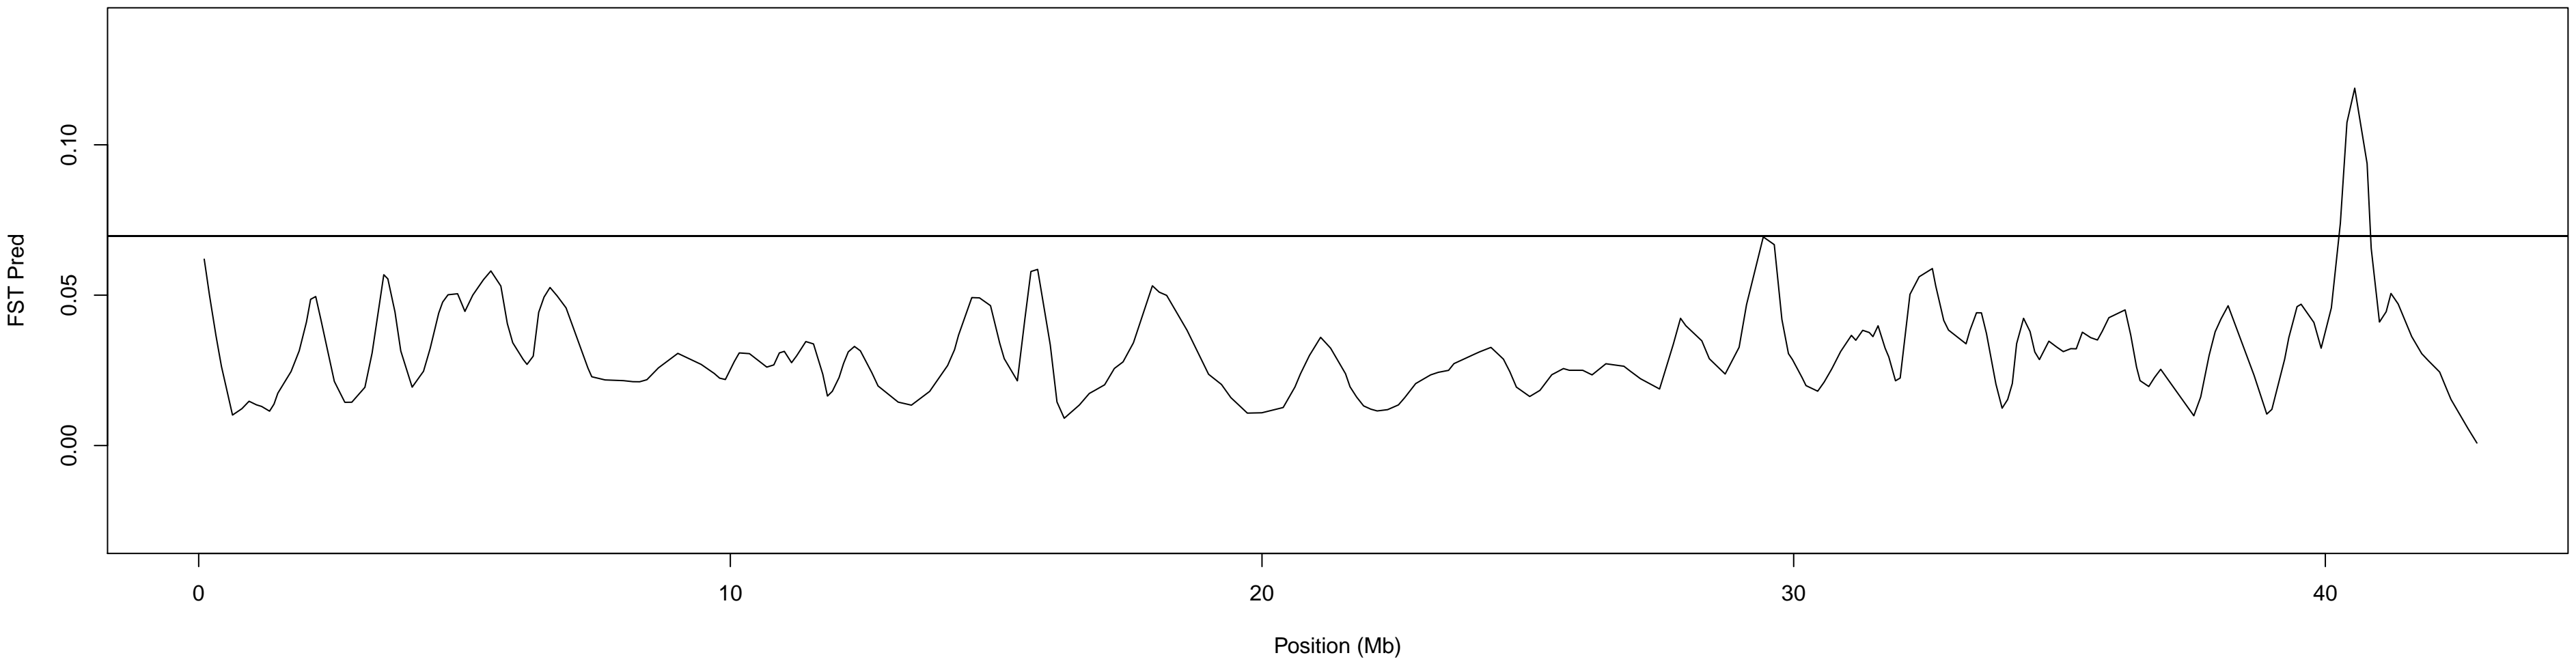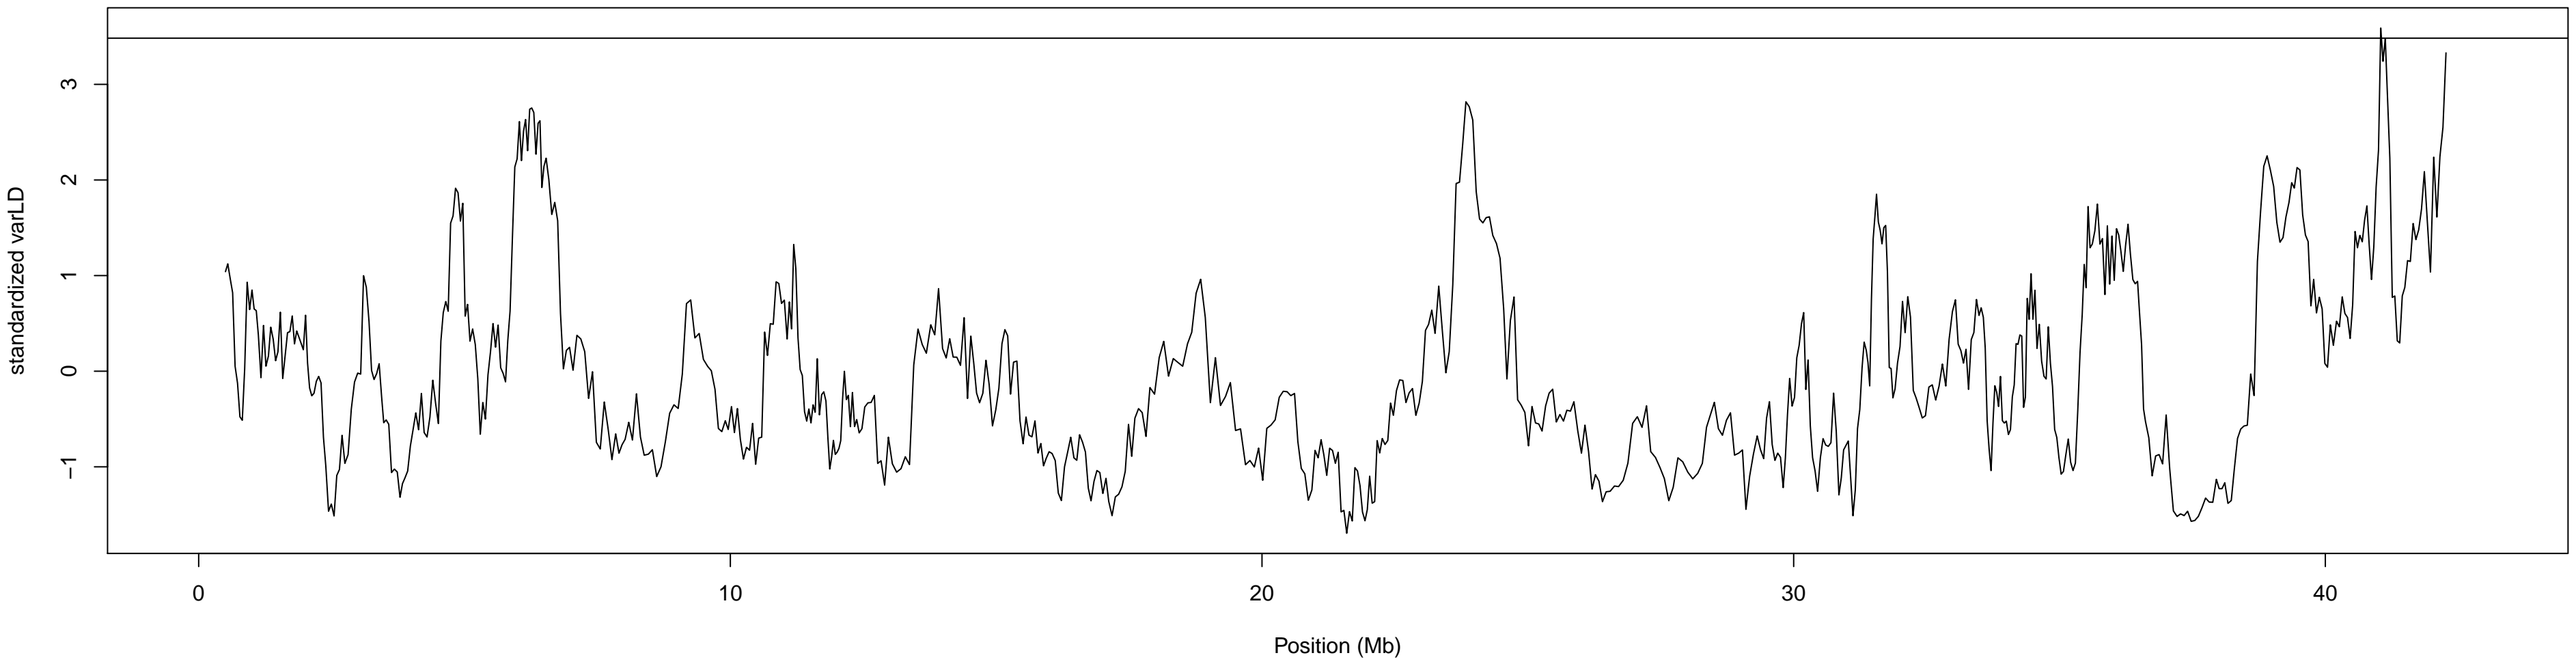

# FST VS varLD BTA 26

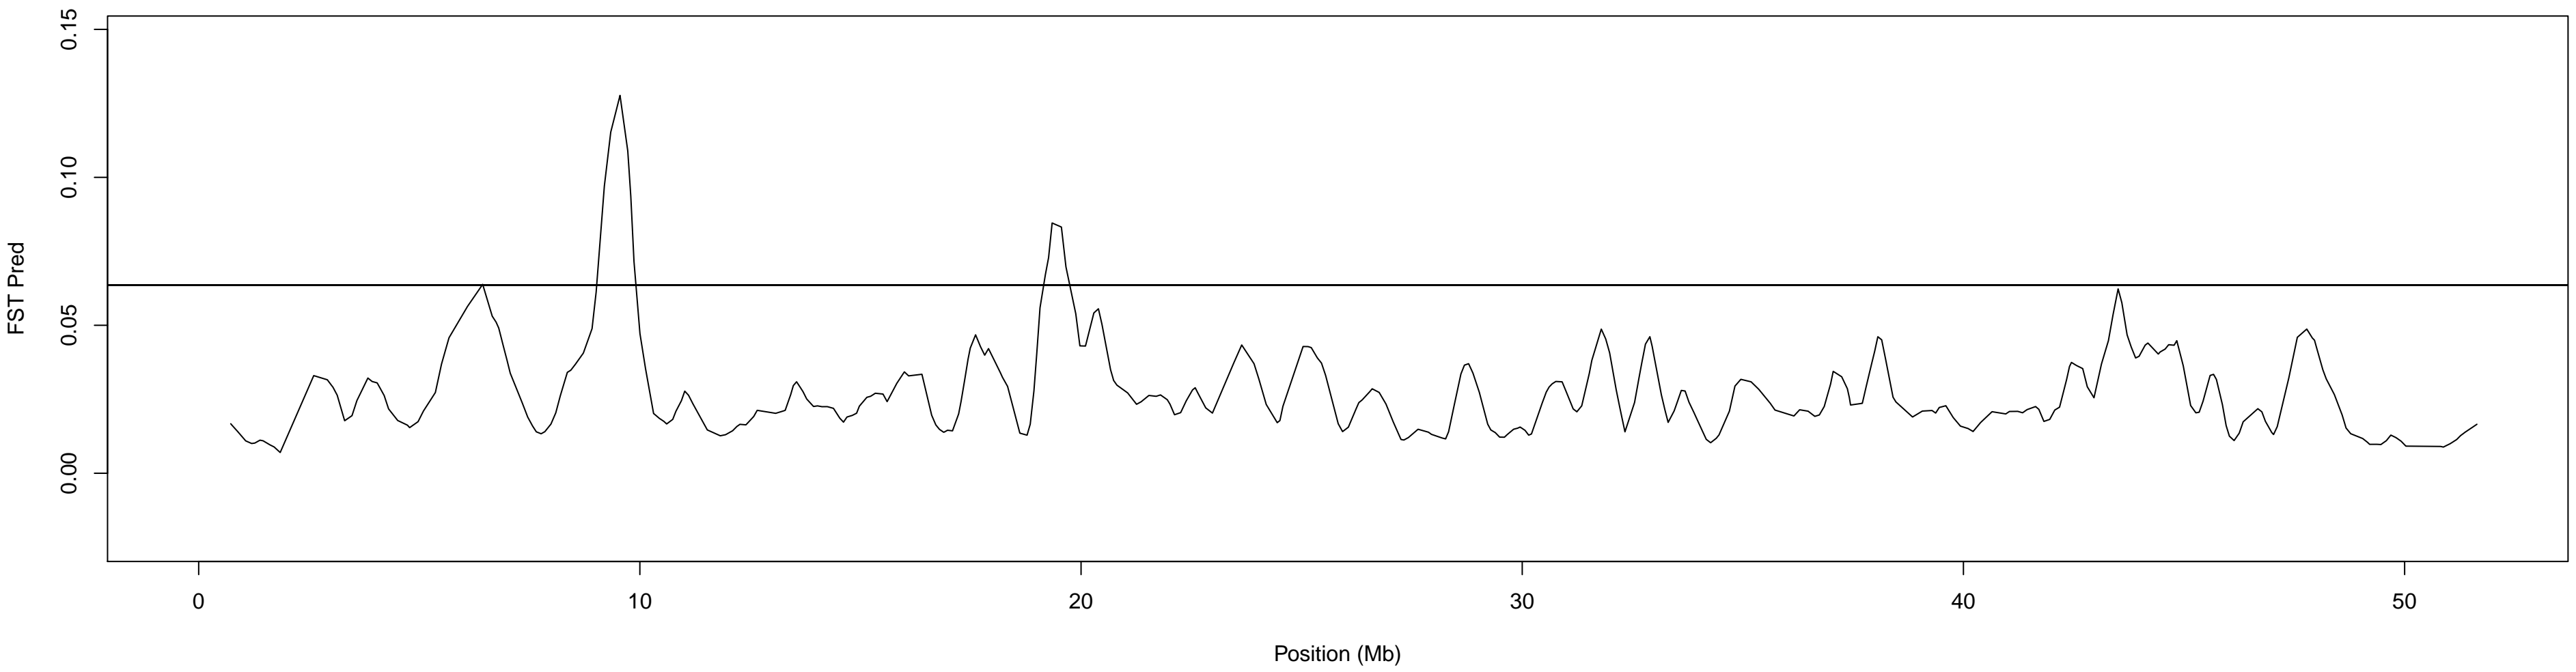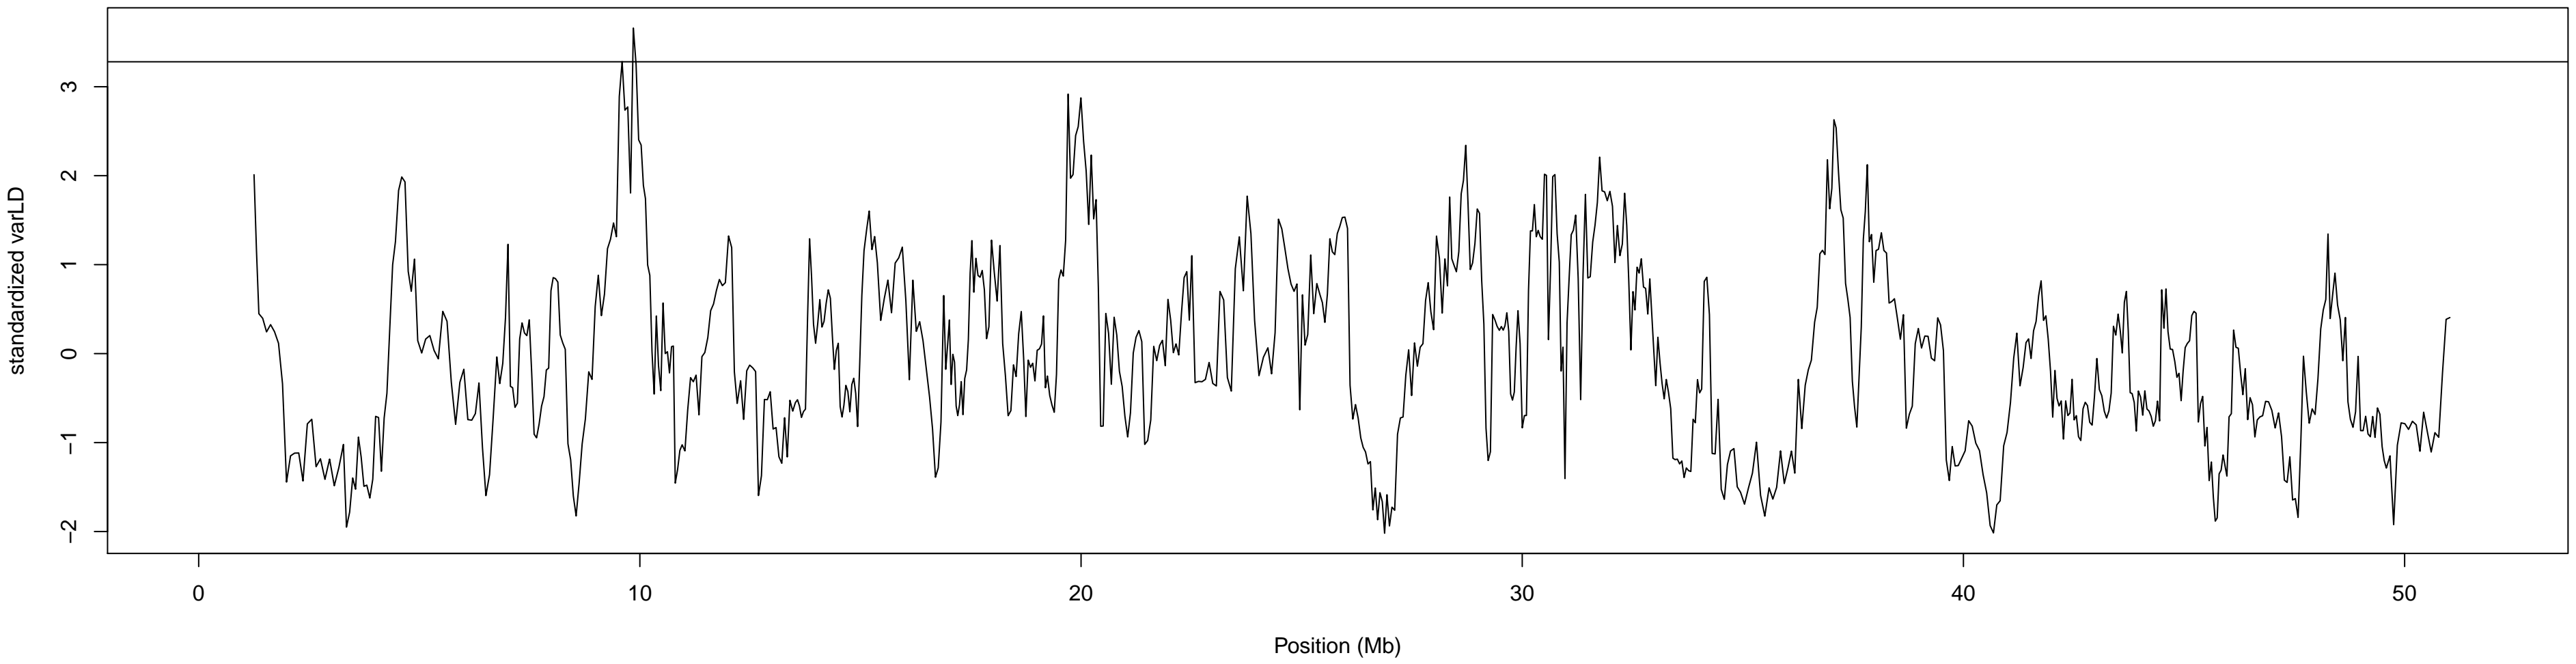

FST VS varLD BTA 27

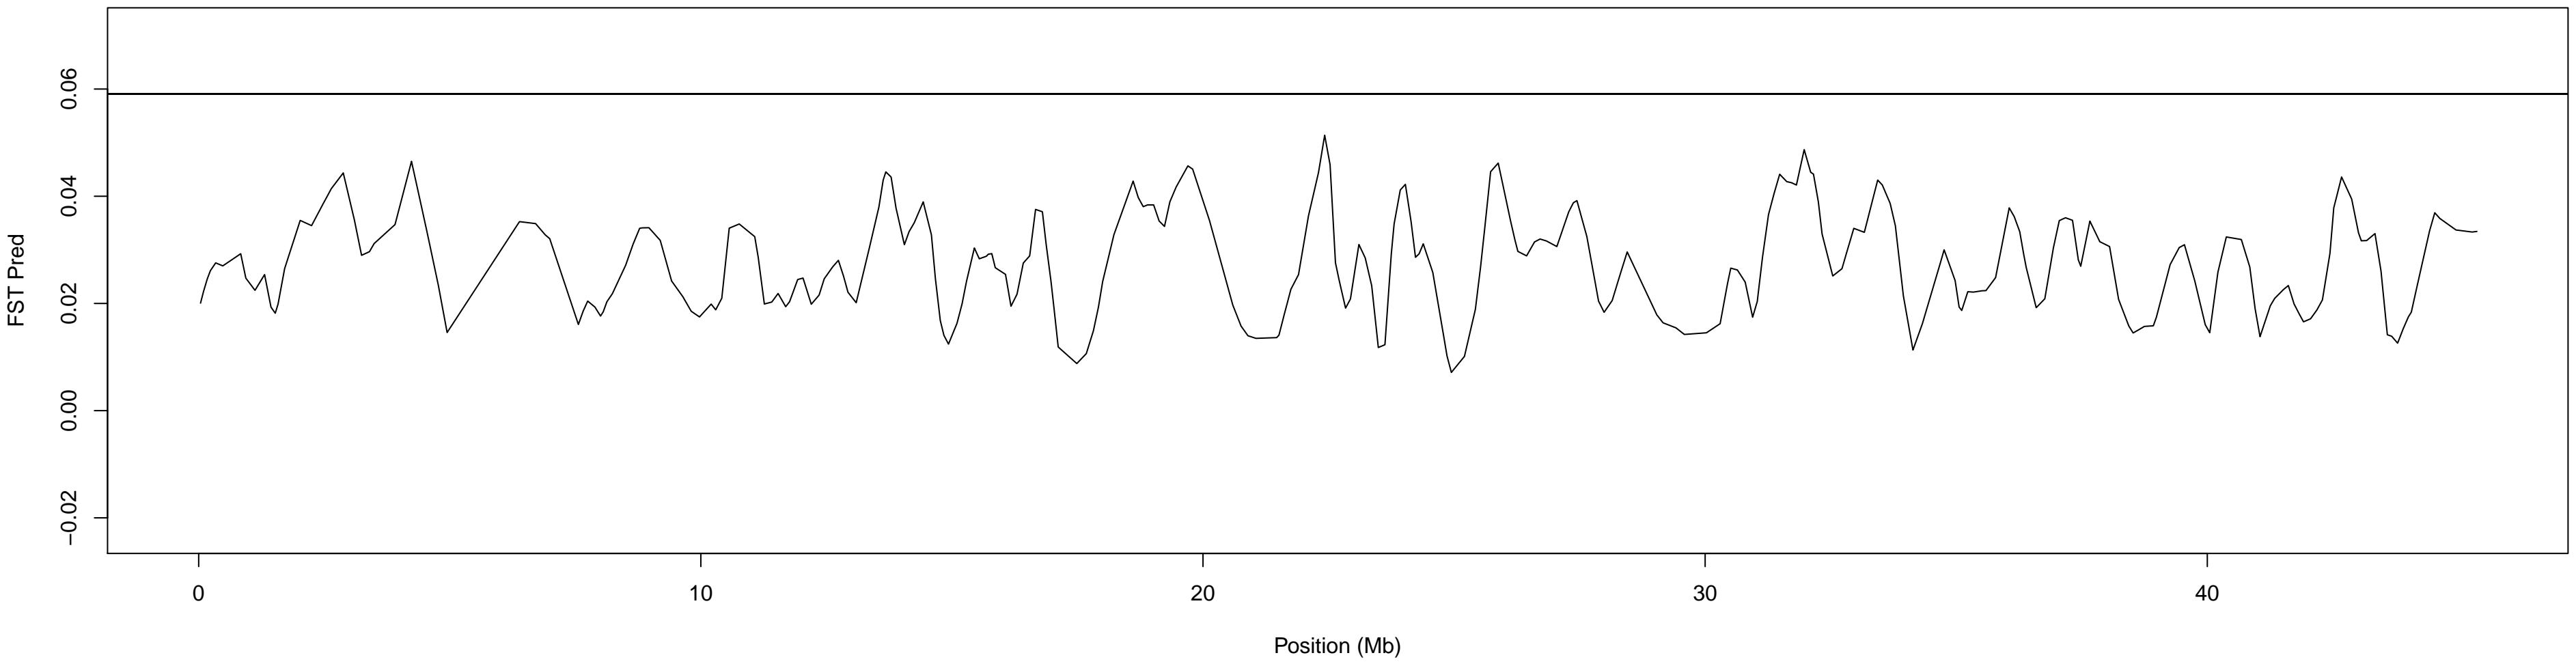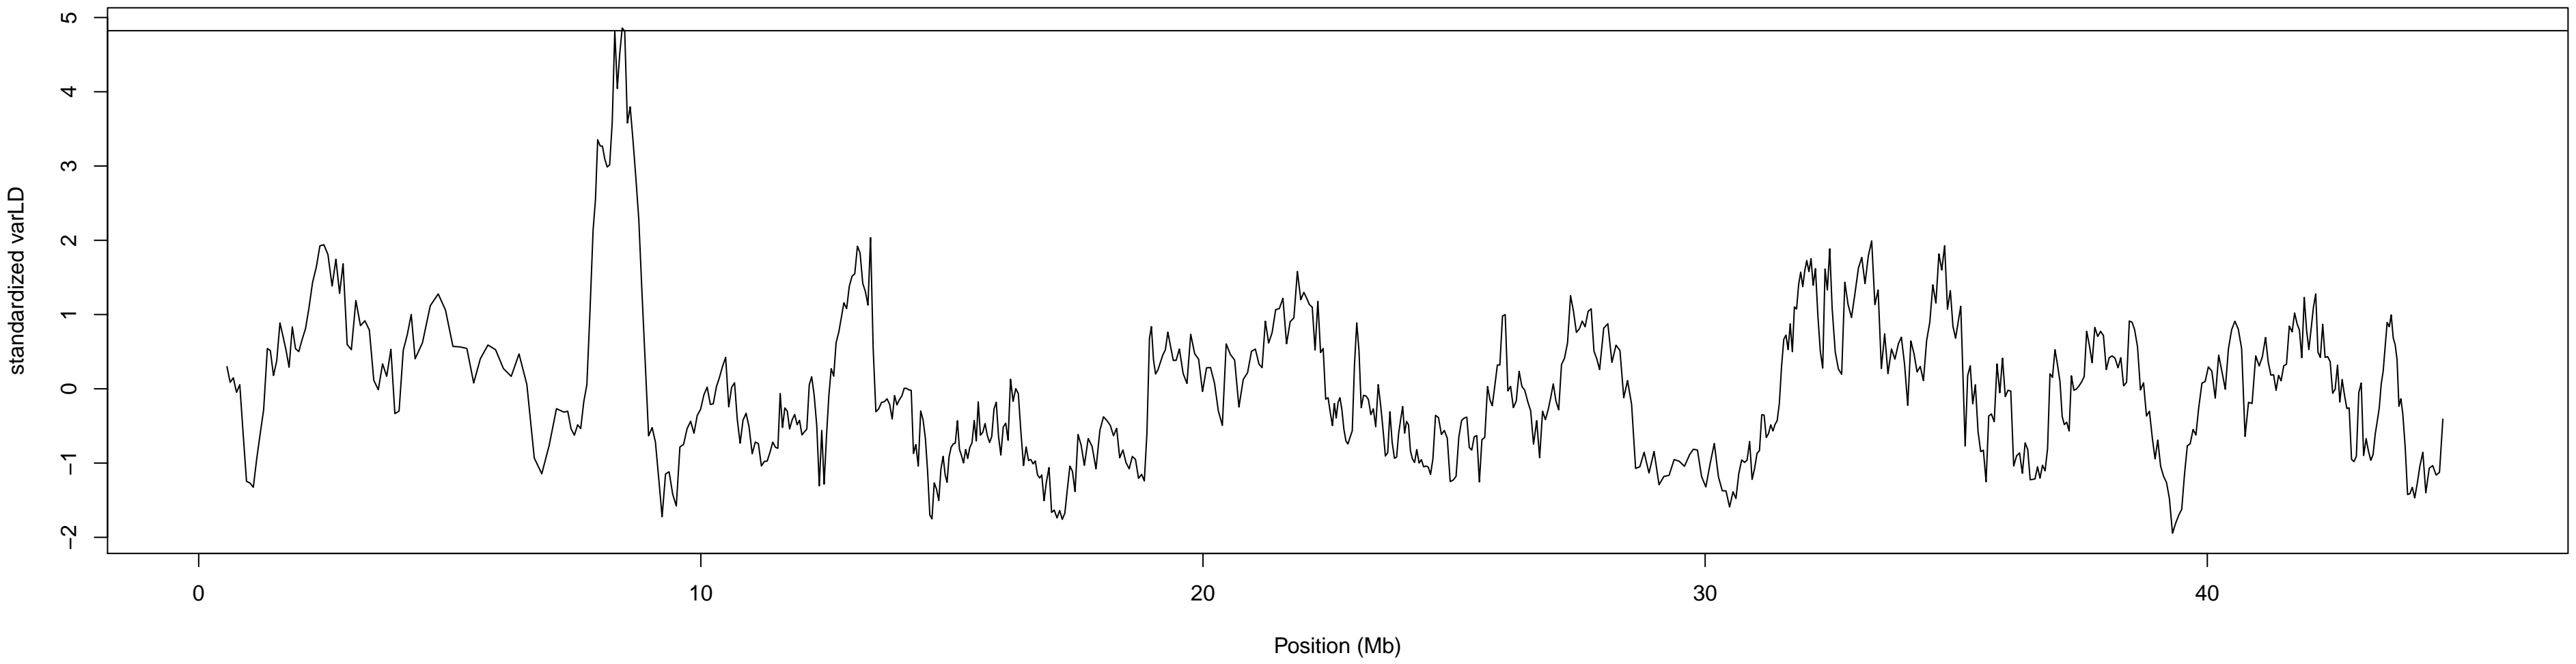

# FST VS varLD BTA 28

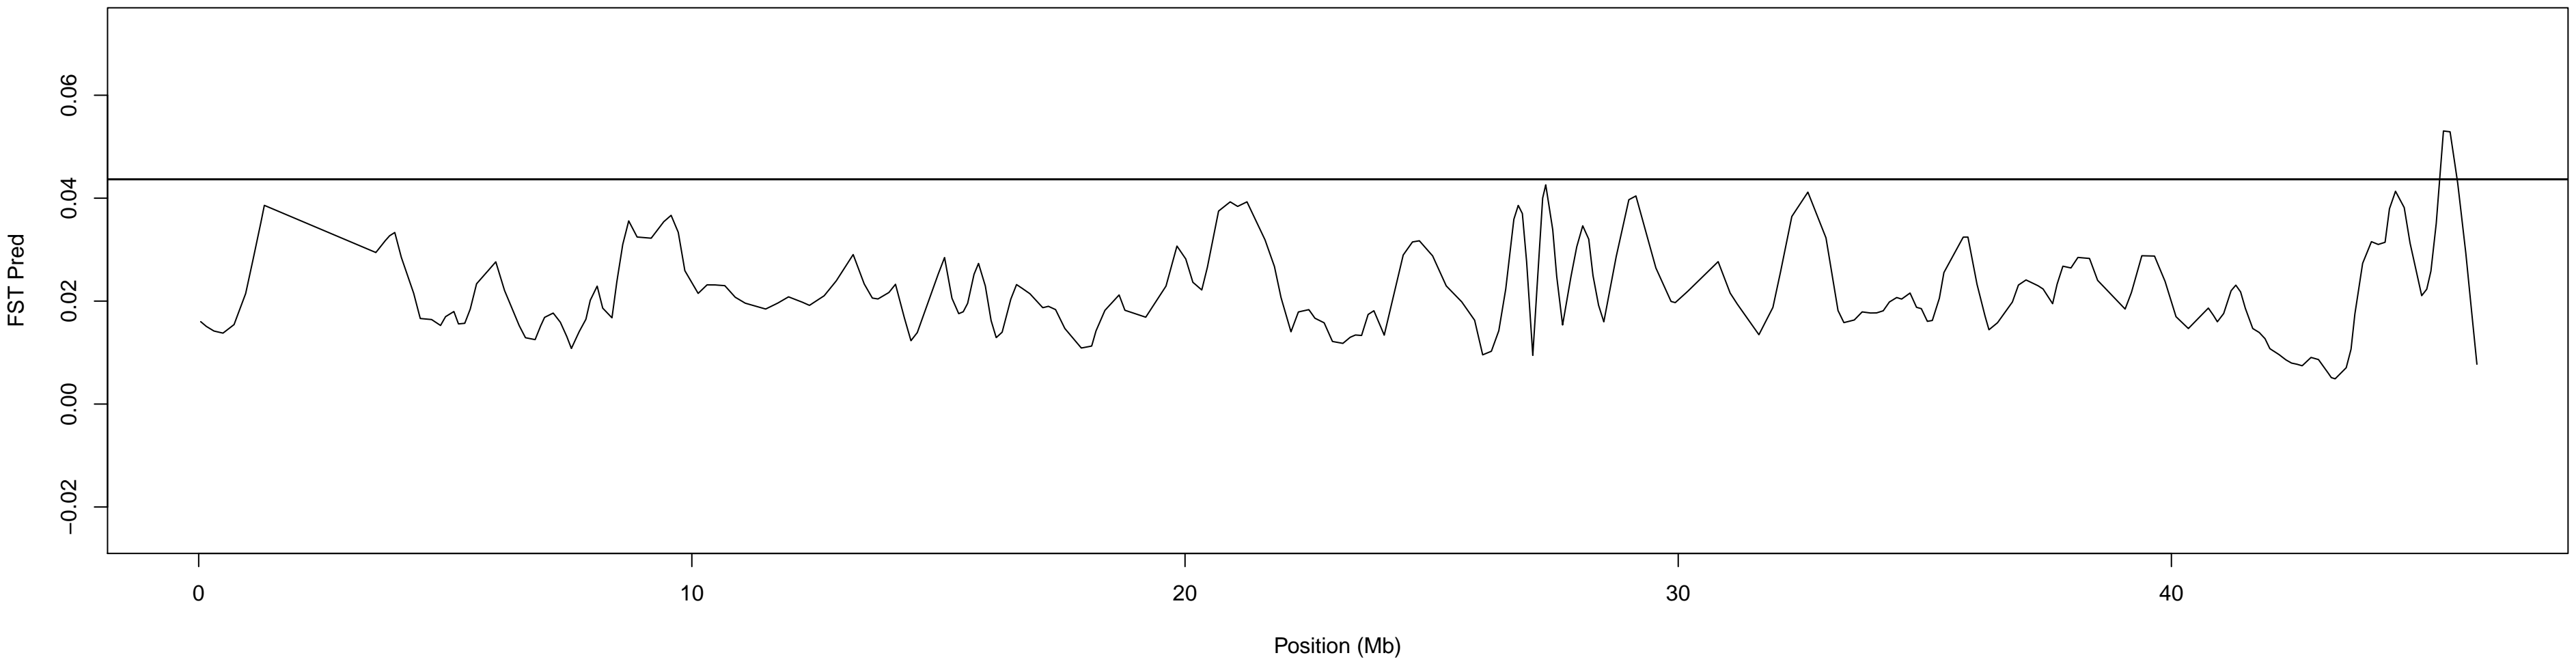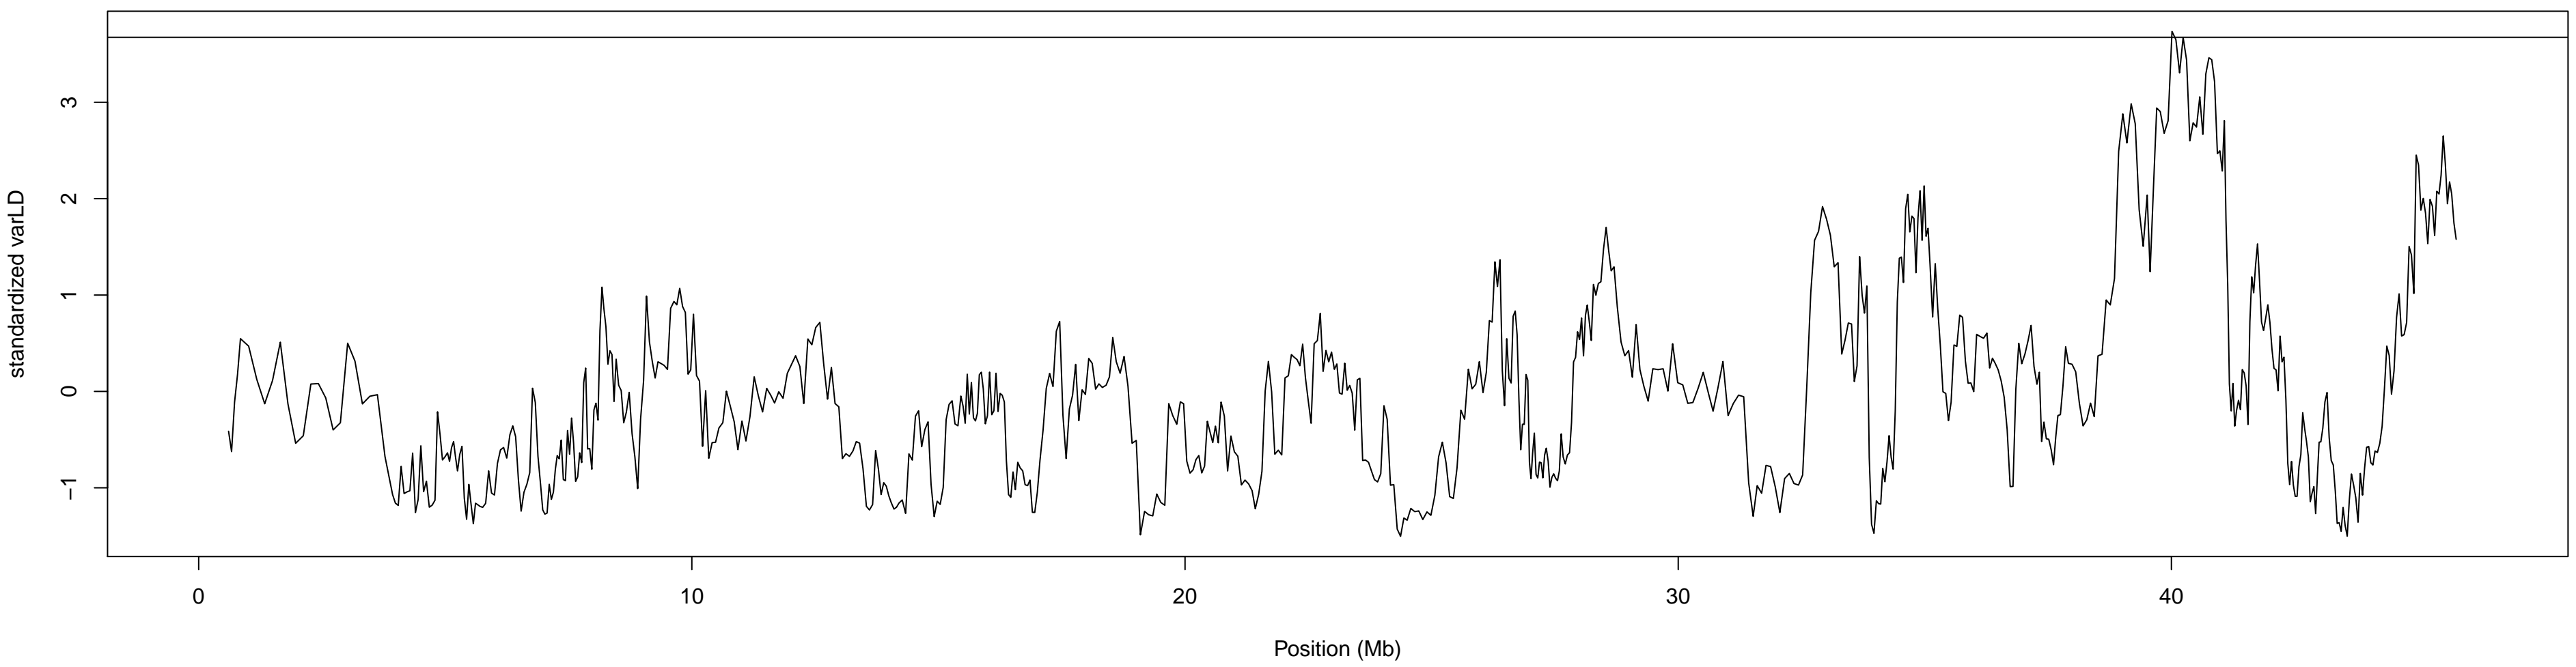

# FST VS varLD BTA 29

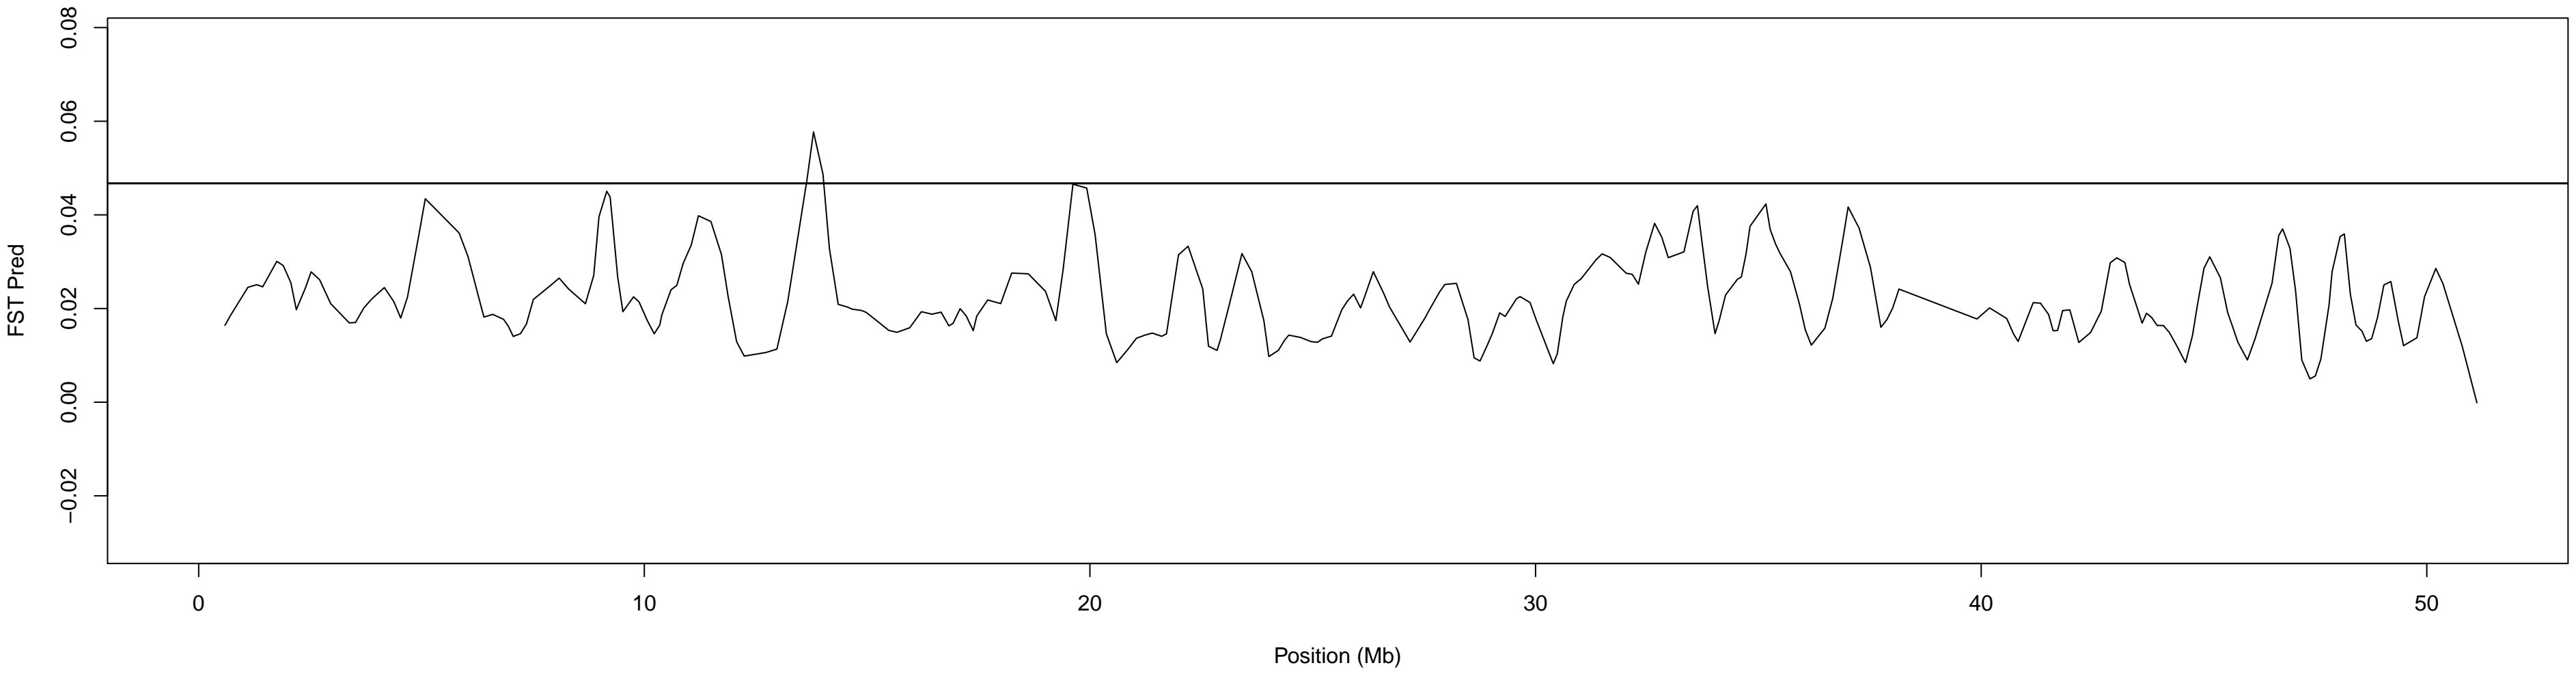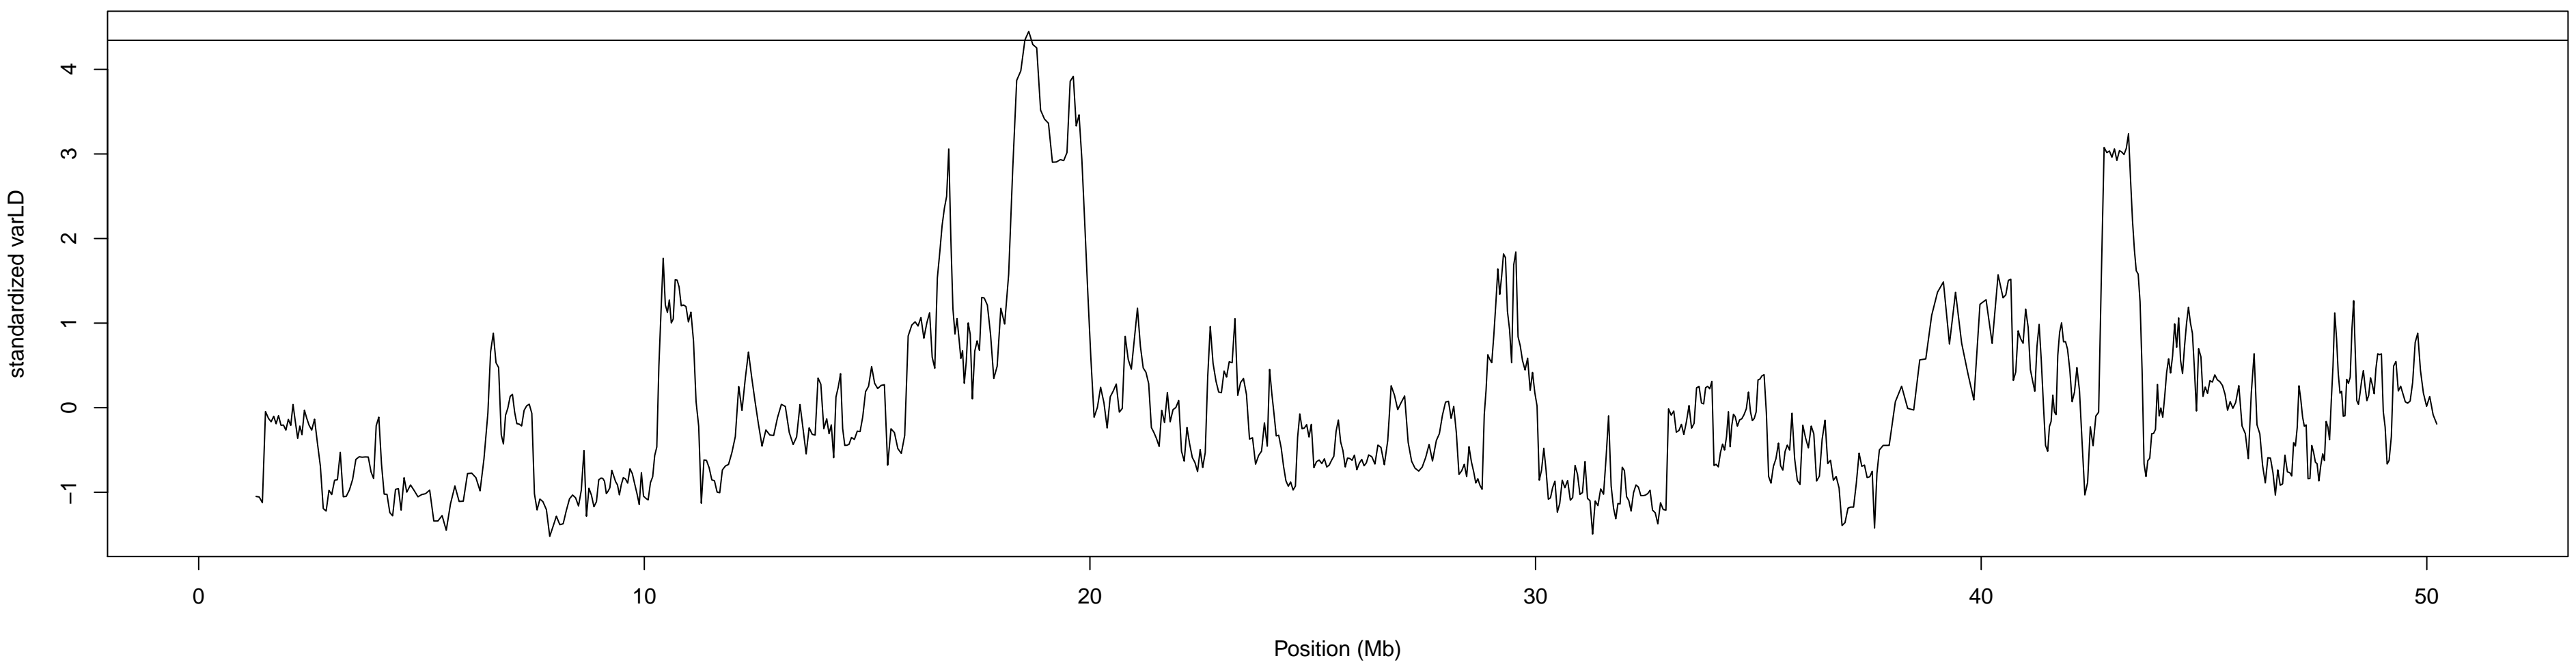

Supplement: 12711_2015_128_MOESM5_ESM.pdf [file 12711_2015_128_MOESM5_ESM.pdf]
