# Supplementary material for: Detection of selection signatures in Piemontese and Marchigiana cattle, two breeds with similar production aptitudes but different selection histories
Source: PubMed Central journal article supplement (PMC4476081; doi:10.1186/s12711-015-0128-2), 2015-06-23
Supplement: 12711_2015_128_MOESM1_ESM.pdf [file 12711_2015_128_MOESM1_ESM.pdf]

| BTA | Length<br>(bp) | SNP<br>number | Smoothing<br>parameter S | FST     |
|-----|----------------|---------------|--------------------------|---------|
| 1   | 158161585      | 2806          | 0,00713                  | 0,43503 |
| 2   | 136531159      | 2300          | 0,00870                  | 0,47124 |
| 3   | 121403393      | 2151          | 0,00930                  | 0,27933 |
| 4   | 120641946      | 2097          | 0,00954                  | 0,29346 |
| 5   | 119729902      | 1770          | 0,01130                  | 0,46225 |
| 6   | 119396337      | 2149          | 0,00931                  | 0,44806 |
| 7   | 112610067      | 1878          | 0,01065                  | 0,44509 |
| 8   | 113367096      | 1995          | 0,01003                  | 0,32658 |
| 9   | 105351459      | 1692          | 0,01182                  | 0,24532 |
| 10  | 104215086      | 1803          | 0,01109                  | 0,32622 |
| 11  | 107043330      | 1886          | 0,01060                  | 0,33668 |
| 12  | 91091598       | 1377          | 0,01452                  | 0,28642 |
| 13  | 84148909       | 1491          | 0,01341                  | 0,54780 |
| 14  | 84616190       | 1448          | 0,01381                  | 0,32498 |
| 15  | 85049720       | 1417          | 0,01411                  | 0,30955 |
| 16  | 80924801       | 1317          | 0,01519                  | 0,31732 |
| 17  | 74998349       | 1358          | 0,01473                  | 0,28150 |
| 18  | 65978584       | 1127          | 0,01775                  | 0,40787 |
| 19  | 64007021       | 1152          | 0,01736                  | 0,34630 |
| 20  | 71793734       | 1338          | 0,01495                  | 0,27074 |
| 21  | 70608408       | 1172          | 0,01706                  | 0,37591 |
| 22  | 61378199       | 1098          | 0,01821                  | 0,28489 |
| 23  | 52128894       | 910           | 0,02198                  | 0,26731 |
| 24  | 62643699       | 1082          | 0,01848                  | 0,27364 |
| 25  | 42851121       | 818           | 0,02445                  | 0,27863 |
| 26  | 51638650       | 890           | 0,02247                  | 0,25875 |
| 27  | 45368987       | 808           | 0,02475                  | 0,18559 |
| 28  | 46194755       | 797           | 0,02509                  | 0,17805 |
| 29  | 51124356       | 882           | 0,02268                  | 0,19822 |
