# Supplementary material for: Detection of selection signatures in Piemontese and Marchigiana cattle, two breeds with similar production aptitudes but different selection histories
Source: PubMed Central journal article supplement (PMC4476081; doi:10.1186/s12711-015-0128-2), 2015-06-23
Supplement: 12711_2015_128_MOESM4_ESM.pdf [file 12711_2015_128_MOESM4_ESM.pdf]

## Sheet1

| <b>Gene name</b> | <b>start bp</b> | <b>end bp</b> | <b>BTA</b> |
|------------------|-----------------|---------------|------------|
| NAB1             | 5567015         | 5603683       | 2          |
| INPP1            | 5867811         | 5903148       | 2          |
| C2H2orf88        | 6038401         | 6113008       | 2          |
| NGF              | 28124614        | 28125504      | 3          |
| TSPAN2           | 28364795        | 28449607      | 3          |
| TSHB             | 28419562        | 28424798      | 3          |
| ZNF800           | 92423261        | 92444888      | 4          |
| GRM8             | 91470675        | 92316363      | 4          |
| MIR592           | 92126803        | 92126899      | 4          |
| RBFOX2           | 74255691        | 74544965      | 5          |
| LOC515697        | 74673522        | 74688915      | 5          |
| RBFOX2           | 74255691        | 74544965      | 5          |
| LOC515697        | 74673522        | 74688915      | 5          |
| LOC510193        | 74935712        | 74959664      | 5          |
| APOL3_AA         | 74974806        | 74986756      | 5          |
| PKD2             | 38040870        | 38099549      | 6          |
| SPP1             | 38120577        | 38127541      | 6          |
| HERC6            | 37736137        | 37793279      | 6          |
| PPM1K            | 37876469        | 37898525      | 6          |
| ABCG2            | 37959535        | 38030586      | 6          |
| HERC5            | 37683705        | 37728602      | 6          |
| IBSP             | 38309554        | 38323303      | 6          |
| MEPE             | 38279590        | 38293661      | 6          |
| FEM1A            | 20565298        | 20568880      | 7          |
| ARRDC5           | 20473897        | 20486896      | 7          |
| MIR7-3           | 20584156        | 20584238      | 7          |
| TNFAIP8L1        | 20697556        | 20716655      | 7          |
| UBXN6            | 20879419        | 20891487      | 7          |
| HDGFRP2          | 20843765        | 20861798      | 7          |
| TICAM1           | 20547954        | 20550264      | 7          |
| FSD1             | 20979097        | 20990894      | 7          |
| CHAF1A           | 20893519        | 20918558      | 7          |
| PLIN5            | 20816180        | 20827918      | 7          |
| PLIN3            | 20503791        | 20524337      | 7          |
| LRG1             | 20812033        | 20814992      | 7          |
| C7H19orf10       | 20683773        | 20695706      | 7          |
| STAP2            | 20966850        | 20978543      | 7          |
| SH3GL1           | 20923761        | 20951051      | 7          |
| SHD              | 21002489        | 21010652      | 7          |
| CCDC94           | 21017251        | 21031250      | 7          |
| TNFAIP8L1        | 20697556        | 20716655      | 7          |
| UBXN6            | 20879419        | 20891487      | 7          |
| HDGFRP2          | 20843765        | 20861798      | 7          |
| SIRT6            | 21079143        | 21087378      | 7          |
| CREB3L3          | 21088128        | 21099619      | 7          |
| EBI3             | 21033473        | 21040668      | 7          |
| PIAS4            | 21204179        | 21227471      | 7          |

Sheet1

|            |          |          |    |
|------------|----------|----------|----|
| ZBTB7A     | 21179395 | 21196337 | 7  |
| MAP2K2     | 21132388 | 21153987 | 7  |
| LDHAL6B    | 95367660 | 95368977 | 9  |
| TMEM242    | 95353541 | 95394421 | 9  |
| MIR2481    | 95289914 | 95289978 | 9  |
| ZDHHC14    | 95439712 | 95744856 | 9  |
| CHRM5      | 28577030 | 28578629 | 10 |
| EMC7       | 28548985 | 28564465 | 10 |
| CCT4       | 60397413 | 60410035 | 11 |
| XPO1       | 60068220 | 60109922 | 11 |
| COMMD1     | 60427664 | 60598439 | 11 |
| B3GNT2     | 60654633 | 60687732 | 11 |
| CCT4       | 60397413 | 60410035 | 11 |
| RNF219     | 54102933 | 54147844 | 12 |
| CDK5RAP1   | 63368940 | 63403771 | 13 |
| BPIFA2C    | 63086221 | 63095440 | 13 |
| BPIFA2B    | 63165305 | 63175676 | 13 |
| BPIFA3     | 63227592 | 63239140 | 13 |
| BPIFA1     | 63247710 | 63254775 | 13 |
| BPIFA2A    | 63041966 | 63053506 | 13 |
| SNTA1      | 63408785 | 63490256 | 13 |
| BPIFB5     | 63311350 | 63329709 | 13 |
| BPIFB1     | 63284372 | 63305522 | 13 |
| CHMP4B     | 63817039 | 63849783 | 13 |
| E2F1       | 63704816 | 63714008 | 13 |
| ZNF341     | 63750179 | 63790156 | 13 |
| PXMP4      | 63726541 | 63743492 | 13 |
| NECAB3     | 63684234 | 63703230 | 13 |
| ARRB1      | 55255744 | 55329451 | 15 |
| XRR1       | 54931231 | 54968552 | 15 |
| CHRD1      | 54785593 | 54819151 | 15 |
| NEU3       | 55029089 | 55043623 | 15 |
| SLCO2B1    | 55151084 | 55203574 | 15 |
| RPS3       | 55370366 | 55375312 | 15 |
| MIR326     | 55314008 | 55314103 | 15 |
| PARK7      | 46249162 | 46265920 | 16 |
| ERRFI1     | 46201191 | 46215456 | 16 |
| VAMP3      | 46455175 | 46464710 | 16 |
| TNFRSF9    | 46288365 | 46306440 | 16 |
| C16H1orf74 | 75421210 | 75423469 | 16 |
| LAMB3      | 75567713 | 75610921 | 16 |
| GOS2       | 75539495 | 75540404 | 16 |
| IRF6       | 75401220 | 75417467 | 16 |
| MIR205     | 75799965 | 75800034 | 16 |
| TRAF3IP3   | 75426163 | 75446749 | 16 |
| CAMK1G     | 75611810 | 75642910 | 16 |
| HSD11B1    | 75463611 | 75508770 | 16 |
| DIEXF      | 75346249 | 75373188 | 16 |

## Sheet1

|             |          |          |    |
|-------------|----------|----------|----|
| RNF10       | 65067804 | 65101420 | 17 |
| SRSF9       | 65008116 | 65014401 | 17 |
| MSI1        | 64914953 | 64937019 | 17 |
| COX6A1      | 64995247 | 64997122 | 17 |
| SIRT4       | 64875356 | 64891607 | 17 |
| RPLP0       | 64809253 | 64813277 | 17 |
| DYNLL1      | 65042595 | 65045026 | 17 |
| PLA2G1B     | 64899558 | 64902628 | 17 |
| GATC        | 65000549 | 65007059 | 17 |
| RAB35       | 64724241 | 64742928 | 17 |
| TRIAP1      | 64998264 | 65000579 | 17 |
| MLEC        | 65184867 | 65194880 | 17 |
| CABP1       | 65154258 | 65170682 | 17 |
| UNC119B     | 65206693 | 65216028 | 17 |
| ACADS       | 65220604 | 65237484 | 17 |
| PSMB10      | 35540354 | 35542906 | 18 |
| SLC7A6OS    | 35795186 | 35803175 | 18 |
| DUS2L       | 35602602 | 35634597 | 18 |
| SMPD3       | 35847628 | 35872312 | 18 |
| DDX28       | 35600675 | 35602509 | 18 |
| PLA2G15     | 35747166 | 35760966 | 18 |
| LCAT        | 35544365 | 35547611 | 18 |
| SLC7A6      | 35763842 | 35794542 | 18 |
| SLC12A4     | 35547821 | 35569646 | 18 |
| ESRP2       | 35734986 | 35741010 | 18 |
| NFATC3      | 35640708 | 35732176 | 18 |
| PSKH1       | 35510858 | 35535918 | 18 |
| PRMT7       | 35803281 | 35844344 | 18 |
| PAFAH1B1    | 24112442 | 24162110 | 19 |
| METTL16     | 23961073 | 24023406 | 19 |
| C19H17orf59 | 28443495 | 28445326 | 19 |
| KCNAB3      | 28214103 | 28220774 | 19 |
| TMEM107     | 28432874 | 28435112 | 19 |
| ALOX12B     | 28329830 | 28341331 | 19 |
| SLC25A35    | 28521122 | 28524591 | 19 |
| GUCY2D      | 28274098 | 28288581 | 19 |
| ARHGEF15    | 28541732 | 28550394 | 19 |
| MYH10       | 28680826 | 28800880 | 19 |
| RANGRF      | 28519718 | 28521136 | 19 |
| TRAPPC1     | 28221788 | 28223283 | 19 |
| VAMP2_AA    | 28408574 | 28410802 | 19 |
| PFAS        | 28498628 | 28511705 | 19 |
| ALOX15B     | 28306790 | 28315605 | 19 |
| ODF4        | 28565346 | 28570383 | 19 |
| HES7        | 28375016 | 28377490 | 19 |
| PER1        | 28390015 | 28399748 | 19 |
| NDEL1       | 28637768 | 28673102 | 19 |
| RPL26       | 28590311 | 28595225 | 19 |

Sheet1

|            |          |          |    |
|------------|----------|----------|----|
| AURKB      | 28447632 | 28452478 | 19 |
| NPR3       | 40965737 | 41042094 | 20 |
| SUB1       | 41122022 | 41143914 | 20 |
| CDH18      | 53409875 | 54014026 | 20 |
| MIR2361    | 53415662 | 53415738 | 20 |
| NMB        | 22741474 | 22744781 | 21 |
| WDR73      | 22735035 | 22740454 | 21 |
| SEC11A     | 22754372 | 22787431 | 21 |
| SLC28A1    | 22949799 | 23048041 | 21 |
| ZNF592     | 22822828 | 22871700 | 21 |
| MIR2364    | 22859904 | 22859978 | 21 |
| PDE8A      | 23119314 | 23262117 | 21 |
| KLHL18     | 52871072 | 52922306 | 22 |
| NRADD      | 53073617 | 53077203 | 22 |
| CCDC12     | 53110762 | 53147115 | 22 |
| PTPN23     | 52818929 | 52844833 | 22 |
| NGP        | 52858271 | 52862343 | 22 |
| PRSS45     | 53296645 | 53304315 | 22 |
| PRSS42     | 53236357 | 53240657 | 22 |
| KIF9       | 52925930 | 52959210 | 22 |
| MYL3       | 53202765 | 53208553 | 22 |
| PTH1R      | 53161299 | 53224114 | 22 |
| TMIE       | 53345153 | 53350541 | 22 |
| ALS2CL     | 53358572 | 53380721 | 22 |
| MOCS1      | 13832464 | 13866950 | 23 |
| LRFN2      | 14309127 | 14351087 | 23 |
| CHMP1B     | 43149700 | 43151533 | 24 |
| GNAL       | 43111843 | 43163945 | 24 |
| CIDEA      | 43217423 | 43235018 | 24 |
| CEP76      | 43500035 | 43515274 | 24 |
| TUBB6      | 43249499 | 43250810 | 24 |
| AFG3L2     | 43252924 | 43271906 | 24 |
| PSMG2      | 43515582 | 43525531 | 24 |
| PTPN2      | 43539720 | 43607744 | 24 |
| IMPA2      | 43189672 | 43209175 | 24 |
| SEH1L      | 43639268 | 43659103 | 24 |
| GNA12      | 41099258 | 41171209 | 25 |
| CARD11     | 40960557 | 41068748 | 25 |
| BRAT1      | 41206700 | 41216986 | 25 |
| PAPSS2     | 9292115  | 9402158  | 26 |
| ATAD1      | 9410908  | 9451790  | 26 |
| RNLS       | 9932076  | 10211164 | 26 |
| CLNS1A     | 18444586 | 18465090 | 29 |
| AQP11      | 18477127 | 18488713 | 29 |
| PAK1       | 18684327 | 18780241 | 29 |
| MIR2285K-4 | 18714778 | 18908690 | 29 |
